# Supplementary material for: Visible-light-promoted desulfonylative radical difluoroalkylation between difluoroenol silyl ethers and difluoroalkyl sulfones to construct functionalized aryltetrafluoroethane derivatives
Source: Royal Society of Chemistry journal article supplement (doi:10.1039/d3qo01606d), 2024-01-01

## Supporting information

### Visible-Light promoted desulfonylative radical difluoroalkylation between difluoroenol silyl ethers and difluoroalkyl sulfones to construct functionalized aryltetrafluoroethane derivatives

#### Contents

|                                                                                                     |     |
|-----------------------------------------------------------------------------------------------------|-----|
| 1. General information.....                                                                         | S2  |
| 2. Preparation of difluoroenol silyl ethers.....                                                    | S3  |
| 3. Preparation of $\alpha$ , $\alpha$ -difluorobenzyl/alkyl sulfones 2.....                         | S4  |
| 4. General procedure for reactions of sulfones 2 with difluoroenol silyl ethers.....                | S11 |
| 5. Transformation of compound 3ac.....                                                              | S26 |
| 6. late-stage functionalization.....                                                                | S30 |
| 6. Mechanistic experiments.....                                                                     | S32 |
| 7. References.....                                                                                  | S33 |
| 8. Copies of $^1\text{H}$ , $^{19}\text{F}$ , and $^{13}\text{C}$ NMR spectra for the products..... | S34 |

## 1. General Information

$^1\text{H}$  NMR (TMS as the internal standard),  $^{13}\text{C}$  NMR and  $^{19}\text{F}$  NMR ( $\text{CFCl}_3$  as outside standard and low field is positive) spectra were recorded on a Bruker AM 400 MHz spectrometer. For the determination of  $^{19}\text{F}$  NMR yield,  $\text{PhCF}_3$  was used as an internal standard and the relaxation delay (d1) was set to 5 s. Chemical shifts ( $\delta$ ) were reported in per million (ppm), and coupling constants ( $J$ ) were in Hertz (Hz). The following abbreviations were used to explain the multiplicities: s = singlet, d = doublet, t = triplet, q = quartet, m = multiplet. High resolution mass spectra (HRMS) were obtained on a GC-TOF mass spectrometer.

**Materials:** Unless otherwise noted, all reagents were obtained commercially and used without further purification. Substrates were prepared according to literature procedures. Reactions were performed using glassware that was flame-dried under vacuum.

## 2. Preparation of Difluoroenol Silyl Ethers

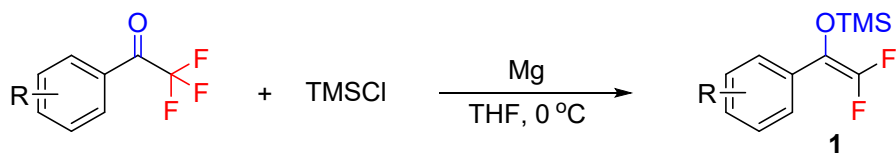

The difluoroenol silyl ethers **1** were freshly prepared from the corresponding trifluoroketones according to the literature procedures.<sup>1</sup> To a mixture of TMSCl (4.0 equiv) and Mg (4.0 equiv) in dry THF (0.25 M) was cooled down to 0 °C under N<sub>2</sub> atmosphere, then trifluoroacetophenone (1.0 equiv) was added dropwise. The reaction mixture was stirred for additional 30 min. After evaporation of solvent, hexane was added to the residue, and the resulting salt was filtered. The filtrate was concentrated to give crude difluoroenol silyl ethers, which could be used directly without further purification.

### 3. Preparation of $\alpha$ , $\alpha$ -difluorobenzyl/alkyl sulfones **2** (**2b**<sup>2</sup>, **2c**<sup>3</sup>, **2k**<sup>4</sup>, **2l**<sup>4</sup>)

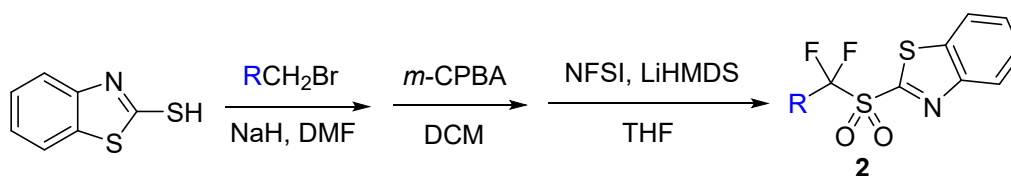

A 50-mL flask containing a magnetic stirring bar was flame-dried under vacuum and filled with argon after cooling to room temperature. To the flask were added benzo[d]thiazole-2-thiol (1.67 g, 10 mmol, 1.0 equiv) and dry DMF (20 mL) under a stream of argon. NaH (60% dispersion in mineral oil, 440 mg, 11 mmol, 1.1 equiv) was added to this mixture at 0 °C. After stirring at 0 °C for 10 min, corresponding benzyl or alkyl bromide (11 mmol, 1.1 equiv) was added at this temperature and the mixture was stirred at room temperature for 12 h. The mixture was quenched with cold water and extracted with ether (3 times). The combined extracts were dried over Na<sub>2</sub>SO<sub>4</sub>, and the solvent was evaporated under reduced pressure. The residue was dissolved in DCM (50 mL). *m*-CPBA (85%, 5.08 g, 25 mmol, 2.5 equiv) was slowly added to this solution at 0 °C and the mixture was stirred at room temperature for 12 h. The mixture was quenched with sat. Na<sub>2</sub>SO<sub>3</sub> solution (~6 mL) and was washed with 1N NaOH<sub>aq</sub> (3 times). The organic layer was dried over Na<sub>2</sub>SO<sub>4</sub> and evaporated under reduced pressure. The crude product was purified by column chromatography or recrystallization to afford the corresponding sulfones **2'**.

A 50-mL Schlenk flask containing a magnetic stirring bar was flame-dried under vacuum and filled with argon after cooling to room temperature. To the flask were added sulfones **2'** (3 mmol, 1.0 equiv) and dry THF (20 mL). LiHMDS (1.0 M in THF solution, 8 mL, 8 mmol, 2.67 equiv) was added dropwise to the reaction mixture at -78 °C under argon. After stirring at -78 °C for 30 min, a solution of NFSI (2.84 g, 9 mmol) in dry THF (10 mL) was added, the mixture was stirred at -78 °C for 30 min and then warmed to r.t. and stirring was continued for an additional 30 min. Sat. NH<sub>4</sub>Cl<sub>aq</sub> (~20 mL) was added and the solvent was evaporated under reduced pressure. The mixture was extracted with EtOAc (3 times), and the combined organic layer was dried over Na<sub>2</sub>SO<sub>4</sub> and evaporated under reduced pressure. The crude product was

purified by column chromatography to afford the corresponding  $\alpha$ ,  $\alpha$ -difluorobenzyl/alkyl sulfones **2**.

### 2-((4-(trifluoromethoxy)benzyl)sulfonyl)benzo[d]thiazole (**2a'**)

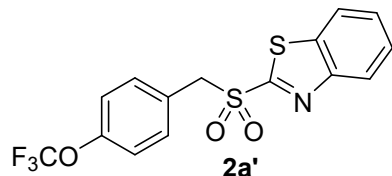

The product mixture was purified by silica gel column chromatography (hexane/EtOAc = 8:1) to afford **2a'** as a white solid. m.p. 134-136 °C; <sup>1</sup>H NMR (400 MHz, CDCl<sub>3</sub>)  $\delta$  ppm 8.24 (d,  $J$  = 8.2 Hz, 1H), 7.95 (d,  $J$  = 7.9 Hz, 1H), 7.71 – 7.52 (m, 2H), 7.33 (d,  $J$  = 8.6 Hz, 2H), 7.12 (d,  $J$  = 8.2 Hz, 2H), 4.77 (s, 2H); <sup>19</sup>F NMR (377 MHz, CDCl<sub>3</sub>)  $\delta$  ppm -57.81 (s, 3F); <sup>13</sup>C NMR (101 MHz, CDCl<sub>3</sub>)  $\delta$  ppm 164.9, 152.5, 149.9, 137.0, 132.7, 128.2, 127.8, 125.5, 125.1, 122.4, 121.2, 120.3 (q,  $J$  = 257.9 Hz), 60.1; IR (thin film)  $\nu$  1746, 1677, 1531, 1473, 1338, 1211, 1129, 948, 850, 666 cm<sup>-1</sup>; MS (ESI):  $m/z$  374.0 [M+H]<sup>+</sup>. HRMS (ESI):  $m/z$  Calculated for C<sub>15</sub>H<sub>11</sub>F<sub>3</sub>NO<sub>3</sub>S<sub>2</sub> [M+H]<sup>+</sup>: 374.0127; Found: 374.0129.

### 2-((3-bromobenzyl)sulfonyl)benzo[d]thiazole (**2g'**)

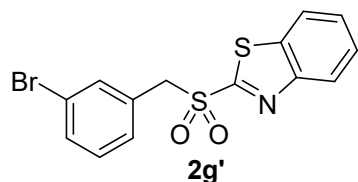

The product mixture was purified by silica gel column chromatography (hexane/EtOAc = 8:1) to afford **2g'** as a white solid. m.p. 149-151 °C; <sup>1</sup>H NMR (400 MHz, CDCl<sub>3</sub>)  $\delta$  ppm 8.25 (d,  $J$  = 8.2 Hz, 1H), 7.95 (d,  $J$  = 8.0 Hz, 1H), 7.62 (dt,  $J$  = 26.2, 7.4 Hz, 2H), 7.45 – 7.43 (m, 2H), 7.25 – 7.11 (m, 2H), 4.71 (s, 2H); <sup>13</sup>C NMR (101 MHz, CDCl<sub>3</sub>)  $\delta$  ppm 164.8, 152.5, 137.0, 134.1, 132.4, 130.4, 129.8, 128.5, 128.2, 127.8, 125.5, 122.8, 122.4, 60.3; IR (thin film)  $\nu$  1568, 1470, 1317, 1144, 850, 793, 760, 728, 690, 638 cm<sup>-1</sup>; MS (ESI):  $m/z$  367.9 [M+H]<sup>+</sup>. HRMS (ESI):  $m/z$  Calculated for C<sub>14</sub>H<sub>11</sub>F<sub>3</sub>BrNO<sub>2</sub>S<sub>2</sub> [M+H]<sup>+</sup>: 367.9409; Found: 367.9411.

### 2-((2-methylbenzyl)sulfonyl)benzo[d]thiazole (**2h'**)

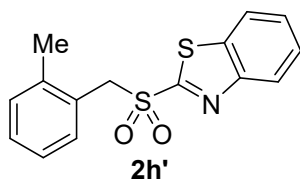

The product mixture was purified by silica gel column chromatography (hexane/EtOAc = 8:1) to afford **2g'** as a white solid. m.p. 124-126 °C; **<sup>1</sup>H NMR** (400 MHz, CDCl<sub>3</sub>) δ ppm 8.29 (d, *J* = 8.2 Hz, 1H), 7.97 (d, *J* = 8.0 Hz, 1H), 7.64 (dt, *J* = 27.2, 7.4 Hz, 2H), 7.29 – 7.16 (m, 3H), 7.10 (t, *J* = 7.2 Hz, 1H), 4.85 (s, 2H), 2.43 (s, 3H); **<sup>13</sup>C NMR** (101 MHz, CDCl<sub>3</sub>) δ ppm 165.7, 152.6, 138.9, 137.1, 132.1, 131.1, 129.5, 128.1, 127.7, 126.3, 125.5, 124.8, 122.4, 58.4, 19.8; **IR** (thin film) ν 1468, 1326, 1137, 1023, 854, 766, 728, 692, 641 cm<sup>-1</sup>; **MS** (ESI): *m/z* 304.0 [M+H]<sup>+</sup>. **HRMS** (ESI): *m/z* Calculated for C<sub>15</sub>H<sub>14</sub>NO<sub>2</sub>S<sub>2</sub> [M+H]<sup>+</sup>: 304.0460; Found: 304.0461.

#### 2-((3,5-dimethylbenzyl)sulfonyl)benzo[d]thiazole (**2i'**)

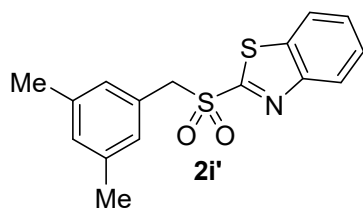

The product mixture was purified by silica gel column chromatography (hexane/EtOAc = 8:1) to afford **2i'** as a white solid. m.p. 158-160 °C; **<sup>1</sup>H NMR** (400 MHz, CDCl<sub>3</sub>) δ ppm 8.29 (d, *J* = 8.2 Hz, 1H), 7.97 (d, *J* = 8.0 Hz, 1H), 7.63 (dt, *J* = 27.8, 7.5 Hz, 2H), 6.95 (s, 1H), 6.89 (s, 2H), 4.69 (s, 2H), 2.20 (s, 6H); **<sup>13</sup>C NMR** (101 MHz, CDCl<sub>3</sub>) δ ppm 165.5, 152.6, 138.5, 137.1, 130.9, 128.9, 128.0, 127.7, 125.9, 125.4, 122.3, 61.2, 21.1; **IR** (thin film) ν 1470, 1316, 1153, 1127, 873, 858, 764, 729, 703, 602 cm<sup>-1</sup>; **MS** (ESI): *m/z* 318.1 [M+H]<sup>+</sup>. **HRMS** (ESI): *m/z* Calculated for C<sub>16</sub>H<sub>16</sub>NO<sub>2</sub>S<sub>2</sub> [M+H]<sup>+</sup>: 318.0617; Found: 318.0619.

#### 2-((difluoro(4-(trifluoromethoxy)phenyl)methyl)sulfonyl)benzo[d]thiazole (**2a**)

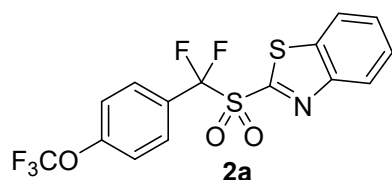

The product mixture was purified by silica gel column chromatography (hexane/DCM = 1:1) to afford **2a** as a white solid. m.p. 159-161 °C; **<sup>1</sup>H NMR** (400 MHz, CDCl<sub>3</sub>) δ ppm 8.36 (dd, *J* = 7.3, 1.7 Hz, 1H), 8.07 (dd, *J* = 7.2, 1.7 Hz, 1H),

7.83 (d,  $J = 8.8$  Hz, 2H), 7.72 – 7.65 (m, 2H), 7.39 (d,  $J = 8.3$  Hz, 2H);  **$^{19}\text{F}$  NMR** (377 MHz,  $\text{CDCl}_3$ )  $\delta$  ppm -57.67 (s, 3F), -99.69 (s, 2F);  **$^{13}\text{C}$  NMR** (101 MHz,  $\text{CDCl}_3$ )  $\delta$  ppm 158.7, 153.0, 152.8, 138.3, 130.2 (t,  $J = 5.9$  Hz), 129.0, 128.1, 126.3, 123.9 (t,  $J = 22.5$  Hz), 122.3, 122.0 (t,  $J = 290.5$  Hz), 120.9, 120.3 (q,  $J = 260.3$  Hz); **IR** (thin film)  $\nu$  1463, 1357, 1221, 1162, 1100, 1067, 922, 842, 761, 728, 618  $\text{cm}^{-1}$ ; **MS** (ESI):  $m/z$  410.0  $[\text{M}+\text{H}]^+$ . **HRMS** (ESI):  $m/z$  Calculated for  $\text{C}_{15}\text{H}_9\text{F}_5\text{NO}_3\text{S}_2$   $[\text{M}+\text{H}]^+$ : 409.9939; Found: 409.9941.

### 2-((difluoro(4-fluorophenyl)methyl)sulfonyl)benzo[d]thiazole (2d)

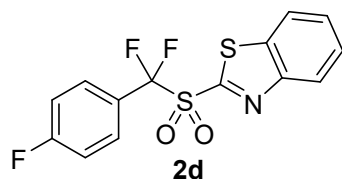

The product mixture was purified by silica gel column chromatography (hexane/DCM = 1:1) to afford **2d** as a white solid. m.p. 171-173  $^{\circ}\text{C}$ ;  **$^1\text{H}$  NMR** (400 MHz,  $\text{CDCl}_3$ )  $\delta$  ppm 8.44 – 8.32 (m, 1H), 8.19 – 8.03 (m, 1H), 7.77 (dd,  $J = 8.7, 5.1$  Hz, 2H), 7.72 – 7.66 (m, 2H), 7.24 (t,  $J = 9.2$  Hz, 2H);  **$^{19}\text{F}$  NMR** (377 MHz,  $\text{CDCl}_3$ )  $\delta$  ppm -99.24 (s, 2F), -104.87 – -104.91 (m, 1F);  **$^{13}\text{C}$  NMR** (101 MHz,  $\text{CDCl}_3$ )  $\delta$  ppm 165.7 (d,  $J = 255.8$ ), 159.0, 153.0, 138.3, 130.6 (dt,  $J = 9.5, 6.0$  Hz), 128.9, 128.1, 126.3, 122.3, 122.2 (t,  $J = 290.3$  Hz), 121.5 (td,  $J = 22.4, 3.3$  Hz), 116.4 (d,  $J = 22.5$  Hz); **IR** (thin film)  $\nu$  1604, 1462, 1353, 1278, 1168, 1060, 839, 758, 720, 620  $\text{cm}^{-1}$ ; **MS** (ESI):  $m/z$  366.0  $[\text{M}+\text{Na}]^+$ . **HRMS** (ESI):  $m/z$  Calculated for  $\text{C}_{14}\text{H}_8\text{F}_3\text{NNaO}_2\text{S}_2$   $[\text{M}+\text{Na}]^+$ : 365.9841; Found: 365.9841.

### 2-(((4-chlorophenyl)difluoromethyl)sulfonyl)benzo[d]thiazole (2e)

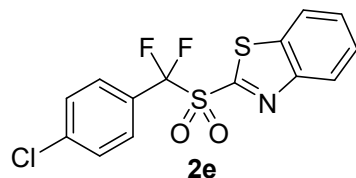

The product mixture was purified by silica gel column chromatography (hexane/DCM = 1:1) to afford **2e** as a white solid. m.p. 227-229  $^{\circ}\text{C}$ ;  **$^1\text{H}$  NMR** (400 MHz,  $\text{CDCl}_3$ )  $\delta$  ppm 8.30 (d,  $J = 8.7$  Hz, 1H), 8.01 (d,  $J = 7.4$  Hz, 1H), 7.74 – 7.56 (m, 4H), 7.47 (d,  $J = 8.4$  Hz, 2H);  **$^{19}\text{F}$  NMR** (377 MHz,  $\text{CDCl}_3$ )  $\delta$  ppm -99.91 (s, 2F);  **$^{13}\text{C}$  NMR** (101 MHz,  $\text{CDCl}_3$ )  $\delta$  ppm 158.1, 152.0, 138.9, 137.3, 128.4 (t,  $J = 5.9$  Hz), 128.3, 127.9, 127.1, 125.3, 122.9 (t,  $J = 22.5$  Hz), 121.4 (t,  $J = 308.1$  Hz), 121.3; **IR** (thin film)  $\nu$

1597, 1462, 1356, 1280, 1169, 1068, 1011, 819, 764, 616  $\text{cm}^{-1}$ ; **MS** (ESI):  $m/z$  360.0  $[\text{M}+\text{H}]^+$ . **HRMS** (ESI):  $m/z$  Calculated for  $\text{C}_{14}\text{H}_9\text{ClF}_2\text{NO}_2\text{S}_2$   $[\text{M}+\text{H}]^+$ : 359.9726; Found: 359.9729.

### 2-((difluoro(4-(trifluoromethyl)phenyl)methyl)sulfonyl)benzo[d]thiazole (2f)

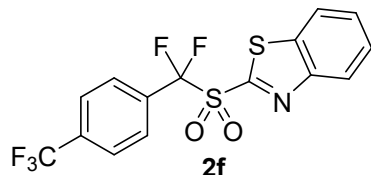

The product mixture was purified by silica gel column chromatography (hexane/DCM = 1:1) to afford **2f** as a white solid. m.p. 186-188 °C; **<sup>1</sup>H NMR** (400 MHz,  $\text{CDCl}_3$ )  $\delta$  ppm 8.28 (dd,  $J = 7.3, 1.6$  Hz, 1H), 8.00 (dd,  $J = 7.3, 1.8$  Hz, 1H), 7.84 – 7.73 (m, 4H), 7.65 – 7.58 (m, 2H); **<sup>19</sup>F NMR** (377 MHz,  $\text{CDCl}_3$ )  $\delta$  ppm -63.27 (s, 3F), -100.35 (s, 2F); **<sup>13</sup>C NMR** (101 MHz,  $\text{CDCl}_3$ )  $\delta$  ppm 158.5, 153.0, 138.4, 134.9 (q,  $J = 33.3$  Hz), 129.3 (t,  $J = 21.4$  Hz), 129.0, 128.7 (t,  $J = 5.9$  Hz), 128.2, 126.4, 126.0 (q,  $J = 3.7$  Hz), 123.2 (q,  $J = 274.0$  Hz), 122.3, 122.0 (q,  $J = 291.6$  Hz); **IR** (thin film)  $\nu$  1457, 1367, 1321, 1276, 1172, 1102, 1063, 823, 764, 622  $\text{cm}^{-1}$ ; **MS** (ESI):  $m/z$  394.0  $[\text{M}+\text{H}]^+$ . **HRMS** (ESI):  $m/z$  Calculated for  $\text{C}_{15}\text{H}_9\text{F}_5\text{NO}_2\text{S}_2$   $[\text{M}+\text{H}]^+$ : 393.9989; Found: 393.9995.

### 2-(((3-bromophenyl)difluoromethyl)sulfonyl)benzo[d]thiazole (2g)

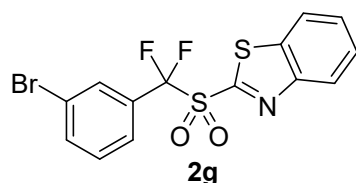

The product mixture was purified by silica gel column chromatography (hexane/DCM = 1:1) to afford **2g** as a white solid. m.p. 149-151 °C; **<sup>1</sup>H NMR** (400 MHz,  $\text{CDCl}_3$ )  $\delta$  ppm 8.37 (dd,  $J = 7.4, 1.5$  Hz, 1H), 8.07 (dd,  $J = 7.4, 1.5$  Hz, 1H), 7.88 (s, 1H), 7.77 (d,  $J = 8.0$  Hz, 1H), 7.73 – 7.67 (m, 3H), 7.43 (t,  $J = 7.9$  Hz, 1H); **<sup>19</sup>F NMR** (377 MHz,  $\text{CDCl}_3$ )  $\delta$  ppm -99.89 (s, 2F); **<sup>13</sup>C NMR** (101 MHz,  $\text{CDCl}_3$ )  $\delta$  ppm 158.7, 153.0, 138.3, 136.2, 131.0 (t,  $J = 6.2$  Hz), 130.4, 129.0, 128.2, 127.6 (t,  $J = 22.0$  Hz), 126.7 (t,  $J = 5.9$  Hz), 126.3, 123.0, 122.3, 121.6 (t,  $J = 290.0$  Hz); **IR** (thin film)  $\nu$  1459, 1359, 1260, 1169, 1078, 951, 795, 764, 748, 612  $\text{cm}^{-1}$ ; **MS** (ESI):  $m/z$  403.9  $[\text{M}+\text{H}]^+$ . **HRMS** (ESI):  $m/z$  Calculated for  $\text{C}_{14}\text{H}_9\text{F}_2\text{BrNO}_2\text{S}_2$   $[\text{M}+\text{H}]^+$ : 403.9221; Found: 403.9224.



### 2-((difluoro(*o*-tolyl)methyl)sulfonyl)benzo[*d*]thiazole (2h)

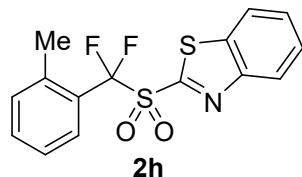

The product mixture was purified by silica gel column chromatography (hexane/DCM = 2:1) to afford **2h** as a white solid. m.p. 170-172 °C; **<sup>1</sup>H NMR** (400 MHz, CDCl<sub>3</sub>) δ ppm 8.28 (dd, *J* = 7.6, 1.2 Hz, 1H), 7.97 (dd, *J* = 7.1, 1.1 Hz, 1H), 7.64 – 7.54 (m, 3H), 7.40 (t, *J* = 7.5 Hz, 1H), 7.24 (t, *J* = 6.6 Hz, 2H), 2.59 (t, *J* = 3.3 Hz, 1H); **<sup>19</sup>F NMR** (377 MHz, CDCl<sub>3</sub>) δ ppm -93.82 (s, 2F); **<sup>13</sup>C NMR** (101 MHz, CDCl<sub>3</sub>) δ ppm 158.6, 152.0, 138.6, 137.3, 131.9, 131.7, 128.8 (t, *J* = 8.3 Hz), 127.7, 126.9, 125.2, 125.1, 123.1 (t, *J* = 291.8 Hz), 122.7 (t, *J* = 19.7 Hz), 121.2, 19.8; **IR** (thin film) ν 1461, 1351, 1255, 1166, 1045, 920, 753, 723, 694, 609 cm<sup>-1</sup>; **MS** (ESI): *m/z* 362.0 [M+Na]<sup>+</sup>. **HRMS** (ESI): *m/z* Calculated for C<sub>15</sub>H<sub>11</sub>F<sub>2</sub>NNaO<sub>2</sub>S<sub>2</sub> [M+Na]<sup>+</sup>: 362.0091; Found: 362.0093.

### 2-(((3,5-dimethylphenyl)difluoromethyl)sulfonyl)benzo[*d*]thiazole (2i)

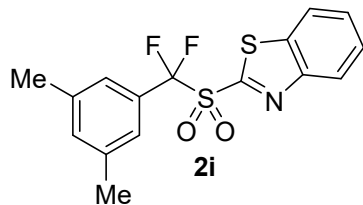

The product mixture was purified by silica gel column chromatography (hexane/DCM = 2:1) to afford **2i** as a white solid. m.p. 174-176 °C; **<sup>1</sup>H NMR** (400 MHz, CDCl<sub>3</sub>) δ ppm 8.35 (d, *J* = 7.7 Hz, 1H), 8.04 (d, *J* = 7.5 Hz, 1H), 7.73 – 7.54 (m, 2H), 7.35 (s, 2H), 7.24 (s, 1H), 2.36 (s, 6H); **<sup>19</sup>F NMR** (377 MHz, CDCl<sub>3</sub>) δ ppm -99.13 (s, 2F); **<sup>13</sup>C NMR** (101 MHz, CDCl<sub>3</sub>) δ ppm 159.5, 153.0, 138.8, 138.3, 134.8, 128.7, 128.0, 126.2, 125.6 (t, *J* = 5.9 Hz), 125.2 (t, *J* = 21.3 Hz), 122.8 (t, *J* = 289.9 Hz), 122.2, 21.2; **IR** (thin film) ν 1460, 1354, 1166, 1097, 962, 858, 758, 726, 696, 618 cm<sup>-1</sup>; **MS** (ESI): *m/z* 376.0 [M+Na]<sup>+</sup>. **HRMS** (ESI): *m/z* Calculated for C<sub>16</sub>H<sub>13</sub>F<sub>2</sub>NNaO<sub>2</sub>S<sub>2</sub> [M+Na]<sup>+</sup>: 376.0248; Found: 376.0250.

### 2-((difluoro(perfluorophenyl)methyl)sulfonyl)benzo[*d*]thiazole (2j)

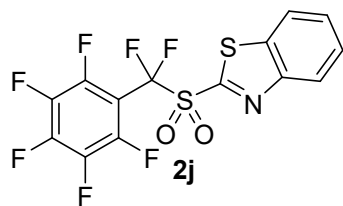

The product mixture was purified by silica gel column chromatography (hexane/DCM = 2:1) to afford **2j** as a white solid. m.p. 155-157 °C; **<sup>1</sup>H NMR** (400 MHz, CDCl<sub>3</sub>) δ ppm 8.27 – 8.07 (m, 1H), 8.06 – 7.80 (m, 1H), 7.72 – 7.35 (m, 2H); **<sup>19</sup>F NMR** (377 MHz, CDCl<sub>3</sub>) δ ppm -95.15 (t, *J* = 31.5 Hz, 2F), -131.83 – -137.83 (m, 2F), -143.51 (tt, *J* = 21.4, 6.7 Hz, 1F), -155.38 – -162.79 (m, 2F); **<sup>13</sup>C NMR** (101 MHz, CDCl<sub>3</sub>) δ ppm 157.5, 153.1, 147.5 – 144.5 (m), 146.0 – 143.2 (m), 139.6 – 136.7 (m), 138.5, 129.3, 128.4, 126.3, 122.4, 120.1 (t, *J* = 295.6 Hz), 103.10 – 101.13 (m); **IR** (thin film)  $\nu$  1654, 1505, 1463, 1361, 1168, 1095, 977, 817, 771, 630 cm<sup>-1</sup>; **MS** (ESI): *m/z* 416.0 [M+H]<sup>+</sup>. **HRMS** (ESI): *m/z* Calculated for C<sub>14</sub>H<sub>5</sub>F<sub>7</sub>NO<sub>2</sub>S<sub>2</sub> [M+H]<sup>+</sup>: 415.9644; Found: 415.9649.

#### 4. General procedure for reactions of sulfones **2** with difluoroenol silyl ethers

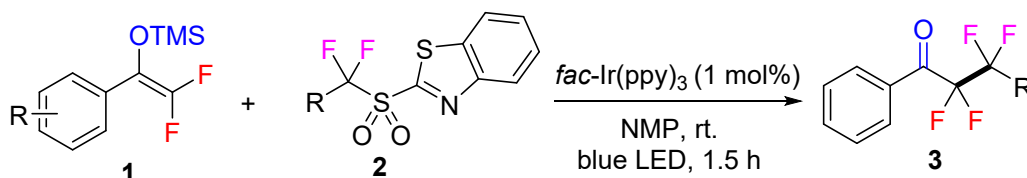

A 25 mL of Schlenk tube equipped with a rubber septum and magnetic stirring bar, *fac*-Ir(ppy)<sub>3</sub> (2.6 mg, 0.004 mmol, 1 mol %) and difluoroalkyl sulfone **2** (0.4 mmol, 1.0 equiv) were dissolved in dry NMP (2.0 mL), then difluoroenol silyl ethers **1** (0.8 mmol, 2.0 equiv) was added. The mixture was degassed three times by the freeze-pump-thaw procedure. The flask was placed at a distance of 2 cm from the blue LEDs. After 1.5 hours, the reaction was quenched by water, extracted by Et<sub>2</sub>O. The organic phase was dried by anhydrous sodium sulfate, then the solvent was removed under reduced pressure and the residue was purified by flash chromatography on silica gel to afford the desired products **3**.

#### 2,2,3,3-tetrafluoro-1-phenyl-3-(4-(trifluoromethoxy)phenyl)propan-1-one (**3aa**)

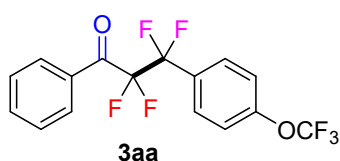

The product mixture was purified by silica gel column chromatography (hexane/EtOAc = 100:1) to afford **3aa** (87.9 mg, 60%) as a yellowish liquid. <sup>1</sup>H NMR (400 MHz, CDCl<sub>3</sub>) δ ppm 7.99 (d, *J* = 7.9 Hz, 2H), 7.60 – 7.56 (m, 3H), 7.42 (t, *J* = 7.8 Hz, 2H), 7.23 (d, *J* = 8.4 Hz, 2H); <sup>19</sup>F NMR (377 MHz, CDCl<sub>3</sub>) δ ppm -57.78 (s, 3F), -109.56 (s, 2F), -112.86 (s, 2F); <sup>13</sup>C NMR (101 MHz, CDCl<sub>3</sub>) δ ppm 184.6 (t, *J* = 26.7 Hz), 150.5, 133.9, 131.4, 129.3 (t, *J* = 3.4 Hz), 128.0 (t, *J* = 6.4 Hz), 127.8, 127.5 (t, *J* = 25.0 Hz), 119.6, 119.3 (q, *J* = 258.5 Hz), 114.5 (tt, *J* = 255.3, 31.7 Hz), 110.8 (tt, *J* = 266.6, 38.2 Hz); IR (thin film) ν 1704, 1598, 1513, 1255, 1211, 1149, 1079, 975, 838, 713, 660 cm<sup>-1</sup>; MS (EI): *m/z*

366.0 [M]<sup>+</sup>. **HRMS** (EI): *m/z* Calculated for C<sub>16</sub>H<sub>9</sub>F<sub>7</sub>O<sub>2</sub> [M]<sup>+</sup>: 366.0491; Found: 366.0480.

**2,2,3,3-tetrafluoro-1-(p-tolyl)-3-(4-(trifluoromethoxy)phenyl)propan-1-one (3ba)**

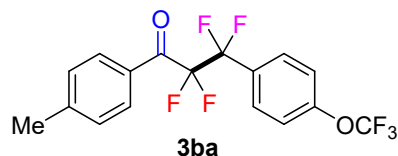

The product mixture was purified by silica gel column chromatography (hexane/EtOAc = 100:1) to afford **3ba** (85.1 mg, 56%) as a yellowish liquid. **<sup>1</sup>H NMR** (400 MHz, CDCl<sub>3</sub>) δ ppm 7.88 (d, *J* = 8.0 Hz, 2H), 7.58 (d, *J* = 8.5 Hz, 2H), 7.23 – 7.18 (m, 4H), 2.34 (s, 2H); **<sup>19</sup>F NMR** (377 MHz, CDCl<sub>3</sub>) δ ppm -57.80 (s, 3F), -109.63 (s, 2F), -112.86 (s, 2F); **<sup>13</sup>C NMR** (101 MHz, CDCl<sub>3</sub>) δ ppm 184.1 (t, *J* = 26.5 Hz), 150.5, 145.3, 129.4 (t, *J* = 3.2 Hz), 128.9, 128.5, 128.0 (t, *J* = 6.3 Hz), 127.6 (t, *J* = 25.1 Hz), 119.5, 119.3 (q, *J* = 258.7 Hz), 114.7 (tt, *J* = 255.3, 31.8 Hz), 110.9 (tt, *J* = 266.4, 38.2 Hz); **IR** (thin film) ν 1698, 1607, 1513, 1255, 1211, 1146, 1079, 974, 845, 751, 609 cm<sup>-1</sup>; **MS** (EI): *m/z* 380.0 [M]<sup>+</sup>. **HRMS** (EI): *m/z* Calculated for C<sub>17</sub>H<sub>11</sub>F<sub>7</sub>O<sub>2</sub> [M]<sup>+</sup>: 380.0647; Found: 380.0648.

**1-(4-(tert-butyl)phenyl)-2,2,3,3-tetrafluoro-3-(4-(trifluoromethoxy)phenyl)propan-1-one (3ca)**

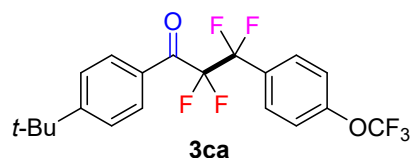

The product mixture was purified by silica gel column chromatography (hexane/EtOAc = 100:1) to afford **3ca** (99.6 mg, 59%) as a yellowish liquid; **<sup>1</sup>H NMR** (400 MHz, CDCl<sub>3</sub>) δ ppm 7.93 (d, *J* = 8.2 Hz, 2H), 7.59 (d, *J* = 8.5 Hz, 2H), 7.42 (d, *J* = 8.4 Hz, 2H), 7.22 (d, *J* = 8.4 Hz, 2H), 1.25 (s, 9H); **<sup>19</sup>F NMR** (377 MHz, CDCl<sub>3</sub>) δ ppm -57.78 (s, 3F), -109.59 (s, 2F), -112.85 (s, 2F); **<sup>13</sup>C NMR** (101 MHz, CDCl<sub>3</sub>) δ ppm 184.1 (t, *J* = 26.5 Hz), 158.1, 150.4, 129.3 (t, *J* = 3.1 Hz), 128.8, 128.0 (t, *J* = 6.4 Hz), 127.6 (t, *J* = 25.1 Hz), 124.8, 119.5, 119.3 (q, *J* = 258.5 Hz), 115.0 (tt, *J* = 255.3, 31.7 Hz), 110.9 (tt, *J* = 266.4, 38.0 Hz), 34.3, 29.8; **IR** (thin film) ν 1679, 1604, 1514, 1257, 1213, 1153, 1027, 976, 877, 692 cm<sup>-1</sup>; **MS** (ESI): *m/z* 423.1

[M+H]<sup>+</sup>. **HRMS** (ESI): *m/z* Calculated for C<sub>20</sub>H<sub>18</sub>F<sub>7</sub>O<sub>2</sub> [M+H]<sup>+</sup>: 423.1190; Found: 423.1189.

**2,2,3,3-tetrafluoro-1-(4-methoxyphenyl)-3-(4-(trifluoromethoxy)phenyl)propan-1-one (3da)**

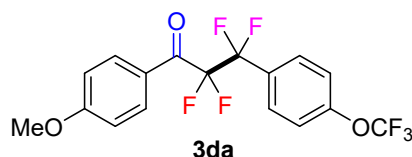

The product mixture was purified by silica gel column chromatography (hexane/EtOAc = 50:1) to afford **3da** (104.6 mg, 66%) as a yellowish liquid; <sup>1</sup>H NMR (400 MHz, CDCl<sub>3</sub>) δ ppm 7.97 (d, *J* = 8.7 Hz, 2H), 7.57 (d, *J* = 8.6 Hz, 2H), 7.21 (d, *J* = 8.4 Hz, 2H), 6.86 (d, *J* = 8.8 Hz, 2H), 3.79 (s, 3H); <sup>19</sup>F NMR (377 MHz, CDCl<sub>3</sub>) δ ppm -57.81 (s, 3F), -109.67 (s, 2F), -112.65 (s, 2F); <sup>13</sup>C NMR (101 MHz, CDCl<sub>3</sub>) δ ppm 182.7 (t, *J* = 26.2 Hz), 164.0, 150.4, 132.0 (t, *J* = 3.4 Hz), 127.9 (t, *J* = 6.3 Hz), 127.6 (t, *J* = 25.1 Hz), 124.3, 119.5, 119.3 (q, *J* = 258.7 Hz), 114.8 (tt, *J* = 255.3, 31.7 Hz), 113.1, 111.5 (tt, *J* = 266.3, 37.8 Hz), 54.6; **IR** (thin film) ν 1690, 1599, 1512, 1254, 1211, 1142, 1028, 974, 842, 701 cm<sup>-1</sup>; **MS** (ESI): *m/z* 397.1 [M+H]<sup>+</sup>. **HRMS** (ESI): *m/z* Calculated for C<sub>17</sub>H<sub>12</sub>F<sub>7</sub>O<sub>3</sub> [M+H]<sup>+</sup>: 397.0669; Found: 397.0670.

**2,2,3,3-tetrafluoro-1-(4-phenoxyphenyl)-3-(4-(trifluoromethoxy)phenyl)propan-1-one (3ea)**

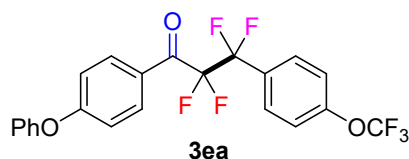

The product mixture was purified by silica gel column chromatography (hexane/EtOAc = 50:1) to afford **3ea** (119.1 mg, 65%) as a colorless liquid. <sup>1</sup>H NMR (400 MHz, CDCl<sub>3</sub>) δ ppm 7.97 (d, *J* = 8.6 Hz, 2H), 7.56 (d, *J* = 8.5 Hz, 2H), 7.32 (t, *J* = 7.8 Hz, 2H), 7.20 (d, *J* = 8.4 Hz, 2H), 7.14 (t, *J* = 7.4 Hz, 1H), 6.99 (d, *J* = 7.9 Hz, 2H), 6.90 (d, *J* = 8.8 Hz, 2H); <sup>19</sup>F NMR (377 MHz, CDCl<sub>3</sub>) δ ppm -57.75 (s, 3F), -109.56 (s, 2F), -112.65 (s, 2F); <sup>13</sup>C NMR (101 MHz, CDCl<sub>3</sub>) δ ppm 182.8 (t, *J* = 26.4 Hz), 162.8, 153.6, 150.4, 131.9 (t, *J* = 3.4 Hz), 129.2, 127.9 (t, *J* = 6.4 Hz), 127.5 (t, *J* = 25.1 Hz), 125.6, 124.2, 119.6, 119.5, 119.3 (q, *J* = 258.6 Hz), 116.0, 114.7 (tt, *J* =

255.3, 31.9 Hz), 111.0 (tt,  $J = 266.2, 38.3$  Hz); **IR** (thin film)  $\nu$  1694, 1585, 1489, 1248, 1145, 1079, 975, 876, 750, 692  $\text{cm}^{-1}$ ; **MS** (ESI):  $m/z$  459.1  $[\text{M}+\text{H}]^+$ . **HRMS** (ESI):  $m/z$  Calculated for  $\text{C}_{12}\text{H}_{14}\text{F}_7\text{O}_3$   $[\text{M}+\text{H}]^+$ : 459.0826; Found: 459.0826.

**2,2,3,3-tetrafluoro-1-(4-(methylthio)phenyl)-3-(4-(trifluoromethoxy)phenyl)propan-1-one (3fa)**

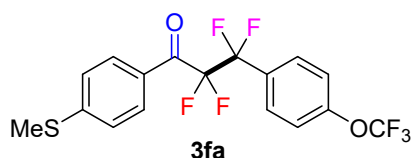

The product mixture was purified by silica gel column chromatography (hexane/EtOAc = 80:1) to afford **3fa** (100.5 mg, 61%) as a yellow liquid.  **$^1\text{H}$  NMR** (400 MHz,  $\text{CDCl}_3$ )  $\delta$  ppm 7.88 (d,  $J = 8.6$  Hz, 2H), 7.57 (d,  $J = 8.8$  Hz, 2H), 7.21 (d,  $J = 8.3$  Hz, 2H), 7.19 – 7.16 (m, 2H), 2.42 (s, 3H);  **$^{19}\text{F}$  NMR** (377 MHz,  $\text{CDCl}_3$ )  $\delta$  ppm -57.79 (s, 3F), -109.58 (s, 2F), -112.79 (s, 2F);  **$^{13}\text{C}$  NMR** (101 MHz,  $\text{CDCl}_3$ )  $\delta$  ppm 183.3 (t,  $J = 26.4$  Hz), 150.5, 148.3, 129.6 (t,  $J = 3.4$  Hz), 127.9 (t,  $J = 6.3$  Hz), 127.5 (t,  $J = 25.0$  Hz), 127.4, 123.7, 119.5, 119.3 (q,  $J = 258.6$  Hz), 114.7 (tt,  $J = 255.2, 31.7$  Hz), 111.0 (tt,  $J = 266.2, 38.2$  Hz); **IR** (thin film)  $\nu$  1691, 1587, 1255, 1211, 1149, 1092, 974, 840, 753, 674  $\text{cm}^{-1}$ ; **MS** (ESI):  $m/z$  413.0  $[\text{M}+\text{H}]^+$ . **HRMS** (ESI):  $m/z$  Calculated for  $\text{C}_{17}\text{H}_{12}\text{F}_7\text{O}_2\text{S}$   $[\text{M}+\text{H}]^+$ : 413.0441; Found: 413.0443.

**2,2,3,3-tetrafluoro-1-(4-fluorophenyl)-3-(4-(trifluoromethoxy)phenyl)propan-1-one (3ga)**

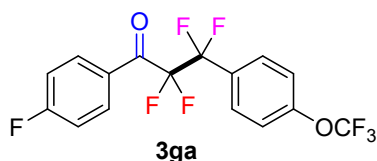

The product mixture was purified by silica gel column chromatography (hexane/EtOAc = 100:1) to afford **3ga** (90.6 mg, 59%) as a yellowish liquid.  **$^1\text{H}$  NMR** (400 MHz,  $\text{CDCl}_3$ )  $\delta$  ppm 8.03 (dd,  $J = 8.8, 5.4$  Hz, 2H), 7.58 (d,  $J = 8.8$  Hz, 2H), 7.22 (d,  $J = 8.3$  Hz, 2H), 7.13 – 7.04 (m, 2H);  **$^{19}\text{F}$  NMR** (377 MHz,  $\text{CDCl}_3$ )  $\delta$  ppm -57.86 (s, 3F), -100.88 – -100.94 (m, 1F), -109.56 (s, 2F), -112.84 (s, 2F);  **$^{13}\text{C}$  NMR** (101 MHz,  $\text{CDCl}_3$ )  $\delta$  ppm 183.0 (t,  $J = 26.9$  Hz), 165.8 (d,  $J = 260.0$  Hz), 150.6, 132.3 (dt,  $J = 9.9, 5.2$  Hz), 128.0 (t,  $J = 6.4$  Hz), 127.3 (t,  $J = 25.0$  Hz), 119.6, 119.3 (q,  $J = 258.7$  Hz), 115.3, 115.1, 114.7 (tt,  $J = 255.2, 31.9$  Hz), 110.9 (tt,  $J = 266.1,$

38.5 Hz); **IR** (thin film)  $\nu$  1705, 1561, 1508, 1257, 1211, 1151, 1078, 975, 848, 608  $\text{cm}^{-1}$ ; **MS** (EI):  $m/z$  384.0  $[\text{M}]^+$ . **HRMS** (EI):  $m/z$  Calculated for  $\text{C}_{16}\text{H}_8\text{F}_8\text{O}_2$   $[\text{M}]^+$ : 384.0397; Found: 384.0387.

**1-(4-chlorophenyl)-2,2,3,3-tetrafluoro-3-(4-(trifluoromethoxy)phenyl)propan-1-one (3ha)**

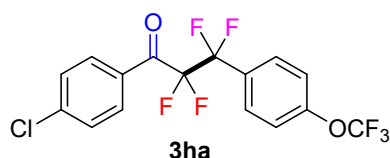

The product mixture was purified by silica gel column chromatography (hexane/EtOAc = 100:1) to afford **3ha** (88.0 mg, 55%) as a yellowish liquid.  **$^1\text{H}$  NMR** (400 MHz,  $\text{CDCl}_3$ )  $\delta$  ppm 7.93 (d,  $J$  = 8.5 Hz, 2H), 7.58 (d,  $J$  = 8.7 Hz, 2H), 7.40 (d,  $J$  = 8.7 Hz, 2H), 7.23 (d,  $J$  = 8.4 Hz, 2H);  **$^{19}\text{F}$  NMR** (377 MHz,  $\text{CDCl}_3$ )  $\delta$  ppm -57.81 (s, 3F), -109.49 (s, 2F), -112.95 (s, 2F);  **$^{13}\text{C}$  NMR** (101 MHz,  $\text{CDCl}_3$ )  $\delta$  ppm 183.5 (t,  $J$  = 27.1 Hz), 150.6, 140.9, 130.7 (t,  $J$  = 3.3 Hz), 129.7, 128.2, 127.9 (t,  $J$  = 6.4 Hz), 127.2 (t,  $J$  = 24.9 Hz), 119.6, 119.3 (q,  $J$  = 258.7 Hz), 114.7 (tt,  $J$  = 255.4, 31.9 Hz), 110.8 (tt,  $J$  = 266.4, 38.8 Hz); **IR** (thin film)  $\nu$  1706, 1589, 1255, 1211, 1154, 1095, 975, 839, 753  $\text{cm}^{-1}$ ; **MS** (EI):  $m/z$  400.0  $[\text{M}]^+$ . **HRMS** (EI):  $m/z$  Calculated for  $\text{C}_{16}\text{H}_8\text{ClF}_7\text{O}_2$   $[\text{M}]^+$ : 400.0101; Found: 400.0095.

**2,2,3,3-tetrafluoro-1-(*m*-tolyl)-3-(4-(trifluoromethoxy)phenyl)propan-1-one (3ia)**

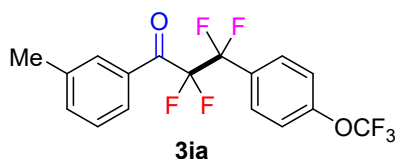

The product mixture was purified by silica gel column chromatography (hexane/EtOAc = 100:1) to afford **3ia** (95.8 mg, 63%) as a yellowish liquid.  **$^1\text{H}$  NMR** (400 MHz,  $\text{CDCl}_3$ )  $\delta$  ppm 7.77 (d,  $J$  = 8.5 Hz, 2H), 7.58 (d,  $J$  = 8.8 Hz, 2H), 7.37 (d,  $J$  = 7.6 Hz, 1H), 7.28 (t,  $J$  = 7.7 Hz, 1H), 7.21 (d,  $J$  = 8.3 Hz, 2H), 2.31 (s, 3H);  **$^{19}\text{F}$  NMR** (377 MHz,  $\text{CDCl}_3$ ) -57.82 (s, 3F), -109.62 (s, 2F), -112.79 (s, 2F);  **$^{13}\text{C}$  NMR** (101 MHz,  $\text{CDCl}_3$ )  $\delta$  ppm 184.7 (t,  $J$  = 26.7 Hz), 150.5, 137.7, 134.7, 131.4, 129.6 (t,  $J$  = 2.8 Hz), 128.0 (t,  $J$  = 6.4 Hz), 127.6, 127.5 (t,  $J$  = 25.1 Hz), 126.5 (t,  $J$  = 3.7 Hz), 119.5, 119.3 (q,  $J$  = 258.6 Hz), 114.7 (tt,  $J$  = 255.5, 31.6 Hz), 110.9 (tt,  $J$  = 266.7, 38.0 Hz), 20.2; **IR** (thin film)  $\nu$  1702, 1513, 1255, 1212, 1136, 1079, 978, 742, 661

cm<sup>-1</sup>; **MS** (EI): *m/z* 380.1 [M]<sup>+</sup>. **HRMS** (EI): *m/z* Calculated for C<sub>17</sub>H<sub>11</sub>F<sub>7</sub>O<sub>2</sub> [M]<sup>+</sup>: 380.0647; Found: 380.0641.

**2,2,3,3-tetrafluoro-1-(3-methoxyphenyl)-3-(4-(trifluoromethoxy)phenyl)propan-1-one (3ja)**

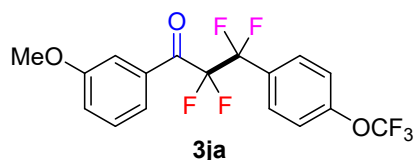

The product mixture was purified by silica gel column chromatography (hexane/EtOAc = 50:1) to afford **3ja** (93.5 mg, 59%) as a yellowish liquid. **<sup>1</sup>H NMR** (400 MHz, CDCl<sub>3</sub>) δ ppm 7.59 – 7.57 (m, 2H), 7.47 (s, 1H), 7.31 (t, *J* = 8.0 Hz, 1H), 7.22 (d, *J* = 8.3 Hz, 2H), 7.11 (ddd, *J* = 8.3, 2.6, 0.8 Hz, 1H), 3.75 (s, 1H); **<sup>19</sup>F NMR** (377 MHz, CDCl<sub>3</sub>) δ ppm -57.82 (s, 3F), -109.54 (s, 2F), -112.66 (s, 2F); **<sup>13</sup>C NMR** (101 MHz, CDCl<sub>3</sub>) δ ppm 184.4 (t, *J* = 26.9 Hz), 158.8, 150.5, 132.5, 128.8, 128.0 (t, *J* = 6.4 Hz), 127.5 (t, *J* = 25.0 Hz), 121.9 (t, *J* = 4.3 Hz), 120.5, 119.5, 119.3 (q, *J* = 258.6 Hz), 114.7 (tt, *J* = 255.4, 31.8 Hz), 113.3, 110.8 (tt, *J* = 266.8, 38.2 Hz); **IR** (thin film) ν 1702, 1598, 1253, 1211, 1153, 1079, 981, 850, 753, 662 cm<sup>-1</sup>; **MS** (EI): *m/z* 396.1 [M]<sup>+</sup>. **HRMS** (EI): *m/z* Calculated for C<sub>17</sub>H<sub>11</sub>F<sub>7</sub>O<sub>3</sub> [M]<sup>+</sup>: 396.0596; Found: 396.0593.

**1-(3-chlorophenyl)-2,2,3,3-tetrafluoro-3-(4-(trifluoromethoxy)phenyl)propan-1-one (3ka)**

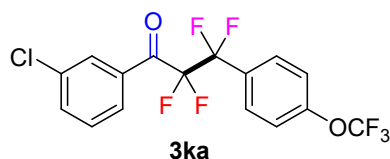

The product mixture was purified by silica gel column chromatography (hexane/EtOAc = 100:1) to afford **3ka** (92.8 mg, 58%) as a colorless liquid; **<sup>1</sup>H NMR** (400 MHz, CDCl<sub>3</sub>) δ ppm 7.93 (s, 1H), 7.86 (d, *J* = 7.9 Hz, 1H), 7.58 (d, *J* = 8.8 Hz, 2H), 7.54 (ddd, *J* = 8.0, 2.0, 1.0 Hz, 1H), 7.36 (t, *J* = 8.0 Hz, 1H), 7.23 (d, *J* = 8.3 Hz, 2H); **<sup>19</sup>F NMR** (377 MHz, CDCl<sub>3</sub>) δ ppm -57.82 (s, 3F), -109.50 (s, 2F), -113.02 (s, 2F); **<sup>13</sup>C NMR** (101 MHz, CDCl<sub>3</sub>) δ ppm 183.6 (t, *J* = 27.3 Hz), 150.6, 134.2, 133.8, 132.8, 129.1, 128.0 (t, *J* = 6.3 Hz), 127.3 (t, *J* = 3.5 Hz), 127.2 (t, *J* = 24.9 Hz), 119.6, 119.3 (q, *J* = 258.8 Hz), 114.7 (tt, *J* = 255.3, 31.7 Hz), 110.7 (tt, *J* = 266.7, 38.6 Hz);



**IR** (thin film)  $\nu$  1709, 1513, 1255, 1211, 1154, 1079, 980, 879, 748, 672  $\text{cm}^{-1}$ ; **MS** (EI):  $m/z$  400.0  $[\text{M}]^+$ . **HRMS** (EI):  $m/z$  Calculated for  $\text{C}_{16}\text{H}_8\text{ClF}_7\text{O}_2$   $[\text{M}]^+$ : 400.0101; Found: 400.0099.

**2,2,3,3-tetrafluoro-1-(o-tolyl)-3-(4-(trifluoromethoxy)phenyl)propan-1-one (3la)**

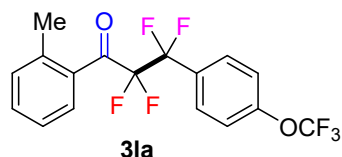

The product mixture was purified by silica gel column chromatography (hexane/EtOAc = 100:1) to afford **3la** (82.1 mg, 54%) as a yellowish liquid;  **$^1\text{H}$  NMR** (600 MHz,  $\text{CDCl}_3$ )  $\delta$  ppm 7.65 (dd,  $J$  = 7.8, 1.2 Hz, 1H), 7.55 (d,  $J$  = 8.8 Hz, 2H), 7.36 (td,  $J$  = 7.6, 1.2 Hz, 1H), 7.22 – 7.17 (m, 4H), 2.31 (s, 3H);  **$^{19}\text{F}$  NMR** (377 MHz,  $\text{CDCl}_3$ )  $\delta$  ppm -57.82 (s, 3F), -109.46 (s, 2F), -113.28 (s, 2F);  **$^{13}\text{C}$  NMR** (101 MHz,  $\text{CDCl}_3$ )  $\delta$  ppm 188.1 (t,  $J$  = 26.7 Hz), 150.5, 138.9, 131.9, 131.7, 131.0, 128.1 (t,  $J$  = 5.6 Hz), 127.9 (t,  $J$  = 6.3 Hz), 119.3 (t,  $J$  = 25.1 Hz), 124.5, 119.5, 119.3 (q,  $J$  = 258.6 Hz), 114.9 (tt,  $J$  = 255.3, 32.0 Hz), 109.9 (tt,  $J$  = 266.7, 38.0 Hz), 19.7; **IR** (thin film)  $\nu$  1708, 1513, 1255, 1211, 1154, 1078, 972, 849, 737, 656  $\text{cm}^{-1}$ ; **MS** (EI):  $m/z$  380.1  $[\text{M}]^+$ . **HRMS** (EI):  $m/z$  Calculated for  $\text{C}_{17}\text{H}_{11}\text{F}_7\text{O}_2$   $[\text{M}]^+$ : 380.0647; Found: 380.0643.

**1-(2-chlorophenyl)-2,2,3,3-tetrafluoro-3-(4-(trifluoromethoxy)phenyl)propan-1-one (3ma)**

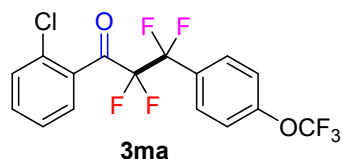

The product mixture was purified by silica gel column chromatography (hexane/EtOAc = 100:1) to afford **3ma** (88.0 mg, 55%) as a colorless liquid;  **$^1\text{H}$  NMR** (400 MHz,  $\text{CDCl}_3$ )  $\delta$  ppm 7.54 (d,  $J$  = 8.8 Hz, 2H), 7.41 (d,  $J$  = 7.7 Hz, 1H), 7.39 – 7.35 (m, 2H), 7.28 – 7.19 (m, 3H);  **$^{19}\text{F}$  NMR** (377 MHz,  $\text{CDCl}_3$ )  $\delta$  ppm -57.84 (s, 3F), -109.68 (s, 2F), -115.31 (s, 2F);  **$^{13}\text{C}$  NMR** (101 MHz,  $\text{CDCl}_3$ )  $\delta$  ppm 187.5 (t,  $J$  = 28.9 Hz), 150.6, 132.9, 131.9, 131.4, 129.8, 128.0 (t,  $J$  = 6.4 Hz), 127.7 (t,  $J$  = 3.1 Hz), 127.1 (t,  $J$  = 24.9 Hz), 125.5, 119.6, 119.3 (q,  $J$  = 258.6 Hz), 114.9 (tt,  $J$  = 255.4, 32.2 Hz), 109.3 (tt,  $J$  = 267.1, 38.5 Hz); **IR** (thin film)  $\nu$  1734, 1513, 1255, 1211,

1156, 1080, 974, 844, 737, 656  $\text{cm}^{-1}$ ; **MS** (EI):  $m/z$  400.0  $[\text{M}]^+$ . **HRMS** (EI):  $m/z$  Calculated for  $\text{C}_{16}\text{H}_8\text{ClF}_7\text{O}_2$   $[\text{M}]^+$ : 400.0101; Found: 400.0102.

**1-(3,5-dimethylphenyl)-2,2,3,3-tetrafluoro-3-(4-(trifluoromethoxy)phenyl)propan-1-one (3na)**

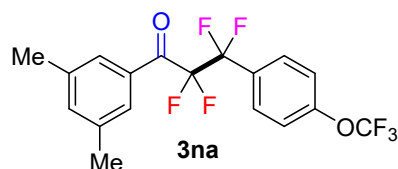

The product mixture was purified by silica gel column chromatography (hexane/EtOAc = 100:1) to afford **3na** (107.2 mg, 68%) as a yellowish liquid;  **$^1\text{H}$  NMR** (400 MHz,  $\text{CDCl}_3$ )  $\delta$  ppm 7.58 – 7.56 (m, 4H), 7.21 (s, 1H), 7.19 (s, 2H);  **$^{19}\text{F}$  NMR** (377 MHz,  $\text{CDCl}_3$ )  $\delta$  ppm -57.83 (s, 3F), -109.68 (s, 2F), -112.70 (s, 2F);  **$^{13}\text{C}$  NMR** (101 MHz,  $\text{CDCl}_3$ )  $\delta$  ppm 184.9 (t,  $J$  = 26.7 Hz), 150.5, 137.5, 135.7, 131.5, 128.0 (t,  $J$  = 6.1 Hz), 127.7 (t,  $J$  = 25.1 Hz), 126.9 (t,  $J$  = 3.3 Hz), 119.5, 119.3 (q,  $J$  = 258.5 Hz), 114.7 (tt,  $J$  = 255.4, 31.7 Hz), 110.9 (tt,  $J$  = 267.7, 37.8 Hz), 20.12; **IR** (thin film)  $\nu$  1701, 1599, 1513, 1255, 1211, 1176, 1082, 909, 786, 674  $\text{cm}^{-1}$ ; **MS** (EI):  $m/z$  394.1  $[\text{M}]^+$ . **HRMS** (EI):  $m/z$  Calculated for  $\text{C}_{18}\text{H}_{13}\text{F}_7\text{O}_2$   $[\text{M}]^+$ : 394.0804; Found: 394.0801.

**1-(3,5-dimethoxyphenyl)-2,2,3,3-tetrafluoro-3-(4-(trifluoromethoxy)phenyl)propan-1-one (3oa)**

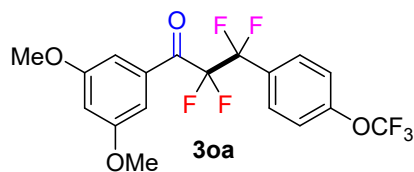

The product mixture was purified by silica gel column chromatography (hexane/EtOAc = 40:1) to afford **3oa** (100.6 mg, 59%) as a colorless liquid;  **$^1\text{H}$  NMR** (400 MHz,  $\text{CDCl}_3$ )  $\delta$  ppm 7.58 (d,  $J$  = 8.8 Hz, 2H), 7.22 (d,  $J$  = 8.3 Hz, 2H), 7.13 – 7.06 (m, 2H), 6.65 (t,  $J$  = 2.3 Hz, 1H), 3.74 (s, 6H);  **$^{19}\text{F}$  NMR** (377 MHz,  $\text{CDCl}_3$ )  $\delta$  ppm -57.83 (s, 3F), -109.52 (s, 2F), -112.49 (s, 2F);  **$^{13}\text{C}$  NMR** (101 MHz,  $\text{CDCl}_3$ )  $\delta$  ppm 184.2 (t,  $J$  = 26.8 Hz), 159.8, 150.5, 132.9, 128.0 (t,  $J$  = 6.4 Hz), 127.5 (t,  $J$  = 25.0 Hz), 119.5, 119.3 (q,  $J$  = 258.6 Hz), 114.7 (tt,  $J$  = 255.6, 31.7 Hz), 110.8 (tt,  $J$  = 266.9, 38.0 Hz), 107.0 (t,  $J$  = 3.5 Hz), 106.4, 54.6; **IR** (thin film)  $\nu$  1704, 1593, 1458,

1254, 1206, 1157, 993, 849, 786, 673  $\text{cm}^{-1}$ ; **MS** (ESI):  $m/z$  427.1  $[\text{M}+\text{H}]^+$ . **HRMS** (ESI):  $m/z$  Calculated for  $\text{C}_{18}\text{H}_{14}\text{F}_7\text{O}_4$   $[\text{M}+\text{H}]^+$ : 427.0775; Found: 427.0776.

**2,2,3,3-tetrafluoro-1-(naphthalen-2-yl)-3-(4-(trifluoromethoxy)phenyl)propan-1-one (3pa)**

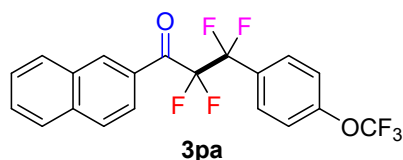

The product mixture was purified by silica gel column chromatography (hexane/EtOAc = 80:1) to afford **3pa** (104.8 mg, 63%) as a yellowish liquid.  **$^1\text{H}$  NMR** (400 MHz,  $\text{CDCl}_3$ )  $\delta$  ppm 8.53 (s, 1H), 7.93 (dd,  $J$  = 8.7, 1.2 Hz, 1H), 7.85 (d,  $J$  = 8.1 Hz, 1H), 7.80 – 7.72 (m, 2H), 7.59 (d,  $J$  = 8.8 Hz, 2H), 7.53 (ddd,  $J$  = 8.2, 6.9, 1.3 Hz, 1H), 7.48 – 7.42 (m, 1H), 7.20 (d,  $J$  = 8.3 Hz, 2H);  **$^{19}\text{F}$  NMR** (377 MHz,  $\text{CDCl}_3$ )  $\delta$  ppm -57.76 (s, 3F), -109.43 (s, 2F), -112.25 (s, 2F);  **$^{13}\text{C}$  NMR** (101 MHz,  $\text{CDCl}_3$ ) 184.4 (t,  $J$  = 26.7 Hz), 150.5, 135.2, 132.3 (t,  $J$  = 4.6 Hz), 131.2, 129.2, 128.8, 128.6, 128.0 (t,  $J$  = 6.4 Hz), 127.7, 127.5 (t,  $J$  = 24.9 Hz), 126.7, 126.2, 123.6, 119.5, 119.3 (q,  $J$  = 258.6 Hz), 114.8 (tt,  $J$  = 255.5, 31.6 Hz), 111.1 (tt,  $J$  = 266.8, 38.0 Hz); **IR** (thin film)  $\nu$  1697, 1627, 1513, 1255, 1211, 1149, 979, 799, 776, 699  $\text{cm}^{-1}$ ; **MS** (EI):  $m/z$  416.1  $[\text{M}]^+$ . **HRMS** (EI):  $m/z$  Calculated for  $\text{C}_{20}\text{H}_{11}\text{F}_7\text{O}_2$   $[\text{M}]^+$ : 416.0647; Found: 416.0648.

**1-(2,3-dihydrobenzo[*b*][1,4]dioxin-6-yl)-2,2,3,3-tetrafluoro-3-(4-(trifluoromethoxy)phenyl)propan-1-one (3qa)**

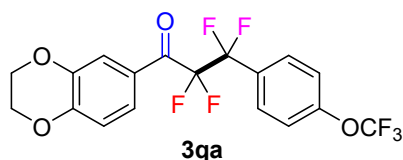

The product mixture was purified by silica gel column chromatography (hexane/EtOAc = 50:1) to afford **3qa** (88.2 mg, 52%) as a light yellow solid, m.p. 60–62  $^{\circ}\text{C}$ ;  **$^1\text{H}$  NMR** (400 MHz,  $\text{CDCl}_3$ )  $\delta$  ppm 7.61 – 7.50 (m, 4H), 7.22 (d,  $J$  = 8.4 Hz, 2H), 6.84 (d,  $J$  = 8.7 Hz, 1H), 4.27 – 4.23 (m, 2H), 4.21 – 4.17 (m, 2H);  **$^{19}\text{F}$  NMR** (377 MHz,  $\text{CDCl}_3$ )  $\delta$  ppm -57.79 (s, 3F), -109.60 (s, 2F), -112.52 (s, 2F);  **$^{13}\text{C}$  NMR** (101 MHz,  $\text{CDCl}_3$ )  $\delta$  ppm 182.6 (t,  $J$  = 26.3 Hz), 150.4, 148.9, 142.4, 127.9 (t,  $J$  = 6.5

Hz), 127.6 (t,  $J = 25.0$  Hz), 124.9, 123.9 (t,  $J = 3.7$  Hz), 119.5, 119.3 (q,  $J = 258.6$  Hz), 118.9 (t,  $J = 3.4$  Hz), 116.5, 114.7 (tt,  $J = 255.2, 32.0$  Hz), 111.0 (tt,  $J = 266.2, 38.0$  Hz), 63.9, 63.0; **IR** (thin film)  $\nu$  1698, 1605, 1508, 1305, 1252, 1122, 887, 732, 663, 620  $\text{cm}^{-1}$ ; **MS** (ESI):  $m/z$  447.0  $[\text{M}+\text{Na}]^+$ . **HRMS** (ESI):  $m/z$  Calculated for  $\text{C}_{18}\text{H}_{11}\text{F}_7\text{NaO}_4$   $[\text{M}+\text{Na}]^+$ : 447.0438; Found: 447.0440.

### 2,2,3,3-tetrafluoro-1,3-diphenylpropan-1-one (3ab)

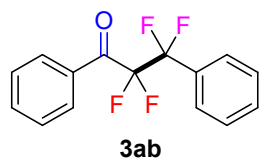

The product mixture was purified by silica gel column chromatography (hexane/EtOAc = 100:1) to afford **3ab** (67.7 mg, 60%) as a yellowish liquid;  **$^1\text{H}$  NMR** (400 MHz,  $\text{CDCl}_3$ )  $\delta$  ppm 7.98 (d,  $J = 7.6$  Hz, 2H), 7.58 – 7.50 (m, 3H), 7.43 – 7.35 (m, 5H);  **$^{19}\text{F}$  NMR** (377 MHz,  $\text{CDCl}_3$ )  $\delta$  ppm -109.74 (s, 2F), -112.98 (s, 2F);  **$^{13}\text{C}$  NMR** (101 MHz,  $\text{CDCl}_3$ )  $\delta$  ppm 185.0 (t,  $J = 26.5$  Hz), 133.7, 131.6, 130.4, 129.3 (t,  $J = 3.2$  Hz), 128.9 (t,  $J = 24.4$  Hz), 127.7, 127.4, 125.8 (t,  $J = 6.5$  Hz), 115.1 (tt,  $J = 254.7, 31.7$  Hz), 111.1 (tt,  $J = 265.8, 38.9$  Hz); **IR** (thin film)  $\nu$  1700, 1598, 1451, 1297, 1143, 1071, 967, 859, 713, 660  $\text{cm}^{-1}$ ; **MS** (EI):  $m/z$  282.1  $[\text{M}]^+$ . **HRMS** (EI):  $m/z$  Calculated for  $\text{C}_{15}\text{H}_{10}\text{F}_4\text{O}$   $[\text{M}]^+$ : 282.0668; Found: 282.0665.

### 3-(4-(tert-butyl)phenyl)-2,2,3,3-tetrafluoro-1-phenylpropan-1-one (3ac)

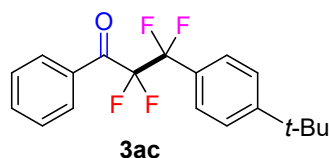

The product mixture was purified by silica gel column chromatography (hexane/EtOAc = 100:1) to afford **3ac** (83.9 mg, 62%) as a white solid, m.p. 59-61  $^{\circ}\text{C}$ ;  **$^1\text{H}$  NMR** (600 MHz,  $\text{CDCl}_3$ )  $\delta$  ppm 7.98 (d,  $J = 7.8$  Hz, 2H), 7.55 (t,  $J = 7.4$  Hz, 1H), 7.46 (d,  $J = 8.5$  Hz, 2H), 7.42 – 7.35 (m, 4H), 1.24 (s, 9H);  **$^{19}\text{F}$  NMR** (377 MHz,  $\text{CDCl}_3$ )  $\delta$  ppm -109.30 (s, 2F), -113.04 (s, 2F);  **$^{13}\text{C}$  NMR** (101 MHz,  $\text{CDCl}_3$ )  $\delta$  ppm 186.2 (t,  $J = 26.6$  Hz), 154.8, 134.7, 132.8, 130.4 (t,  $J = 3.4$  Hz), 128.7, 127.0 (t,  $J = 24.5$  Hz), 126.7 (t,  $J = 6.2$  Hz), 125.5, 116.3 (tt,  $J = 254.5, 31.9$  Hz), 112.3 (tt,  $J = 265.6, 39.6$  Hz), 34.9, 31.2; **IR** (thin film)  $\nu$  1705, 1598, 1451, 1312, 1272, 1145,

1081, 846, 791, 661  $\text{cm}^{-1}$ ; **MS** (EI):  $m/z$  338.1  $[\text{M}]^+$ . **HRMS** (EI):  $m/z$  Calculated for  $\text{C}_{19}\text{H}_{18}\text{F}_4\text{O}$   $[\text{M}]^+$ : 338.1294; Found: 338.1292.

### 2,2,3,3-tetrafluoro-3-(4-fluorophenyl)-1-phenylpropan-1-one (3ad)

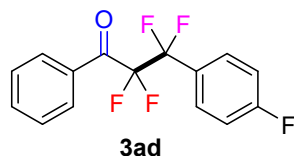

The product mixture was purified by silica gel column chromatography (hexane/EtOAc = 100:1) to afford **3ad** (79.2 mg, 66%) as a yellowish liquid.  **$^1\text{H}$  NMR** (400 MHz,  $\text{CDCl}_3$ )  $\delta$  ppm 7.98 (d,  $J = 7.6$  Hz, 2H), 7.58 – 7.51 (m, 3H), 7.44 – 7.35 (m, 2H), 7.06 (t,  $J = 8.6$  Hz, 2H);  **$^{19}\text{F}$  NMR** (377 MHz,  $\text{CDCl}_3$ )  $\delta$  ppm -108.23 – -108.30 (m, 1F), -109.03 (s, 2F), -112.92 (s, 2F);  **$^{13}\text{C}$  NMR** (151 MHz,  $\text{CDCl}_3$ )  $\delta$  ppm 184.8 (t,  $J = 26.8$  Hz), 163.6 (d,  $J = 251.8$  Hz), 133.8, 131.5, 129.3 (t,  $J = 3.4$  Hz), 128.3 (dt,  $J = 8.5, 6.7$  Hz), 127.7, 124.9 (td,  $J = 25.1, 3.4$  Hz), 114.9 (tt,  $J = 254.9, 31.9$  Hz), 114.7 (d,  $J = 22.1$  Hz), 110.9 (tt,  $J = 266.2, 38.8$  Hz); **IR** (thin film)  $\nu$  1701, 1598, 1515, 1299, 1236, 1145, 1077, 970, 838, 685  $\text{cm}^{-1}$ ; **MS** (EI):  $m/z$  300.1  $[\text{M}]^+$ . **HRMS** (EI):  $m/z$  Calculated for  $\text{C}_{15}\text{H}_9\text{F}_5\text{O}$   $[\text{M}]^+$ : 300.0574; Found: 300.0573.

### 3-(4-chlorophenyl)-2,2,3,3-tetrafluoro-1-phenylpropan-1-one (3ae)

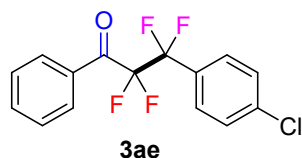

The product mixture was purified by silica gel column chromatography (hexane/EtOAc = 100:1) to afford **3ae** (56.9 mg, 45%) as a yellowish liquid;  **$^1\text{H}$  NMR** (400 MHz,  $\text{CDCl}_3$ )  $\delta$  ppm 7.99 (d,  $J = 7.6$  Hz, 2H), 7.62 – 7.55 (m, 1H), 7.48 (d,  $J = 8.6$  Hz, 2H), 7.45 – 7.40 (m, 2H), 7.37 (d,  $J = 8.7$  Hz, 2H);  **$^{19}\text{F}$  NMR** (377 MHz,  $\text{CDCl}_3$ )  $\delta$  ppm -109.73 (s, 2F), -112.88 (s, 2F);  **$^{13}\text{C}$  NMR** (101 MHz,  $\text{CDCl}_3$ )  $\delta$  ppm 184.7 (t,  $J = 26.9$  Hz), 136.9 (t,  $J = 1.9$  Hz), 133.9, 131.4, 129.3 (t,  $J = 3.4$  Hz), 127.8, 127.5, 127.4, 127.3 (t,  $J = 6.6$  Hz), 114.8 (tt,  $J = 255.2, 31.6$  Hz), 110.9 (tt,  $J = 266.7, 38.5$  Hz); **IR** (thin film)  $\nu$  1702, 1598, 1495, 1298, 1146, 1093, 973, 824, 721, 658  $\text{cm}^{-1}$ ; **MS** (EI):  $m/z$  316.0  $[\text{M}]^+$ . **HRMS** (EI):  $m/z$  Calculated for  $\text{C}_{15}\text{H}_9\text{ClF}_4\text{O}$   $[\text{M}]^+$ : 316.0278; Found: 316.0276.

### 2,2,3,3-tetrafluoro-1-phenyl-3-(4-(trifluoromethyl)phenyl)propan-1-one (3af)

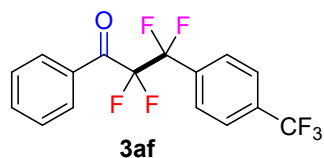

The product mixture was purified by silica gel column chromatography (hexane/EtOAc = 100:1) to afford **3af** (98.0 mg, 70%) as a yellowish liquid; **<sup>1</sup>H NMR** (400 MHz, CDCl<sub>3</sub>) δ ppm 7.99 (d, *J* = 7.6 Hz, 2H), 7.69 – 7.63 (m, 4H), 7.59 – 7.53 (m, 1H), 7.43 – 7.39 (m, 2H); **<sup>19</sup>F NMR** (377 MHz, CDCl<sub>3</sub>) δ ppm -63.16 (s, 2F), -110.32 (s, 2F), -112.75 (s, 2F); **<sup>13</sup>C NMR** (101 MHz, CDCl<sub>3</sub>) δ ppm 184.4 (t, *J* = 26.8 Hz), 134.0, 133.7 (t, *J* = 24.2 Hz), 132.5 (q, *J* = 32.9 Hz), 131.3, 129.3 (t, *J* = 3.4 Hz), 127.8, 126.6 (t, *J* = 6.5 Hz), 124.5 (q, *J* = 3.7 Hz), 122.5 (q, *J* = 272.6 Hz), 114.6 (tt, *J* = 255.7, 31.8 Hz), 110.8 (tt, *J* = 266.9, 37.8 Hz); **IR** (thin film) ν 1702, 1598, 1415, 1324, 1297, 1131, 1066, 976, 834, 662 cm<sup>-1</sup>; **MS** (EI): *m/z* 350.1 [M]<sup>+</sup>. **HRMS** (EI): *m/z* Calculated for C<sub>16</sub>H<sub>9</sub>F<sub>7</sub>O [M]<sup>+</sup>: 350.0542; Found: 350.0541.

### 3-(3-bromophenyl)-2,2,3,3-tetrafluoro-1-phenylpropan-1-one (3ag)

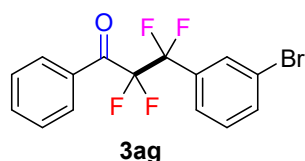

The product mixture was purified by silica gel column chromatography (hexane/EtOAc = 100:1) to afford **3ag** (95.0 mg, 66%) as a yellowish liquid; **<sup>1</sup>H NMR** (400 MHz, CDCl<sub>3</sub>) δ ppm 7.99 (d, *J* = 7.9 Hz, 2H), 7.69 (s, 1H), 7.58 – 7.55 (t, *J* = 6.8 Hz, 2H), 7.48 (d, *J* = 7.8 Hz, 1H), 7.43 – 7.39 (m, 2H), 7.26 (t, *J* = 7.9 Hz, 1H); **<sup>19</sup>F NMR** (377 MHz, CDCl<sub>3</sub>) δ ppm -109.78 (s, 2F), -112.69 (s, 2F); **<sup>13</sup>C NMR** (101 MHz, CDCl<sub>3</sub>) δ ppm 184.5 (t, *J* = 26.7 Hz), 133.9, 133.6, 131.4, 130.9 (t, *J* = 24.7 Hz), 129.3 (t, *J* = 3.2 Hz), 129.1 (t, *J* = 6.7 Hz), 129.0, 127.8, 124.6 (t, *J* = 6.3 Hz), 121.5, 114.3 (tt, *J* = 255.6, 31.8 Hz), 110.8 (tt, *J* = 266.6, 38.4 Hz); **IR** (thin film) ν 1701, 1597, 1293, 1142, 1069, 974, 841, 790, 716, 658 cm<sup>-1</sup>; **MS** (EI): *m/z* 360.0 [M]<sup>+</sup>. **HRMS** (EI): *m/z* Calculated for C<sub>15</sub>H<sub>9</sub>BrF<sub>4</sub>O [M]<sup>+</sup>: 359.9773; Found: 359.7770.

### 2,2,3,3-tetrafluoro-1-phenyl-3-(o-tolyl)propan-1-one (3ah)

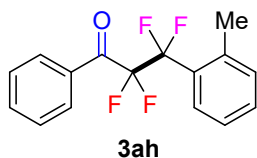

The product mixture was purified by silica gel column chromatography (hexane/EtOAc = 100:1) to afford **3ah** (53.3 mg, 45%) as a yellowish liquid; **<sup>1</sup>H NMR** (400 MHz, CDCl<sub>3</sub>) δ ppm 8.00 (d, *J* = 7.9 Hz, 1H), 7.55 (t, *J* = 7.4 Hz, 1H), 7.42 – 7.38 (m, 3H), 7.30 (t, *J* = 7.5 Hz, 1H), 7.21 – 7.12 (m, 2H), 2.45 (t, *J* = 2.9 Hz, 1H); **<sup>19</sup>F NMR** (377 MHz, CDCl<sub>3</sub>) δ ppm -104.70 (s, 2F), -112.23 (s, 2F); **<sup>13</sup>C NMR** (101 MHz, CDCl<sub>3</sub>) δ ppm 185.2 (t, *J* = 26.4 Hz), 136.9, 133.6, 131.8, 131.4, 130.3, 129.3 (t, *J* = 3.3 Hz), 127.7, 127.4 (t, *J* = 8.8 Hz), 126.8 (t, *J* = 22.4 Hz), 124.7, 116.7 (tt, *J* = 255.5, 33.6 Hz), 111.9 (tt, *J* = 265.5, 40.4 Hz), 19.76 – 19.62 (m); **IR** (thin film) ν 1699, 1597, 1449, 1298, 1140, 1107, 966, 858, 753, 660 cm<sup>-1</sup>; **MS** (EI): *m/z* 296.1 [M]<sup>+</sup>. **HRMS** (EI): *m/z* Calculated for C<sub>16</sub>H<sub>12</sub>F<sub>4</sub>O [M]<sup>+</sup>: 296.0824; Found: 296.0823.

### 3-(3,5-dimethylphenyl)-2,2,3,3-tetrafluoro-1-phenylpropan-1-one (3ai)

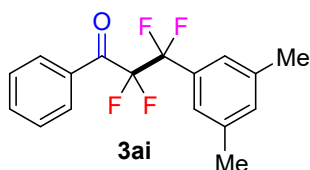

The product mixture was purified by silica gel column chromatography (hexane/EtOAc = 100:1) to afford **3ai** (76.9 mg, 62%) as a white solid, m.p. 61-63 °C; **<sup>1</sup>H NMR** (400 MHz, CDCl<sub>3</sub>) δ ppm ; **<sup>19</sup>F NMR** (377 MHz, CDCl<sub>3</sub>) δ ppm -109.28 (s, 2F), -112.95 (s, 2F); **<sup>13</sup>C NMR** (101 MHz, CDCl<sub>3</sub>) δ ppm 185.1 (t, *J* = 26.5 Hz), 137.2, 133.6, 132.1, 131.8, 129.3, 129.2 (t, *J* = 3.0 Hz), 128.7 (t, *J* = 23.9 Hz), 127.6, 123.5 (t, *J* = 6.3 Hz), 115.2 (tt, *J* = 254.5, 31.9 Hz), 111.2 (tt, *J* = 265.4, 39.5 Hz), 20.2; **IR** (thin film) ν 1689, 1597, 1449, 1327, 1297, 1131, 1066, 976, 834, 662 cm<sup>-1</sup>; **MS** (EI): *m/z* 310.1 [M]<sup>+</sup>. **HRMS** (EI): *m/z* Calculated for C<sub>17</sub>H<sub>14</sub>F<sub>4</sub>O [M]<sup>+</sup>: 310.0981; Found: 310.0980.

### 2,2,3,3-tetrafluoro-3-(perfluorophenyl)-1-phenylpropan-1-one (3aj)

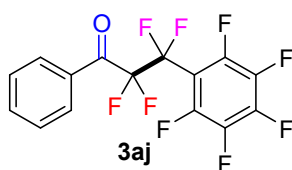

The product mixture was purified by silica gel column chromatography (hexane/EtOAc = 100:1) to afford **3aj** (99.7 mg, 67%) as a white solid, m.p. 61-63 °C; **<sup>1</sup>H NMR** (400 MHz, CDCl<sub>3</sub>) δ ppm 8.01 (d, *J* = 7.8 Hz, 1H), 7.60 (t, *J* = 7.4 Hz, 1H), 7.44 (t, *J* = 7.8 Hz, 2H); **<sup>19</sup>F NMR** (377 MHz, CDCl<sub>3</sub>) δ ppm -106.01 (t, *J* = 30.6 Hz, 2F), -113.90 (t, *J* = 7.8 Hz, 2F), -136.95 – -137.38 (m, 2F), -146.85 (tt, *J* = 21.1, 5.5 Hz, 1F), -159.68 – -159.88 (m, 2F); **<sup>13</sup>C NMR** (101 MHz, CDCl<sub>3</sub>) δ ppm 184.0 (t, *J* = 26.0 Hz), 146.1 – 143.2 (m), 144.0 – 143.2 (m), 138.4 – 135.6 (m), 134.2, 131.1, 129.3 (t, *J* = 3.4 Hz), 127.9, 113.5 (tt, *J* = 260.8, 35.4 Hz), 110.6 (tt, *J* = 267.8, 36.7 Hz), 104.3 – 103.6 (m); **IR** (thin film) ν 1698, 1505, 1332, 1282, 1138, 1092, 985, 894, 732, 623 cm<sup>-1</sup>; **MS** (EI): *m/z* 372.0 [M]<sup>+</sup>. **HRMS** (EI): *m/z* Calculated for C<sub>15</sub>H<sub>5</sub>F<sub>9</sub>O [M]<sup>+</sup>: 372.0197; Found: 372.0185.

### 3-cyclopentyl-2,2,3,3-tetrafluoro-1-phenylpropan-1-one (3ak)

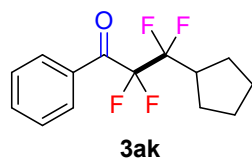

The product mixture was purified by silica gel column chromatography (hexane/EtOAc = 100:1) to afford **3ak** (61.4 mg, 56%) as a yellowish liquid; **<sup>1</sup>H NMR** (400 MHz, CDCl<sub>3</sub>) δ ppm 8.00 (d, *J* = 7.9 Hz, 2H), 7.56 (t, *J* = 7.4 Hz, 1H), 7.41 (t, *J* = 7.8 Hz, 2H), 2.71 – 2.39 (m, 1H), 1.85 – 1.77 (m, 2H), 1.69 – 1.48 (m, 6H); **<sup>19</sup>F NMR** (377 MHz, CDCl<sub>3</sub>) δ ppm -112.83 (s, 2F), -115.63 (d, *J* = 16.6 Hz); **<sup>13</sup>C NMR** (101 MHz, CDCl<sub>3</sub>) δ ppm 185.8 (t, *J* = 26.3 Hz), 133.6, 131.7, 129.4 (t, *J* = 3.1 Hz), 127.6, 118.4 (tt, *J* = 253.3, 31.6 Hz), 112.0 (tt, *J* = 264.7, 38.0 Hz), 40.2 (t, *J* = 21.8 Hz), 24.9 (t, *J* = 3.8 Hz), 24.5; **IR** (thin film) ν 1703, 1598, 1449, 1286, 1133, 1067, 912, 845, 713, 662 cm<sup>-1</sup>; **MS** (EI): *m/z* 274.1 [M]<sup>+</sup>. **HRMS** (EI): *m/z* Calculated for C<sub>14</sub>H<sub>14</sub>F<sub>4</sub>O [M]<sup>+</sup>: 274.0981; Found: 274.0980.

### 3-cyclohexyl-2,2,3,3-tetrafluoro-1-phenylpropan-1-one (3al)

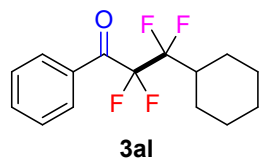

The product mixture was purified by silica gel column chromatography (hexane/EtOAc = 100:1) to afford **3al** (72.6 mg, 63%) as a yellowish liquid; **<sup>1</sup>H NMR**



(400 MHz, CDCl<sub>3</sub>)  $\delta$  ppm 8.00 (d,  $J$  = 7.9 Hz, 2H), 7.56 (t,  $J$  = 7.4 Hz, 1H), 7.41 (t,  $J$  = 7.7 Hz, 2H), 2.20 – 2.06 (m, 1H), 1.93 – 1.90 (m, 2H), 1.76 – 1.74 (m, 2H), 1.33 – 1.07 (m, 6H); **<sup>19</sup>F NMR** (377 MHz, CDCl<sub>3</sub>)  $\delta$  ppm -111.75 (s, 2F), -116.22 (d,  $J$  = 15.2 Hz, 2F); **<sup>13</sup>C NMR** (101 MHz, CDCl<sub>3</sub>)  $\delta$  ppm 185.6 (t,  $J$  = 26.6 Hz), 133.6, 131.6, 129.4 (t,  $J$  = 3.0 Hz), 127.6, 117.8 (tt,  $J$  = 254.6, 31.1 Hz), 112.4 (tt,  $J$  = 265.7, 38.6 Hz), 39.6 (t,  $J$  = 21.2 Hz), 24.7, 24.4, 23.9 – 23.3 (m); **IR** (thin film)  $\nu$  1704, 1598, 1449, 1284, 1143, 1072, 898, 812, 713, 660 cm<sup>-1</sup>; **MS** (EI):  $m/z$  288.1 [M]<sup>+</sup>. **HRMS** (EI):  $m/z$  Calculated for C<sub>15</sub>H<sub>16</sub>F<sub>4</sub>O [M]<sup>+</sup>: 288.1137; Found: 288.1134.

## 5. Transformation of compound **3ac**.

### 5.1 Reduction of compound **3ac**

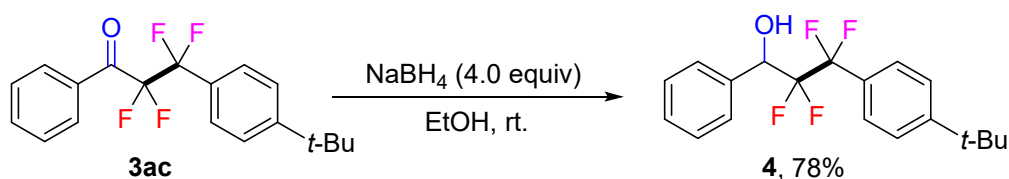

To a solution of compound **3ac** (67.6 mg, 0.20 mmol, 1.0 equiv) in EtOH (2 mL) was added NaBH<sub>4</sub> (30.4 mg, 0.8 mmol, 4.0 equiv) at room temperature. After the reaction was stirred for 2 h, aqueous solution HCl (1 M) was added. The resulting mixture was extracted with ethyl acetate. The combined organic layers were dried over anhydrous Na<sub>2</sub>SO<sub>4</sub>, filtered and the solvent was removed under reduced pressure. The crude mixture was purified by silica gel column chromatography (hexane/EtOAc = 8: 1) to give product **4** (53.1 mg, 78%) a colorless oil. <sup>1</sup>H NMR (400 MHz, CDCl<sub>3</sub>) δ ppm 7.42 – 7.29 (m, 6H), 7.26 – 7.20 (m, 3H), 5.02 (dd, *J* = 17.0, 7.3 Hz, 1H), 2.75 (brs, 1H), 1.22 (s, 9H); <sup>19</sup>F NMR (377 MHz, CDCl<sub>3</sub>) δ ppm -108.95 (d, *J* = 4.2 Hz, 2F), -117.73 (dd, *J* = 275.1, 7.3 Hz, 1F), -126.51 (dd, *J* = 275.1, 16.9 Hz, 1F); <sup>13</sup>C NMR (101 MHz, CDCl<sub>3</sub>) δ ppm 153.3, 134.3, 128.0, 127.2, 127.1, 126.9 (t, *J* = 24.8 Hz), 125.4 (t, *J* = 6.4 Hz), 124.2, 116.4 (tt, *J* = 253.4, 34.2 Hz), 114.4 (ddt, *J* = 260.9, 35.8, 6.0 Hz), 71.1 (dd, *J* = 28.6, 22.8 Hz), 33.8, 30.1; IR (thin film) ν 2966, 1615, 1457, 1290, 1100, 943, 834, 711, 613 cm<sup>-1</sup>; MS (ESI): *m/z* 363.1 [M+Na]<sup>+</sup>; HRMS (ESI-TOF): *m/z* Calculated for C<sub>19</sub>H<sub>20</sub>F<sub>4</sub>NaO [M+Na]<sup>+</sup>: 363.1342; Found: 363.1340.

### 5.2 Grignard reaction of compound **3ac**

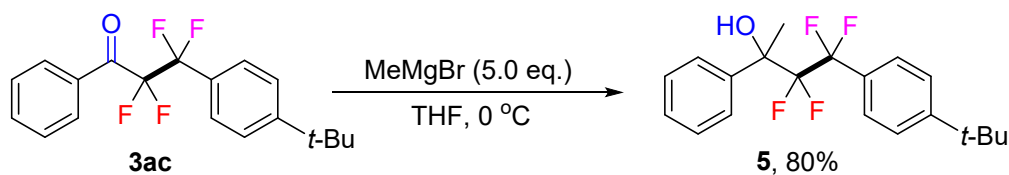

To a 25 mL oven-dried Schlenk tube equipped with a magnetic stirrer bar was added compound **3ac** (67.6 mg, 0.2 mmol, 1.0 equiv.), the tube was evacuated and backfilled with argon three times, followed by anhydrous THF (2.0 mL) were added. The solution was cooled to 0 °C and methylmagnesium bromide (1.0 mL, 1.0 mol/L in THF) was added dropwise. The reaction was allowed to stir at 0 °C for 10 hours. The reaction was then quenched with saturated NH<sub>4</sub>Cl (aq.), and extracted with dichloromethane three times. The combined organic layers were washed with brine, dried over anhydrous Na<sub>2</sub>SO<sub>4</sub>, filtered and the solvent was removed under reduced pressure. The crude mixture was purified by silica gel column chromatography (hexane/EtOAc = 10: 1) to provide **5** (56.7 mg, 80%) as a colorless oil; <sup>1</sup>H NMR (400 MHz, CDCl<sub>3</sub>) δ ppm 7.43 (d, *J* = 7.5 Hz, 2H), 7.31 – 7.25 (m, 4H), 7.24 – 7.13 (m, 3H), 2.48 (brs, 1H), 1.69 (s, 3H), 1.20 (s, 9H); <sup>19</sup>F NMR (377 MHz, CDCl<sub>3</sub>) δ ppm - 105.6 (AB, *J* = 265.2 Hz, 2F), -117.1 (AB, *J* = 279.0 Hz, 2F); <sup>13</sup>C NMR (101 MHz, CDCl<sub>3</sub>) δ ppm 152.9, 139.2, 127.8 (t, *J* = 24.9 Hz), 126.8, 126.8, 125.4 (t, *J* = 6.5 Hz), 125.2, 124.0, 117.1 (tt, *J* = 255.3, 34.8 Hz), 115.5 (tt, *J* = 261.4, 35.0 Hz), 75.2 (t, *J* = 24.8 Hz), 33.7, 30.1, 24.3; IR (thin film) ν 2965, 1615, 1449, 1286, 1100, 911, 833, 762, 699 cm<sup>-1</sup>; MS (ESI): *m/z* 377.1 [M+Na]<sup>+</sup>; HRMS (ESI-TOF): *m/z* Calculated for C<sub>12</sub>H<sub>13</sub>F<sub>2</sub>NNaO<sub>2</sub> [M+Na]<sup>+</sup>: 377.1499; Found: 377.1498.

### 5.3 Haller-Bauer reaction of compound **3ac**

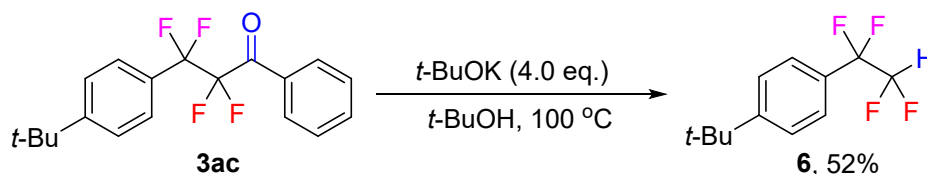

To a 25 mL sealed tube equipped with a magnetic stirrer bar was added compound **3ac** (135.2 mg, 0.4 mmol, 1.0 equiv.), *t*-BuOK (179.4 mg, 1.6 mmol, 4.0 eq.), the tube was evacuated and backfilled with argon three times, followed by *t*-BuOH (4.0 mL) were added. The reaction was allowed to stir at 100 °C in an oil bath for 6 hours. After that, the reaction mixture was cooled to room temperature, then quenched with saturated NH<sub>4</sub>Cl (aq.), and extracted with dichloromethane three times. The combined organic layers were washed with brine, dried over anhydrous Na<sub>2</sub>SO<sub>4</sub>, filtered and the solvent was removed under reduced pressure. The crude mixture was purified by silica gel column chromatography (hexane/EtOAc = 100: 1) to provide **6** (48.7 mg, 52%) as a yellowish liquid; <sup>1</sup>H NMR (400 MHz, CDCl<sub>3</sub>) δ ppm 7.44 – 7.38 (m, 4H), 5.82 (tt, *J* = 54.2, 2.6 Hz, 1H), 1.26 (s, 9H); <sup>19</sup>F NMR (377 MHz, CDCl<sub>3</sub>) δ ppm -

113.40 – -113.50 (m, 2F), -134.24 (dt,  $J = 54.1$ , 4.1 Hz, 2F);  $^{13}\text{C}$  NMR (101 MHz,  $\text{CDCl}_3$ )  $\delta$  ppm 153.6, 125.9 (t,  $J = 24.5$  Hz), 125.1 (t,  $J = 6.3$  Hz), 124.5, 114.6 (tt,  $J = 248.8$ , 28.7 Hz), 109.3 (tt,  $J = 251.4$ , 43.7 Hz), 33.8, 30.1 ; **IR** (thin film)  $\nu$  2960, 1601, 1384, 1283, 1217, 1101, 991, 815, 676  $\text{cm}^{-1}$ . Known compound<sup>5</sup>.

#### 5.4 Wittig reaction of compound 3ac

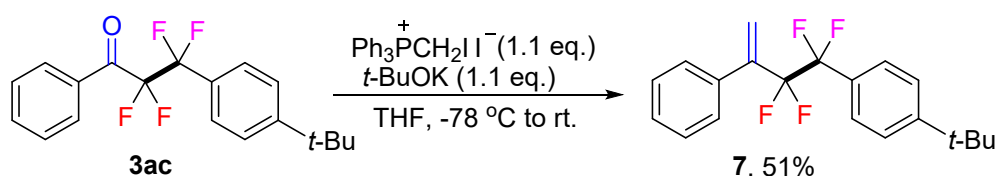

To a 25 mL flask equipped with a magnetic stirrer bar was charged with  $\text{Ph}_3\text{P}^+\text{CH}_2\text{I}^-$  (233.3 mg, 0.44 mmol, 1.1 eq.), anhydrous THF (2.0 mL).  $t\text{-BuOK}$  (233.3 mg, 0.44 mmol, 1.1 eq.) was added portionwise and the resulting yellow solution was stirred for 1 h before cooling to  $-78^\circ\text{C}$ . compound **3ac** (135.2 mg, 0.4 mmol, 1.0 equiv.) in anhydrous THF was added dropwise and the reaction mixture was allowed to warm to ambient temperature and was stirred overnight. water was added and extracted with EtOAc three times. The combined organic layers were washed with brine, dried over anhydrous  $\text{Na}_2\text{SO}_4$ , filtered and the solvent was removed under reduced pressure. The crude mixture was purified by silica gel column chromatography (hexane/EtOAc = 100: 1) to provide **7** (68.6 mg, 51%) as a yellow oil;  $^1\text{H}$  NMR (400 MHz,  $\text{CDCl}_3$ )  $\delta$  ppm 7.36 – 7.30 (m, 4H), 7.24 – 7.22 (m, 5H), 5.74 (s, 1H), 5.58 (s, 1H), 1.24 (s, 9H);  $^{19}\text{F}$  NMR (377 MHz,  $\text{CDCl}_3$ )  $\delta$  ppm -109.23 (s, 2F), -109.52 (s, 2F);  $^{13}\text{C}$  NMR (101 MHz,  $\text{CDCl}_3$ )  $\delta$  ppm 153.1, 139.5 (t,  $J = 22.8$  Hz), 139.2, 135.5, 127.6, 127.1, 127.0, 125.6 (t,  $J = 6.1$  Hz), 124.0, 122.9 (t,  $J = 8.6$  Hz), 115.9 (tt,  $J = 253.0$ , 33.9 Hz), 115.1 (tt,  $J = 255.2$ , 37.0 Hz), 33.7, 30.1; **IR** (thin film)  $\nu$  2965, 1285, 1223, 1101, 1074, 1017, 939, 833, 774, 697  $\text{cm}^{-1}$ ; **MS** (EI):  $m/z$  336.1  $[\text{M}]^+$ . **HRMS** (EI):  $m/z$  Calculated for  $\text{C}_{20}\text{H}_{20}\text{F}_4$   $[\text{M}]^+$ : 336.1501; Found: 336.1500.

#### 5.5 Deoxofluorination of compound 3ac

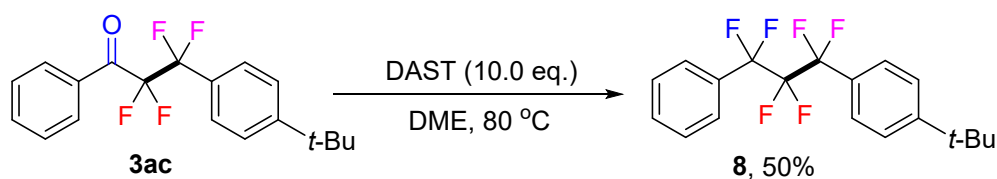

To a 25 mL oven-dried Schlenk tube equipped with a magnetic stirrer bar was added compound **3ac** (135.2 mg, 0.4 mmol, 1.0 equiv.), the tube was evacuated and backfilled with argon three times, followed by anhydrous DME (2.0 mL) were added. The solution was cooled to -78 °C and DAST (645 mg, 4 mmol) was added dropwise with stirring. The reaction was stirred at room temperature for 10 min, then slowly heated to 80 °C and stirred for 12 hours. After cooling to room temperature, the reaction was quenched with saturated NaHCO<sub>3</sub> (aq.), and extracted with dichloromethane three times. The combined organic phase were washed with aqueous HCl (2 M), dried over anhydrous Na<sub>2</sub>SO<sub>4</sub>, filtered and concentrated under reduced pressure. The residue was purified by column chromatography (hexane/EtOAc = 100: 1) to afford product **8** (72.0 mg, 50%) as a yellow oil; <sup>1</sup>H NMR (400 MHz, CDCl<sub>3</sub>) δ ppm 7.91 – 7.87 (m, 1H), 7.77 (dd, *J* = 4.9, 1.0 Hz, 1H), 7.62 – 7.53 (m, 2H), 7.43 – 7.36 (m, 1H), 7.34 – 7.27 (m, 2H), 7.12 (dd, *J* = 4.9, 4.1 Hz, 1H); <sup>19</sup>F NMR (377 MHz, CDCl<sub>3</sub>) δ ppm -86.48 (t, *J* = 6.4 Hz, 2F), -112.37 (s, 2F); <sup>13</sup>C NMR (101 MHz, CDCl<sub>3</sub>) δ ppm 176.8 (t, *J* = 27.8 Hz), 137.6, 136.7, 136.2, 135.8 (t, *J* = 5.5 Hz), 129.7, 128.3, 128.0, 122.3 (t, *J* = 2.3 Hz), 121.9 (tt, *J* = 290.9, 34.3 Hz), 111.6 (tt, *J* = 267.1, 34.7 Hz); IR (thin film) ν 3106, 2248, 1672, 1410, 1356, 1183, 1061, 837, 730, 700 cm<sup>-1</sup>; MS (EI): *m/z* 360.1 [M]<sup>+</sup>. [M]<sup>+</sup>. HRMS (EI): *m/z* Calculated for C<sub>19</sub>H<sub>18</sub>F<sub>6</sub> [M]<sup>+</sup>: 360.1313; Found: 360.1310.

## 5.6 Amination of compound **3ac**

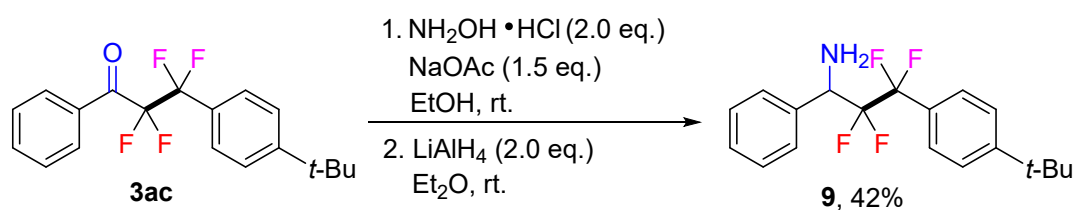

To a 25 mL flask equipped with a magnetic stirrer bar was added compound **3ac** (135.2 mg, 0.4 mmol, 1.0 equiv.), hydroxylamine hydrochloride (55.6 mg, 0.8 mmol, 2.0 equiv), NaOAc (49.2 mg, 0.6 mmol, 1.5 eq.), followed by EtOH (4.0 mL) were added. After stirring for 2 h, the solvent was evaporated under reduced pressure. Anhydrous Et<sub>2</sub>O (4.0 mL) was added, then LiAlH<sub>4</sub> (30.4 mg, 0.8 mmol, 2.0 eq.) was added in one portion. After stirring for 2 h, the reaction was quenched with saturated NH<sub>4</sub>Cl (aq.), and extracted with Et<sub>2</sub>O three times. The combined organic phase were washed with brine, dried over anhydrous Na<sub>2</sub>SO<sub>4</sub>, filtered and concentrated under reduced pressure. The residue was purified by column chromatography (hexane/EtOAc = 10: 1) to afford product **9** (57.0 mg, 42%) as a yellowish liquid; <sup>1</sup>H

**NMR** (400 MHz, CDCl<sub>3</sub>)  $\delta$  ppm 7.37 – 7.32 (m, 6H), 7.30 – 7.25 (m, 3H), 5.06 (brs, 2H), 4.58 (t,  $J$  = 13.4 Hz, 1H), 1.25 (s, 9H); **<sup>19</sup>F NMR** (377 MHz, CDCl<sub>3</sub>)  $\delta$  ppm - 108.5 (dt,  $J$  = 265.7, 5.1 Hz, 1F), -109.4 (dt,  $J$  = 265.7, 3.9 Hz, 1F), -115.6 (dd,  $J$  = 276.6, 13.9 Hz, 1F), -118.6 (dd,  $J$  = 276.7, 12.5 Hz, 1F); **<sup>13</sup>C NMR** (101 MHz, CDCl<sub>3</sub>)  $\delta$  ppm 153.3, 132.6 (d,  $J$  = 2.9 Hz), 128.3, 127.9, 127.4, 126.6 (t,  $J$  = 24.8 Hz), 125.5 (t,  $J$  = 6.3 Hz), 124.2, 116.2 (tt,  $J$  = 269.5, 34.7 Hz), 114.6 (tt,  $J$  = 259.3, 17.3 Hz), 65.9 (dd,  $J$  = 22.7, 20.0 Hz), 33.8, 30.1; **IR** (thin film)  $\nu$  3284, 1290, 1186, 1141, 1101, 1015, 894, 830, 749, 665 cm<sup>-1</sup>; **MS** (ESI):  $m/z$  362.1 [M+Na]<sup>+</sup>; **HRMS** (ESI-TOF):  $m/z$  Calculated for C<sub>19</sub>H<sub>21</sub>F<sub>4</sub>NNa [M+Na]<sup>+</sup>: 362.1502; Found: 362.1501.

### 5.7 late-stage functionalization

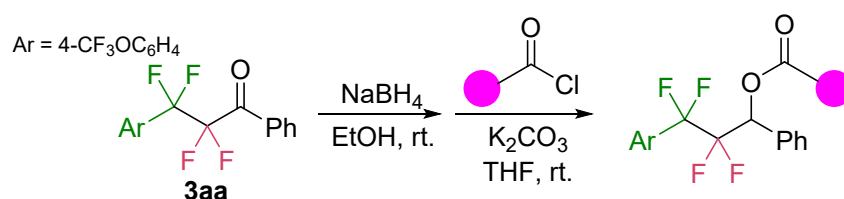

To a solution of compound **3aa** (146.4 mg, 0.4 mmol, 1.0 equiv) in EtOH (2 mL) was added NaBH<sub>4</sub> (60.8 mg, 1.6 mmol, 4.0 equiv) at room temperature. After the reaction was stirred for 2 h, aqueous solution HCl (1 M) was added. The resulting mixture was extracted with ethyl acetate. The combined organic layers were dried over anhydrous Na<sub>2</sub>SO<sub>4</sub>, filtered and the solvent was removed under reduced pressure. The obtained mixture was used in the next step without further purification.

To a solution of carboxylic acid (0.4 mmol, 1.0 equiv) in DCM (2 mL) was added oxalyl chloride (152.3 mg, 1.2 mmol, 3.0 equiv) at room temperature. Then 1 drop of DMF was added and the reaction mixture was stirred for 2 h. The solvent was removed under reduced pressure. The obtained mixture was used in the next step without further purification.

To a 25 mL flask equipped with a magnetic stirrer bar was added the fluorinated alcohol, K<sub>2</sub>CO<sub>3</sub> (55.2 mg, 0.4 mmol, 1.0 equiv), followed by THF (4.0 mL) were added. The mixture was cooled to 0°C for 10 min, then the freshly prepared acyl chloride in 2 mL THF was added dropwise. After stirring for 2 h at room temperature, the solvent was evaporated under reduced pressure. The obtained residue was added 10 mL H<sub>2</sub>O, and extracted with EA three times. The combined organic phase were washed with brine, dried over anhydrous Na<sub>2</sub>SO<sub>4</sub>, filtered and concentrated under reduced pressure. The residue was purified by column chromatography to afford the product.

**2,2,3,3-tetrafluoro-1-phenyl-3-(4-(trifluoromethoxy)phenyl)propyl**  
**isobutylphenyl)propanoate (10)**

**2-(4-**

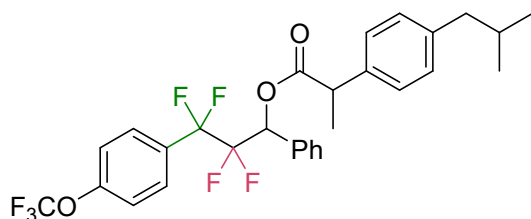

The product mixture was purified by silica gel column chromatography (hexane/EA = 30:1) to afford **10** (186.9 mg, 84%) as a colorless liquid;  $^1\text{H NMR}$  (400 MHz,  $\text{CDCl}_3$ )  $\delta$  7.44 (d,  $J = 8.6$  Hz, 1.38H), 7.30–7.24 (m, 1.31H), 7.23–7.19 (m, 0.93H), 7.16–7.12 (m, 2.73H), 7.08–7.05 (m, 2.04H), 7.02–7.00 (m, 1.98H), 6.96–6.92 (m, 2.73H), 6.16 (dd,  $J = 18.2, 6.6$  Hz, 0.69H), 6.09 (dd,  $J = 18.0, 6.5$  Hz, 0.34H), 3.68 (q,  $J = 7.1$  Hz, 0.33H), 3.48 (q,  $J = 7.1$  Hz, 0.68H), 2.35 (d,  $J = 7.1$  Hz, 0.67H), 2.33 (d,  $J = 7.1$  Hz, 1.34H), 1.78–1.68 (m, 1.06H), 1.39 (d,  $J = 7.2$  Hz, 1.1H), 1.36 (d,  $J = 7.2$  Hz, 1.97H), 0.78 (d,  $J = 6.8$  Hz, 4.13H), 0.76 (d,  $J = 6.8$  Hz, 2.06H);  $^{19}\text{F NMR}$  (377 MHz,  $\text{CDCl}_3$ )  $\delta$  ppm -57.8 (s, 3F), -109.7 (ddt,  $J = 312.9, 269.1, 3.8$  Hz, 0.67F), -109.9 (qt,  $J = 268.4, 5.9$  Hz, 1.34F), -115.8 (dt,  $J = 279.9, 5.6$  Hz, 0.33F), -115.9 (dq,  $J = 275.2, 5.7$  Hz, 0.67F), -123.1 (ddt,  $J = 280.0, 17.4, 3.8$  Hz, 0.33F), -123.5 (ddt,  $J = 279.2, 18.0, 4.4$  Hz, 0.67F);  $^{13}\text{C NMR}$  (101 MHz,  $\text{CDCl}_3$ )  $\delta$  ppm 172.5, 172.2, 151.3, 141.0, 140.9, 136.7, 136.6, 132.2, 131.8, 129.5, 129.4, 129.3, 128.7 (t,  $J = 5.0$  Hz), 128.5, 128.4, 128.3, 128.2, 127.5, 127.4, 120.6, 120.5, 120.4 (q,  $J = 259.4$  Hz), 120.3 (q,  $J = 259.4$  Hz), 117.5 (tt,  $J = 255.1, 33.4$  Hz), 116.0 (dt,  $J = 259.3, 36.0$  Hz), 113.4 (dt,  $J = 253.3, 35.4$  Hz), 71.6 (dd,  $J = 31.6, 22.2$  Hz), 71.3 (dd,  $J = 32.0, 22.0$  Hz), 45.2, 45.1, 45.0, 44.9, 30.3, 22.4, 22.3, 17.9, 17.8; **MS** (ESI):  $m/z$  579.2  $[\text{M}+\text{Na}]^+$ ; **HRMS** (ESI-TOF):  $m/z$  Calculated for  $\text{C}_{29}\text{H}_{27}\text{F}_7\text{NaO}_3$   $[\text{M}+\text{Na}]^+$ : 579.1741; Found: 579.1735.

**2,2,3,3-tetrafluoro-1-phenyl-3-(4-(trifluoromethoxy)phenyl)propyl**  
**3-(4,5-diphenyloxazol-2-yl)propanoate (11)**

**3-(4,5-**

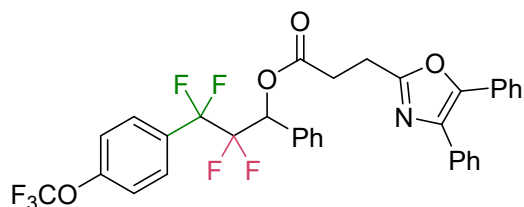

The product mixture was purified by silica gel column chromatography (hexane/EA = 8:1) to afford **11** (185.2 mg, 72%) as a colorless liquid;  $^1\text{H NMR}$  (400 MHz,  $\text{CDCl}_3$ )  $\delta$  7.47 (d,  $J = 6.8$  Hz, 2H), 7.41–7.39 (m, 4H), 7.31 (d,  $J = 7.0$  Hz, 2H), 7.23–7.12 (m, 4H), 7.07 (d,  $J = 8.3$  Hz, 2H), 6.28 (dd,  $J = 17.5, 7.0$  Hz, 1H), 3.07 – 2.93 (m, 2H),

2.83 (t,  $J = 7.2$  Hz, 2H);  $^{19}\text{F}$  NMR (377 MHz,  $\text{CDCl}_3$ )  $\delta$  ppm -57.7 (s, 3F), -109.7 (ddt,  $J = 394.0, 268.5, 5.1$  Hz, 2F), -115.8 (dq,  $J = 280.3, 5.7$  Hz, 1F), -122.8 (ddt,  $J = 280.3, 17.1, 5.3$  Hz, 1F);  $^{13}\text{C}$  NMR (101 MHz,  $\text{CDCl}_3$ )  $\delta$  ppm 169.9, 161.3, 151.3, 145.6, 135.2, 132.5, 132.0, 129.6, 129.2 (t,  $J = 25.3$  Hz), 129.0, 128.8, 128.8, 128.7, 128.7, 128.6, 128.5, 128.1, 128.0, 126.6, 120.6, 120.4 (q,  $J = 258.6$  Hz), 117.7 (tt,  $J = 254.5, 34.3$  Hz), 113.4 (tt,  $J = 253.5, 36.4$  Hz), 71.4 (dd,  $J = 31.5, 21.7$  Hz), 30.8, 23.2; **MS** (ESI):  $m/z$  666.1  $[\text{M}+\text{Na}]^+$ ; **HRMS** (ESI-TOF):  $m/z$  Calculated for  $\text{C}_{34}\text{H}_{24}\text{F}_7\text{NNaO}_4$   $[\text{M}+\text{Na}]^+$ : 666.1486; Found: 666.1480.

## 6. Mechanistic experiments.

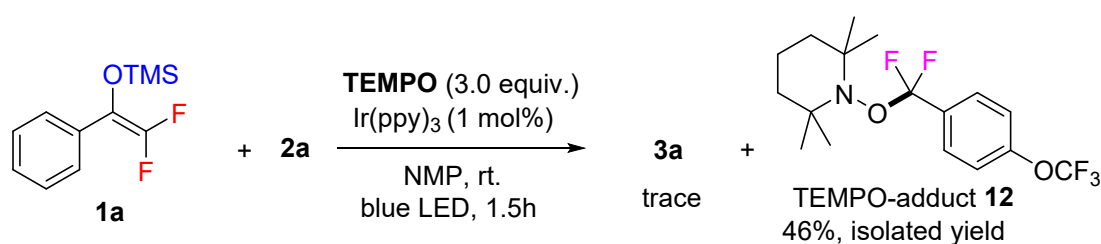

A 25 mL of Schlenk tube equipped with a rubber septum and magnetic stirring bar, *fac*- $\text{Ir}(\text{ppy})_3$  (2.6 mg, 0.004 mmol, 1 mol %) and difluoroalkyl sulfone **2a** (0.4 mmol, 1.0 equiv), and TEMPO (187.2 mg, 1.2 mmol, 3.0 equiv) were dissolved in dry NMP (2.0 mL), then difluoroenol silyl ethers **1a** (0.8 mmol, 2.0 equiv) was added. The mixture was degassed three times by the freeze-pump-thaw procedure. The flask was placed at a distance of 2 cm from the blue LEDs. After 1.5 hours, the reaction was quenched by water, extracted by  $\text{Et}_2\text{O}$ . The organic phase was dried by anhydrous sodium sulfate, then the solvent was removed under reduced pressure and the residue was purified by flash chromatography on silica gel to afford the TEMPO-adduct **12** in 46% yield.





## 7. References

1. Prakash, S. G. K.; Hu, J.; Olah, G. A. Facile Preparation of Di- and Monofluoromethyl Ketones from Trifluoromethyl Ketones via Fluorinated Enol Silyl Ethers. *J. Fluorine Chem.* **2001**, *112*, 355 – 360.
1. He, Z.; Tan, P.; Ni, C.; Hu, J. Fluoroalkylative Aryl Migration of Conjugated *N*-Arylsulfonylated Amides Using Easily Accessible Sodium Di- and Monofluoroalkanesulfinate. *Org. Lett.* **2015**, *17*, 1838 – 1841.
3. Nambo, M.; Yim J. C. H.; Freitas L. B. O.; Tahara, Y.; Ariki Z. T.; Yuuki, M.; Yokogawa, D.; Crudden C. M. Modular Synthesis of  $\alpha$ -Fluorinated Arylmethanes via Desulfonylative Cross-Coupling. *Nat. Commun.* **2019**, *10*, 4528 – 4534.
4. Wei, Z.; Miao, W.; Ni, C.; Hu, J. Iron-Catalyzed Fluoroalkylation of Arylborates with Sulfone Reagents: Beyond the Limitation of Reduction Potential. *Angew. Chem. Int. Ed.* **2021**, *60*, 13597 – 13602.
5. Fu, X.-P.; Xue, X.-S.; Zhang, X.-Y.; Xiao, Y.-L.; Zhang, S.; Guo, Y.-L.; Leng, X.; Houk, K. N.; Zhang, X. Controllable Catalytic Difluorocarbene Transfer Enables Access to Diversified fluoroalkylated arenes. *Nat. Chem.* **2019**, *11*, 948 – 956.

## 8. Copies of $^1\text{H}$ , $^{19}\text{F}$ , and $^{13}\text{C}$ NMR spectra for the products

$^1\text{H}$  NMR (400 MHz,  $\text{CDCl}_3$ )

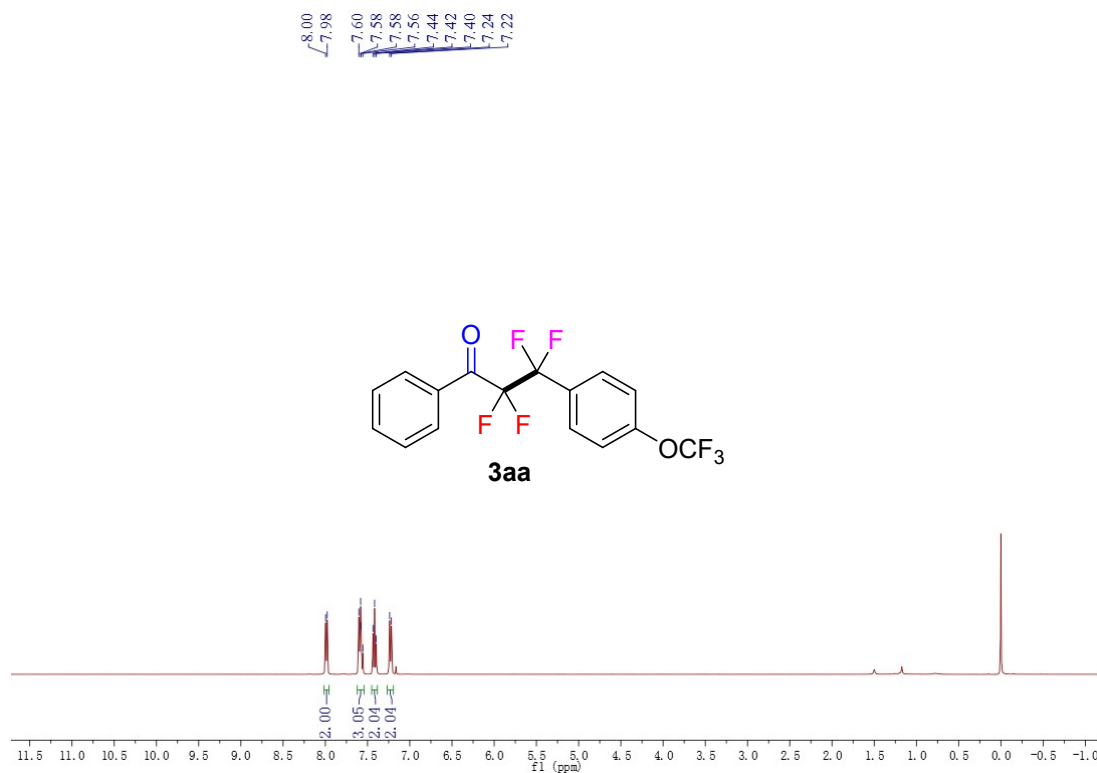

$^{19}\text{F}$  NMR (377 MHz,  $\text{CDCl}_3$ )

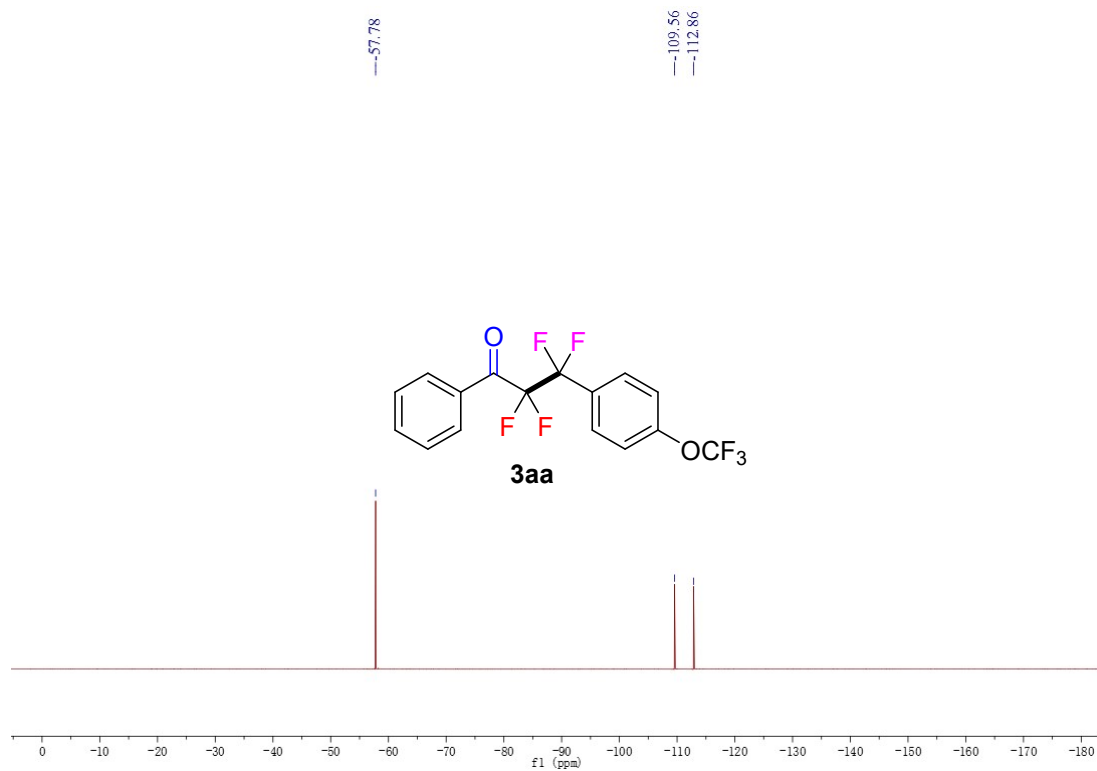

$^{13}\text{C}$  NMR (101 MHz,  $\text{CDCl}_3$ )

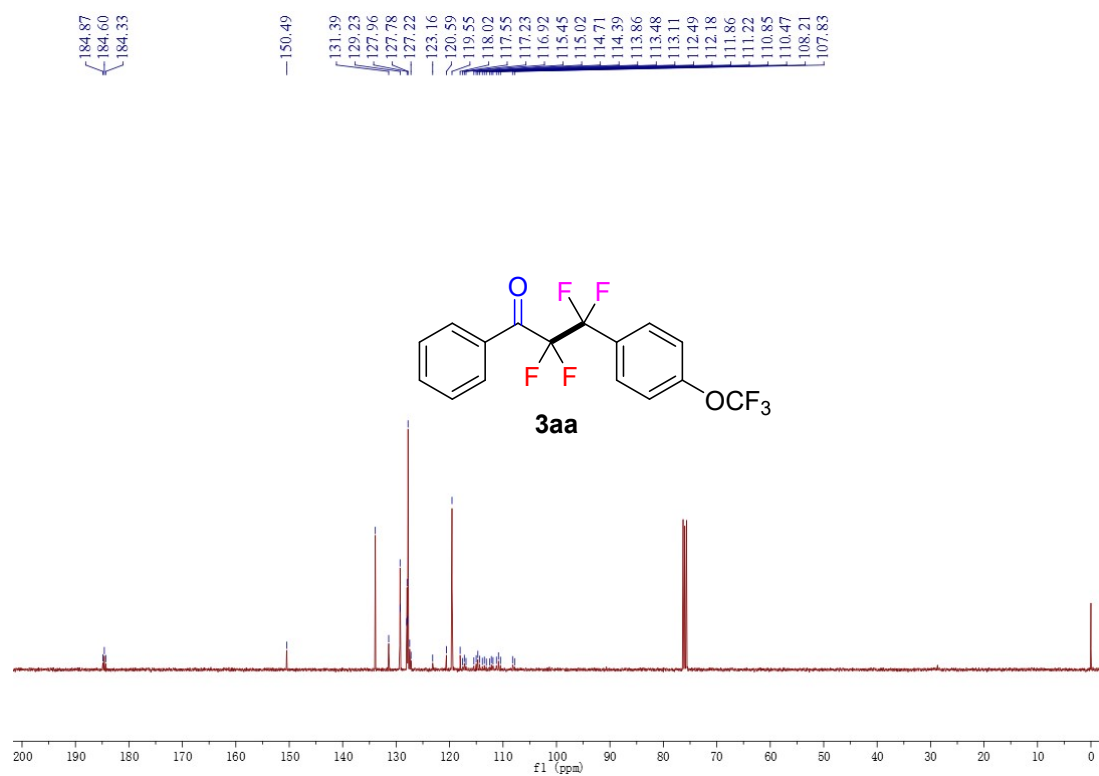

$^1\text{H}$  NMR (400 MHz,  $\text{CDCl}_3$ )

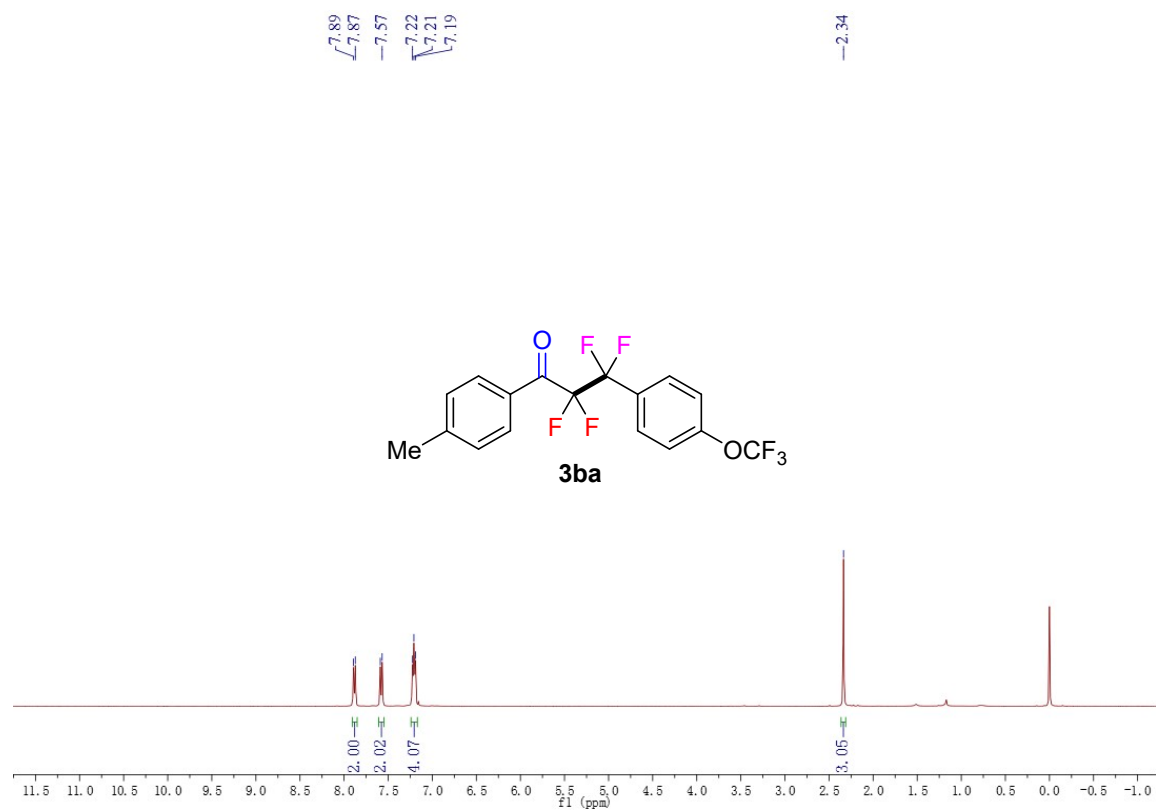

$^{19}\text{F}$  NMR (377 MHz,  $\text{CDCl}_3$ )

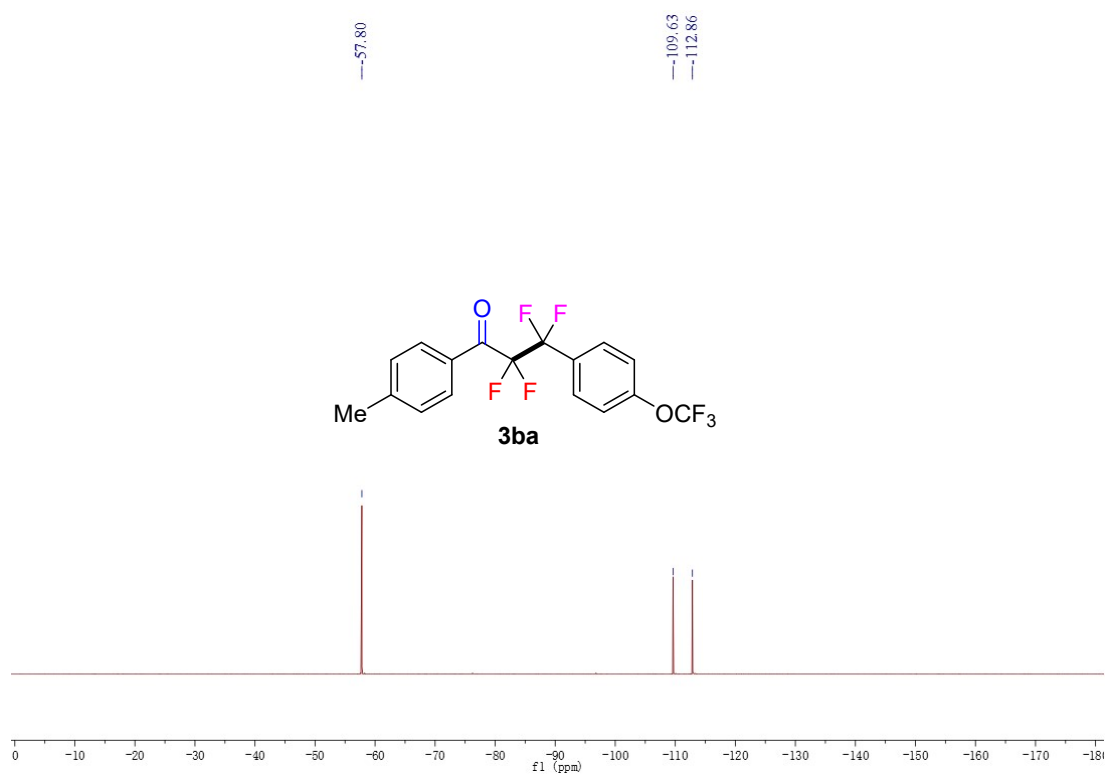

$^{13}\text{C}$  NMR (101 MHz,  $\text{CDCl}_3$ )

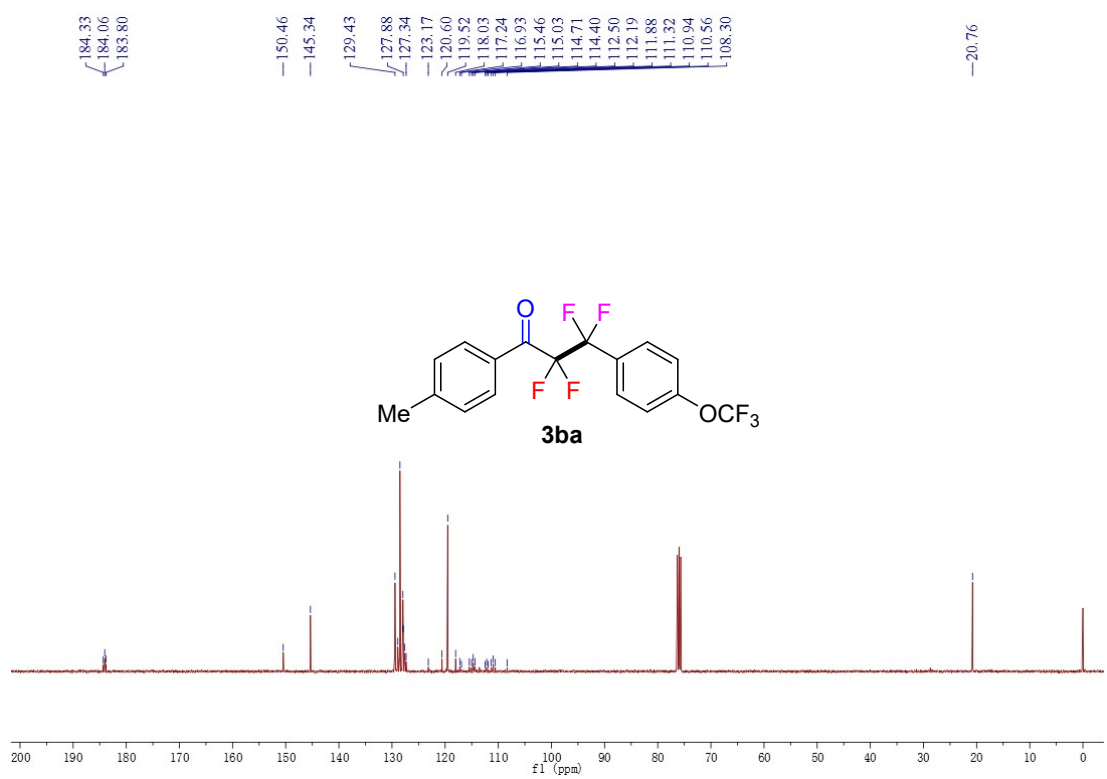

$^1\text{H}$  NMR (400 MHz,  $\text{CDCl}_3$ )

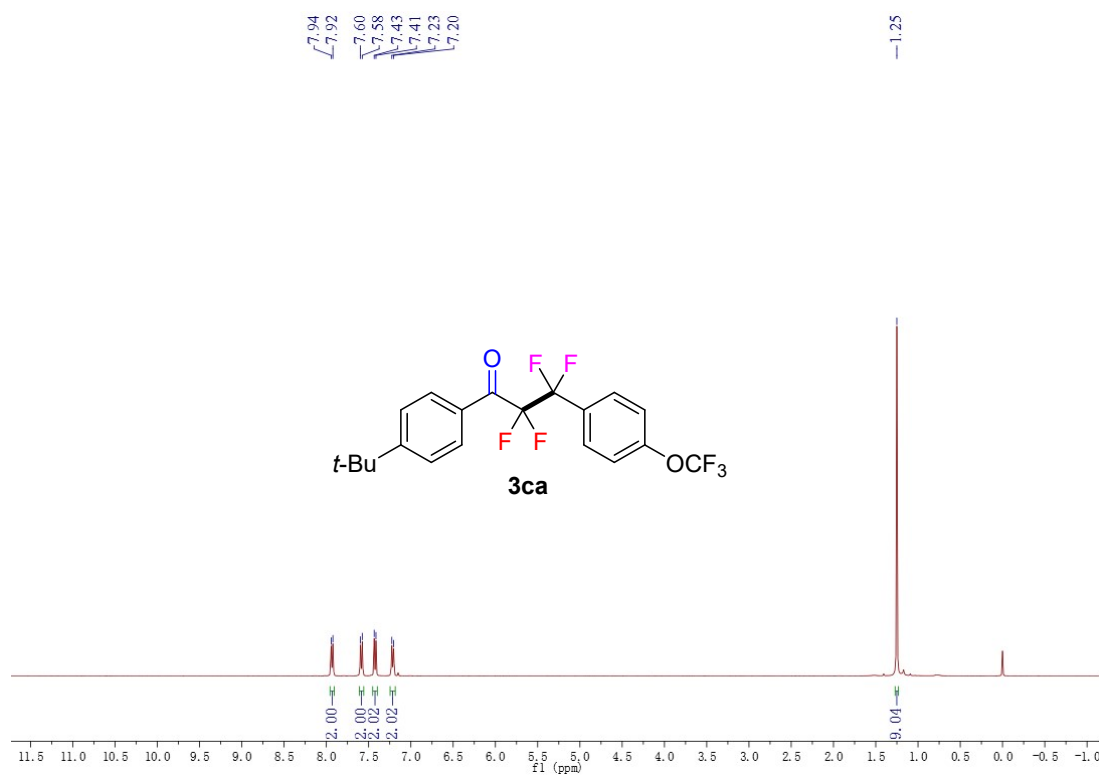

$^{19}\text{F}$  NMR (377 MHz,  $\text{CDCl}_3$ )

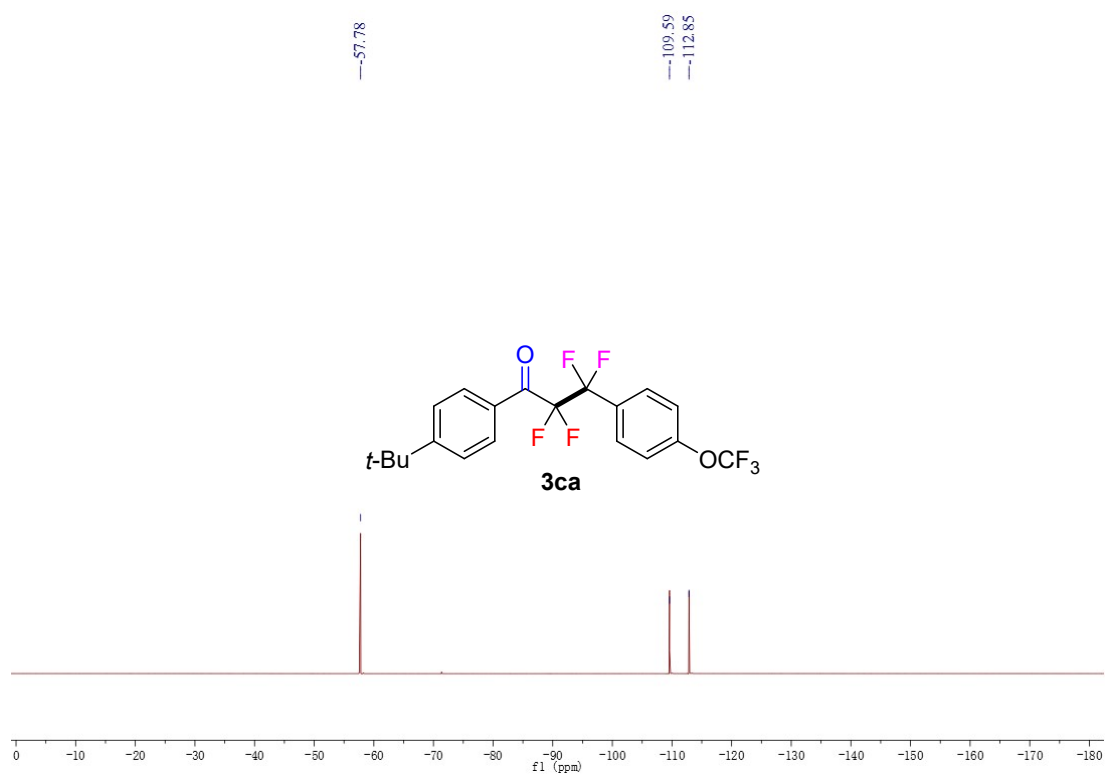

$^{13}\text{C}$  NMR (101 MHz,  $\text{CDCl}_3$ )

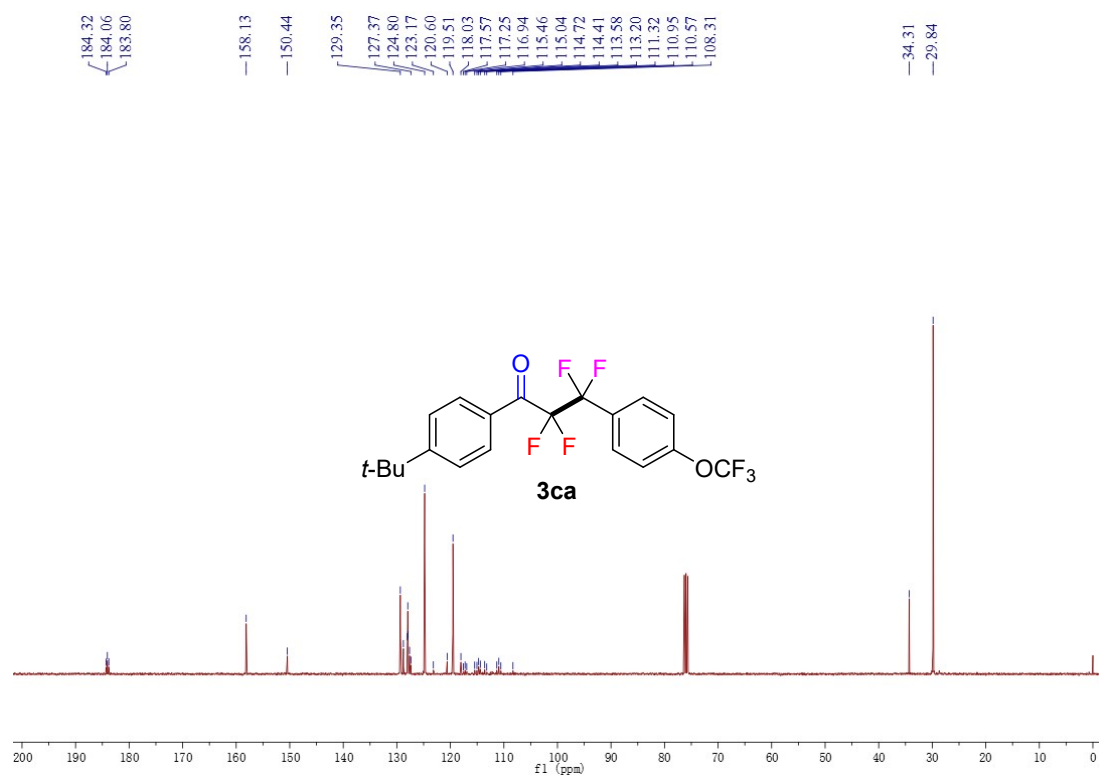

$^1\text{H}$  NMR (400 MHz,  $\text{CDCl}_3$ )

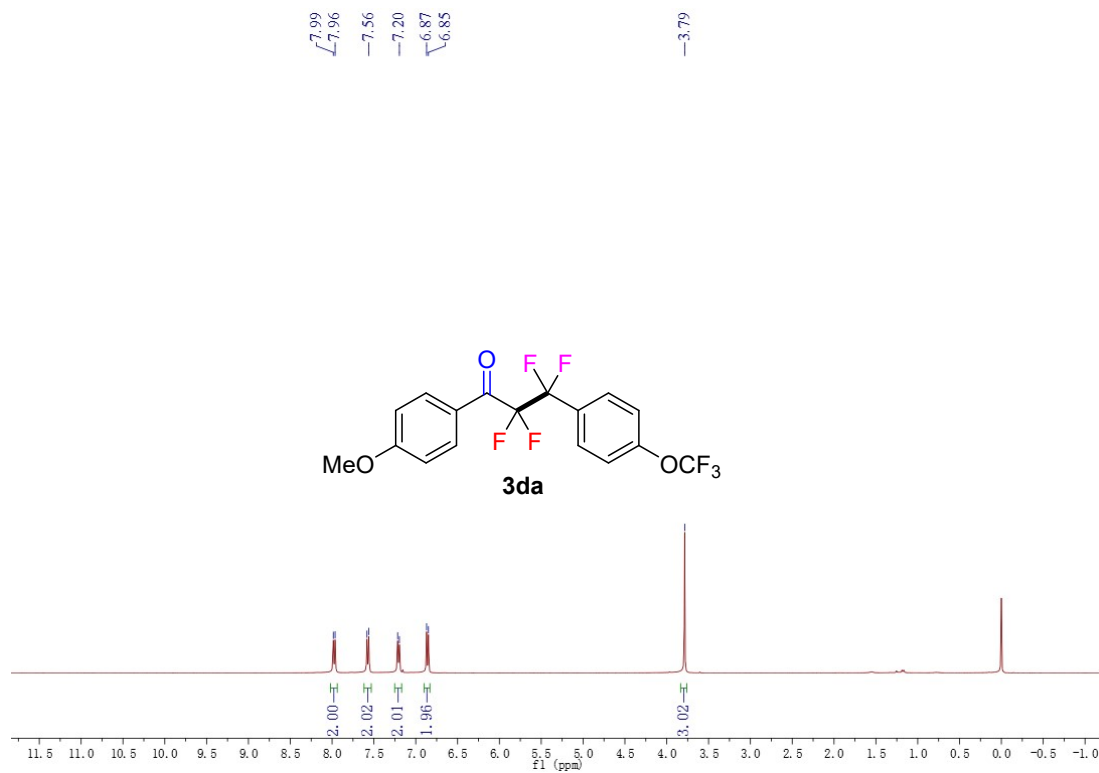

$^{19}\text{F}$  NMR (377 MHz,  $\text{CDCl}_3$ )

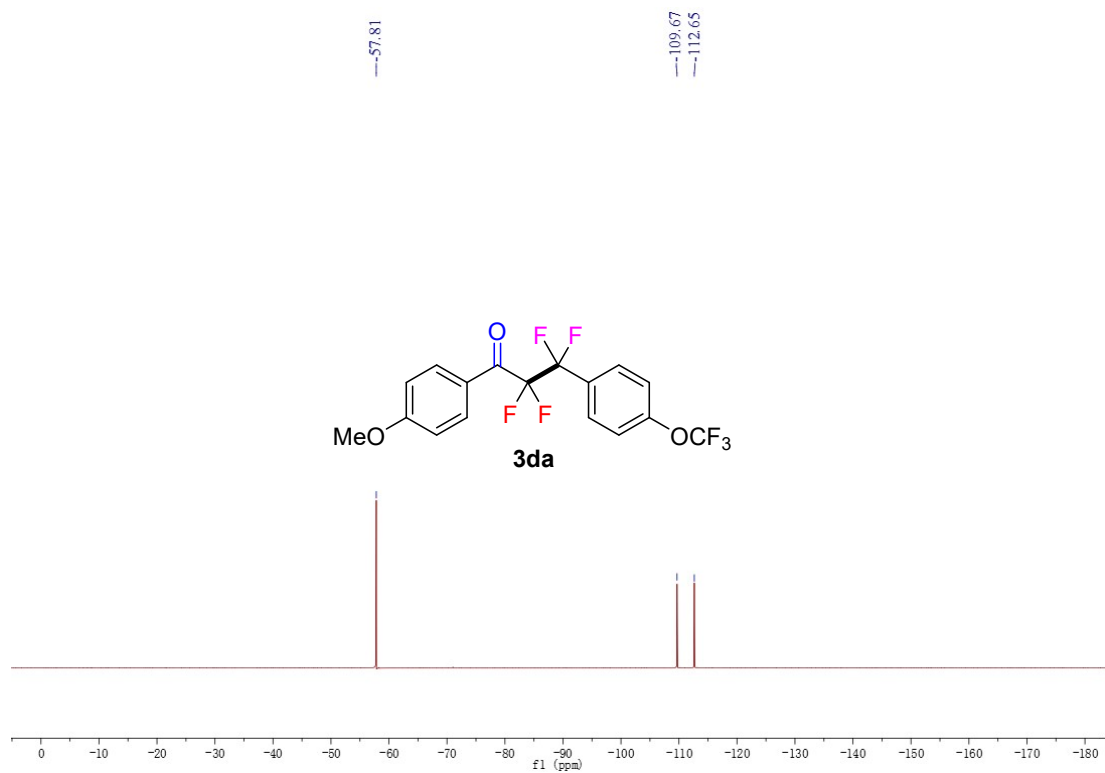

$^{13}\text{C}$  NMR (101 MHz,  $\text{CDCl}_3$ )

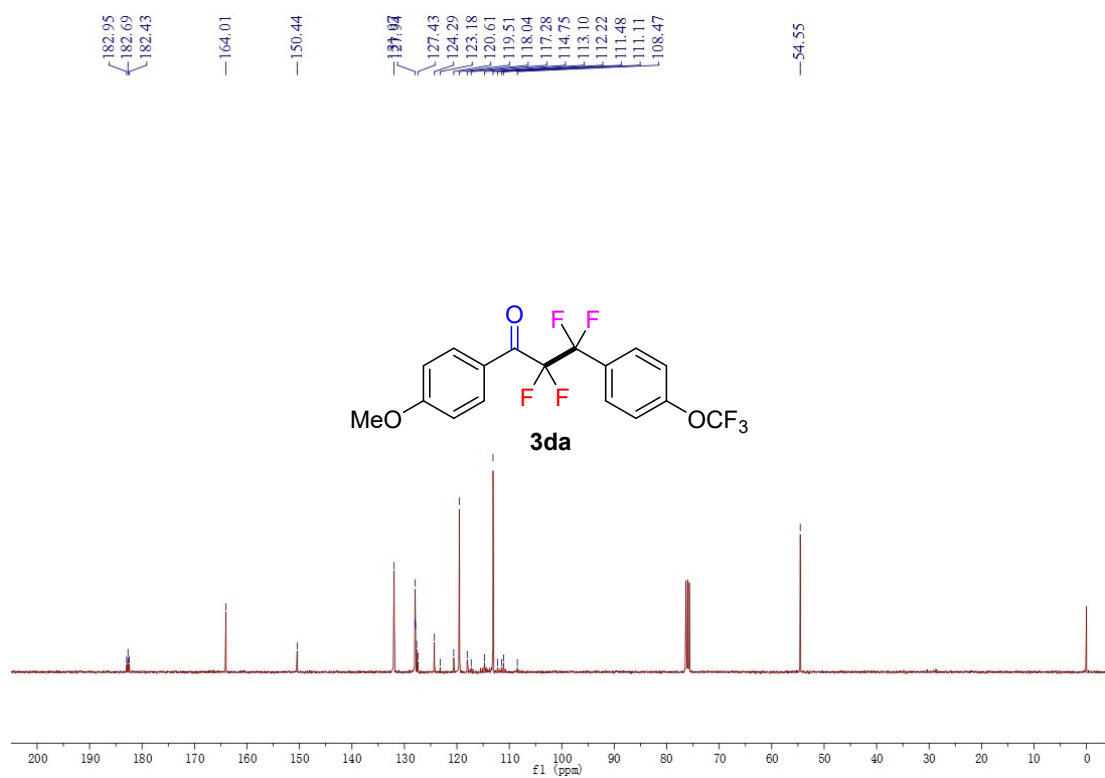

$^1\text{H}$  NMR (400 MHz,  $\text{CDCl}_3$ )



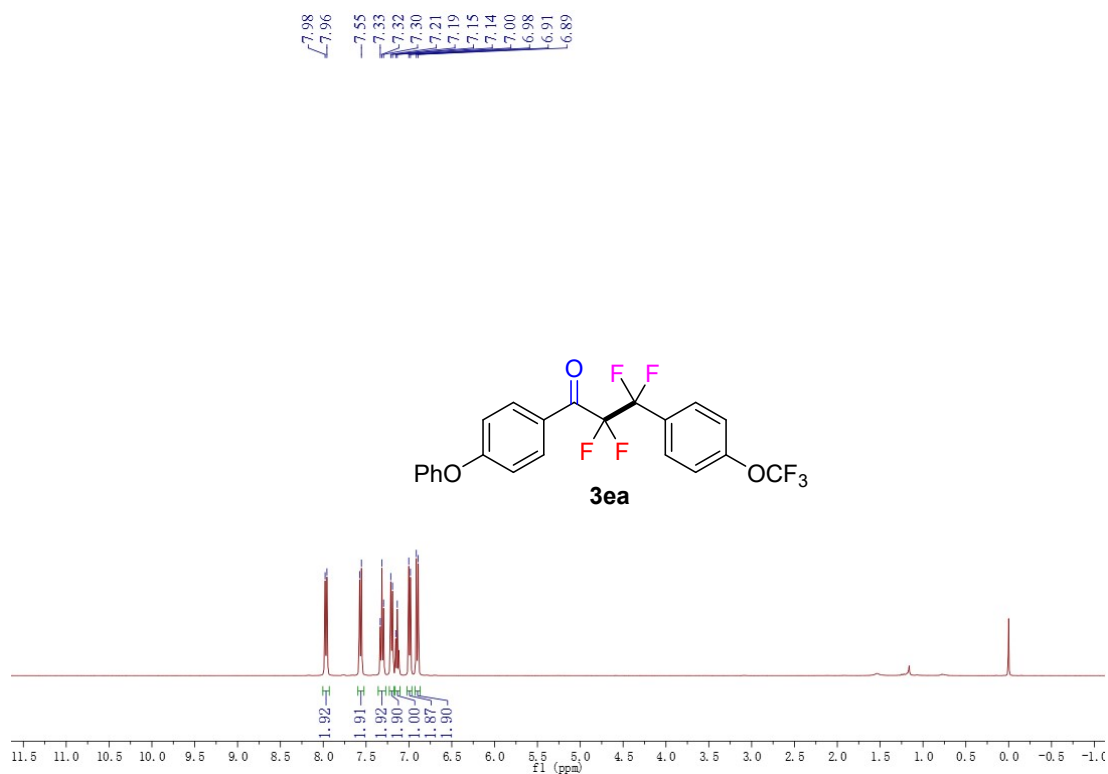

**<sup>19</sup>F NMR (377 MHz, CDCl<sub>3</sub>)**

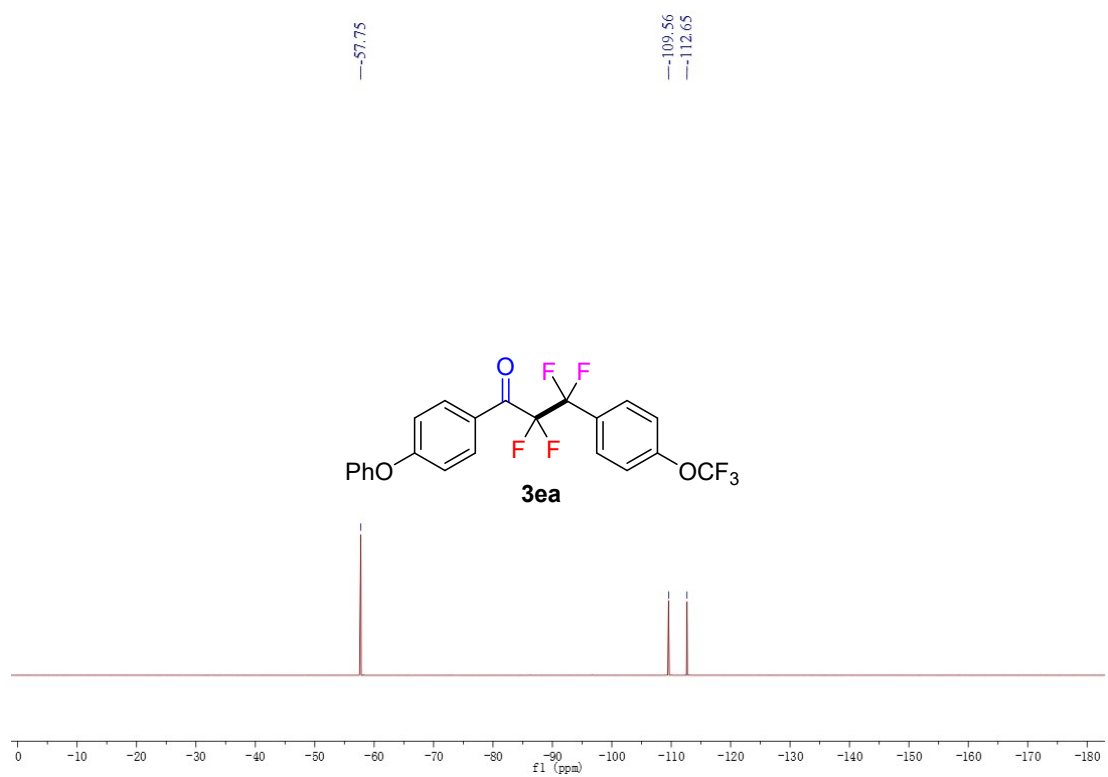

**<sup>13</sup>C NMR (101 MHz, CDCl<sub>3</sub>)**

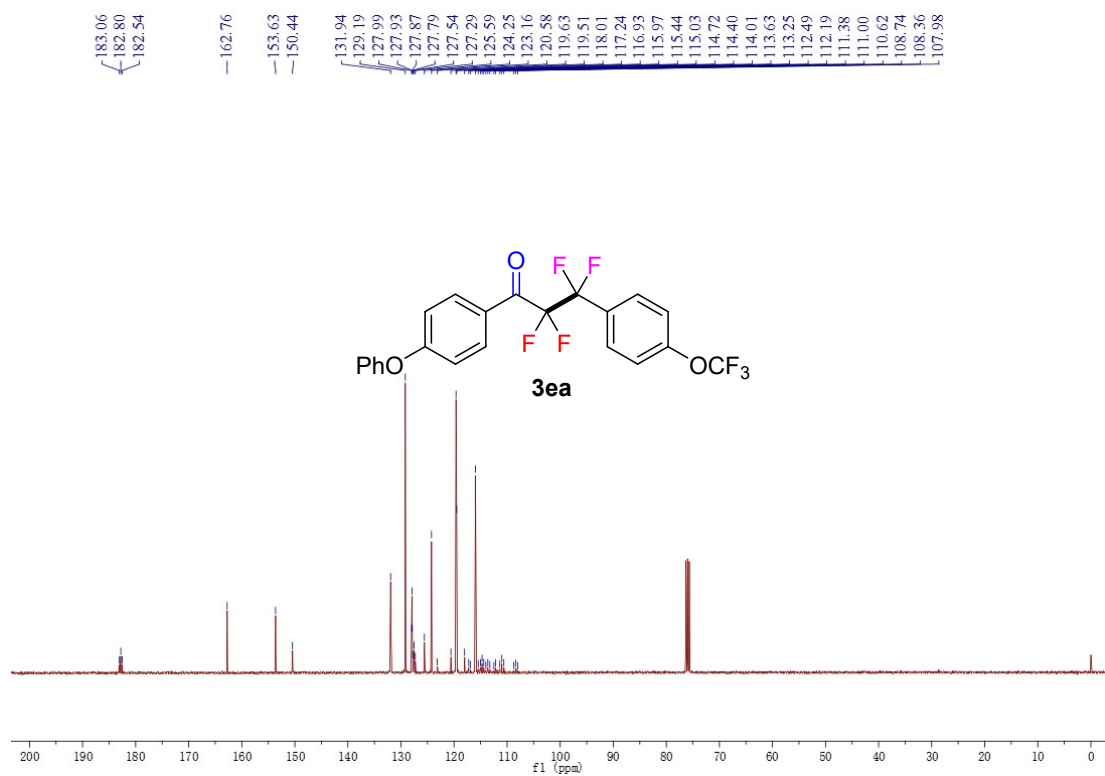

$^{19}\text{F}$  NMR (377 MHz,  $\text{CDCl}_3$ )

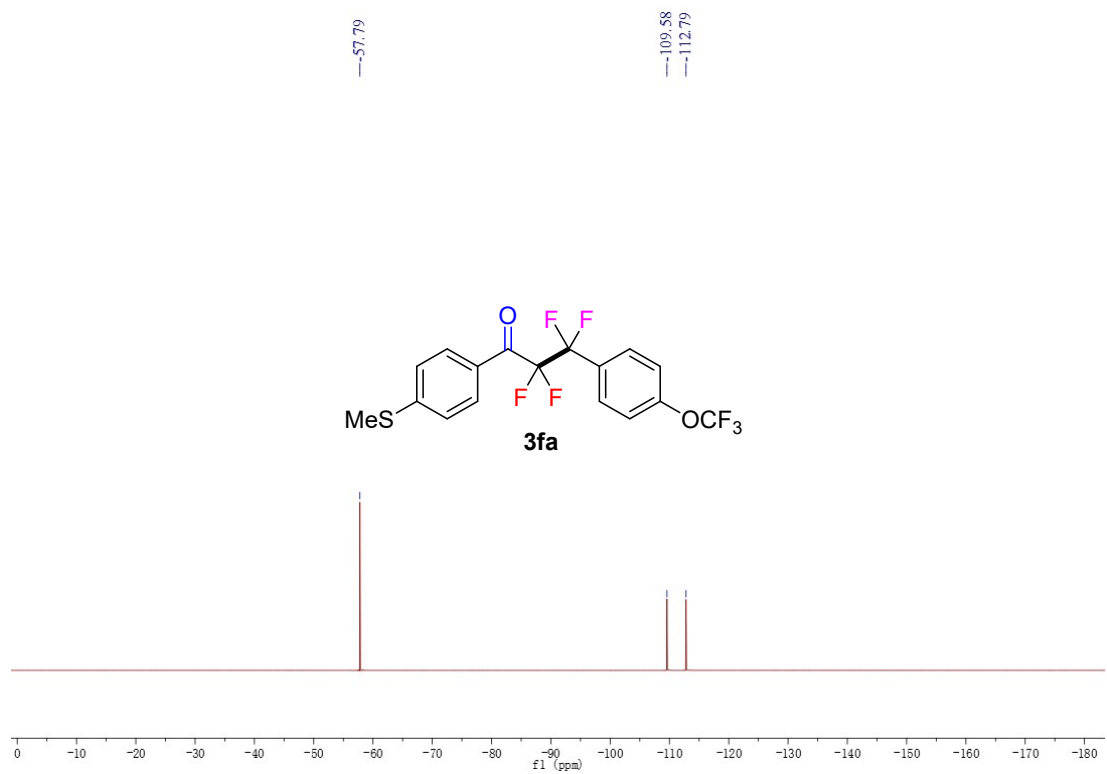

$^1\text{H}$  NMR (400 MHz,  $\text{CDCl}_3$ )

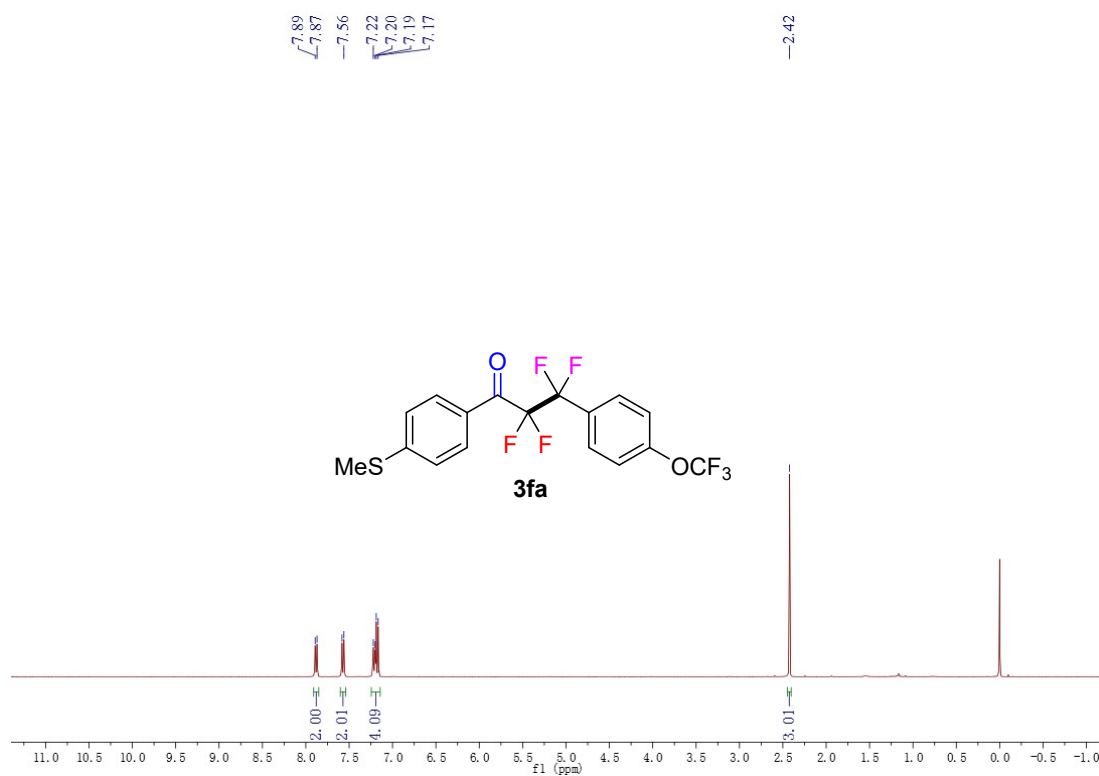

$^{13}\text{C}$  NMR (101 MHz,  $\text{CDCl}_3$ )

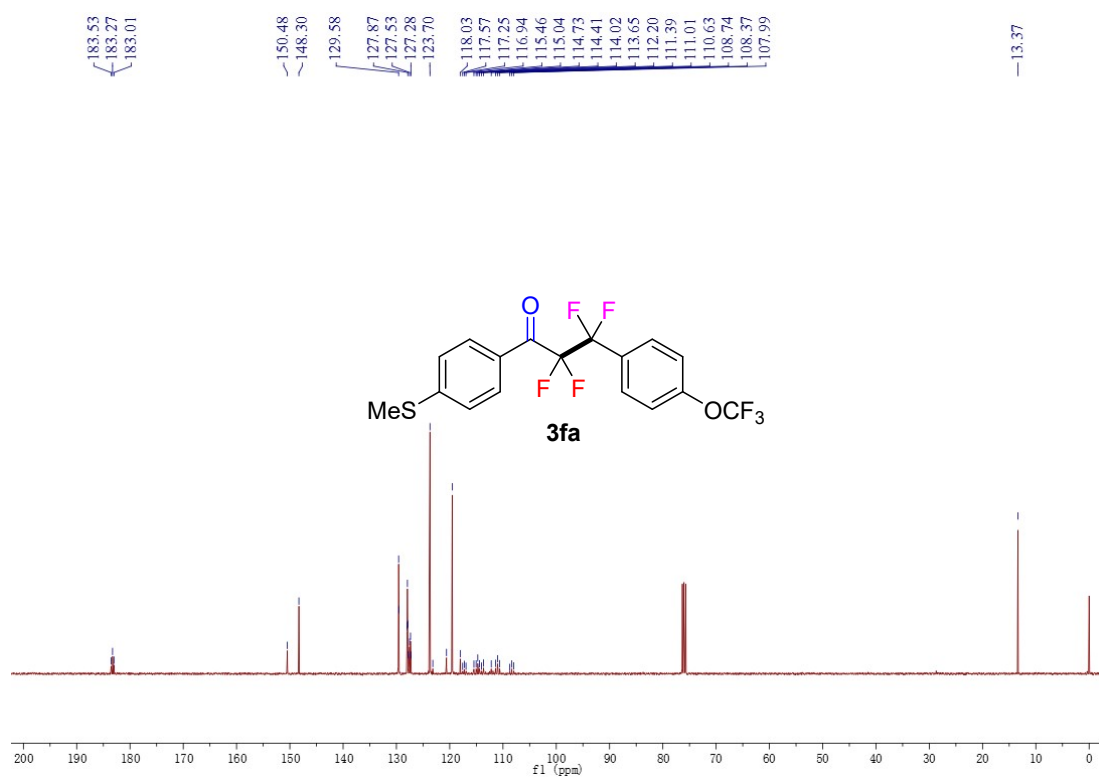

$^{19}\text{F}$  NMR (377 MHz,  $\text{CDCl}_3$ )

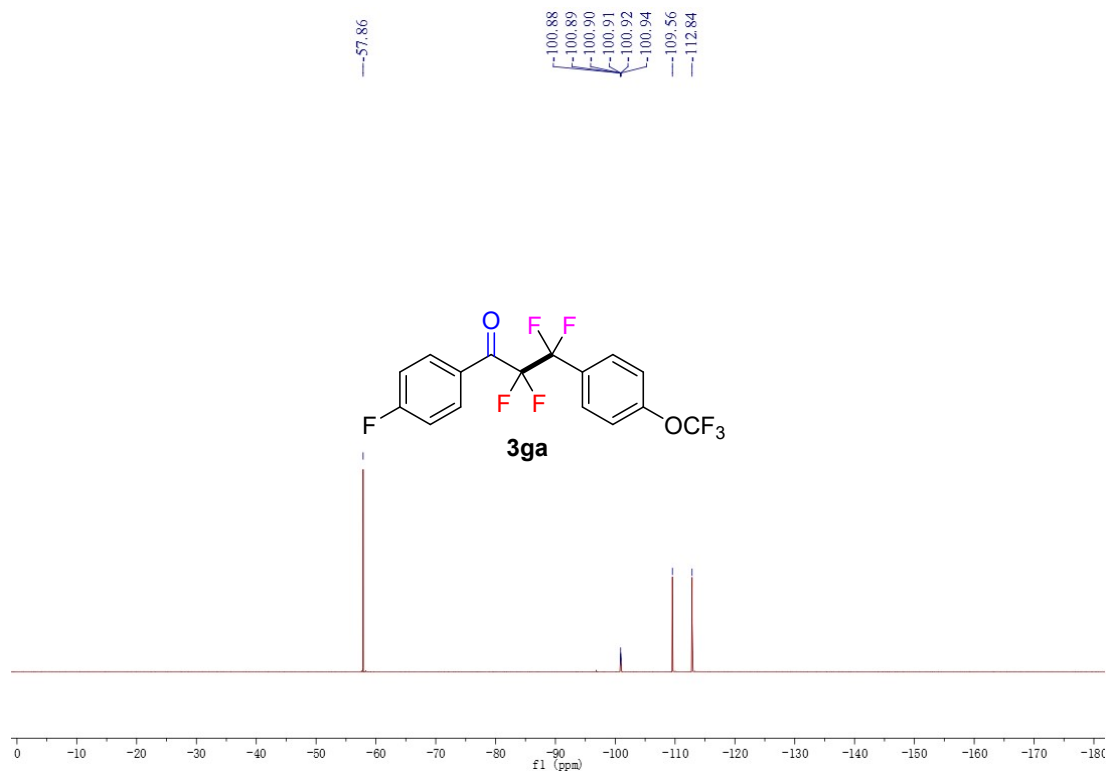

$^1\text{H}$  NMR (400 MHz,  $\text{CDCl}_3$ )

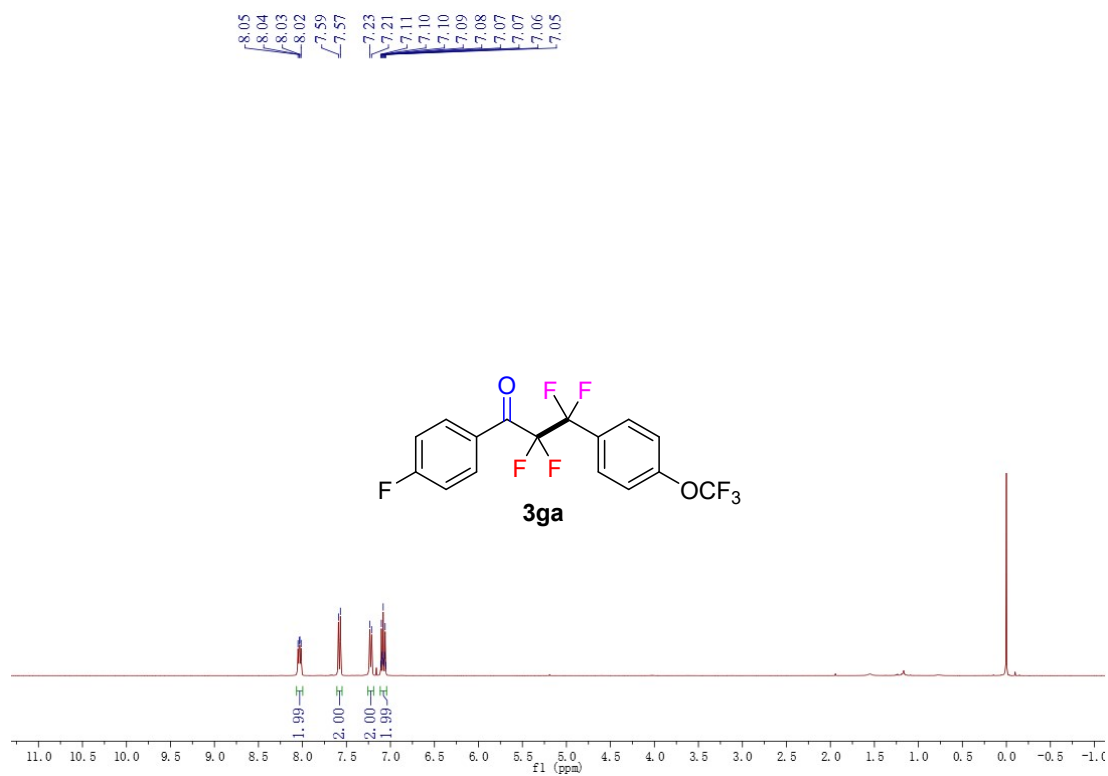

$^{13}\text{C}$  NMR (101 MHz,  $\text{CDCl}_3$ )

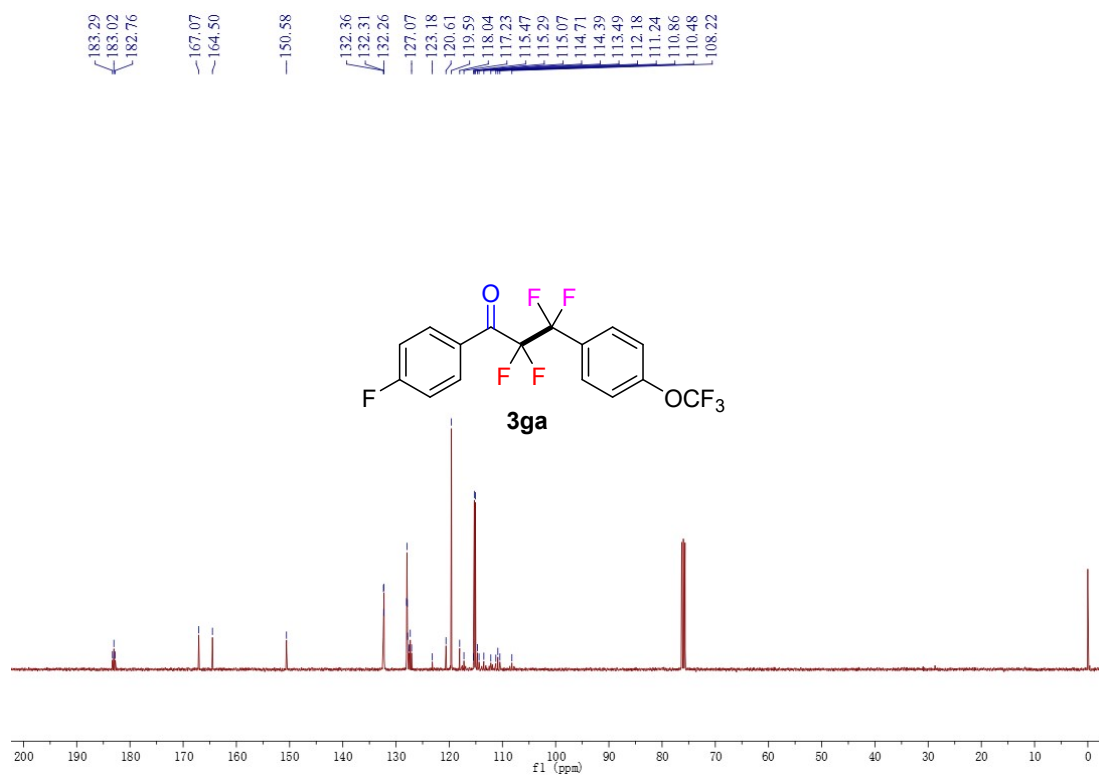

$^1\text{H}$  NMR (400 MHz,  $\text{CDCl}_3$ )

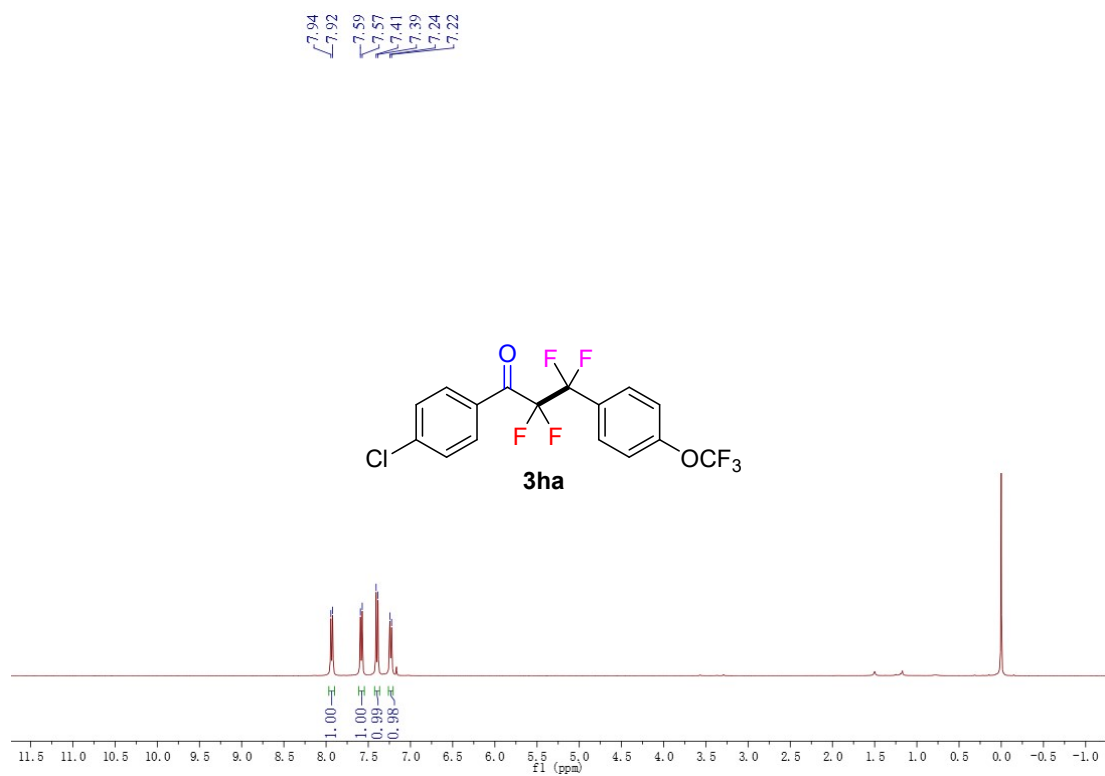

$^{19}\text{F}$  NMR (377 MHz,  $\text{CDCl}_3$ )

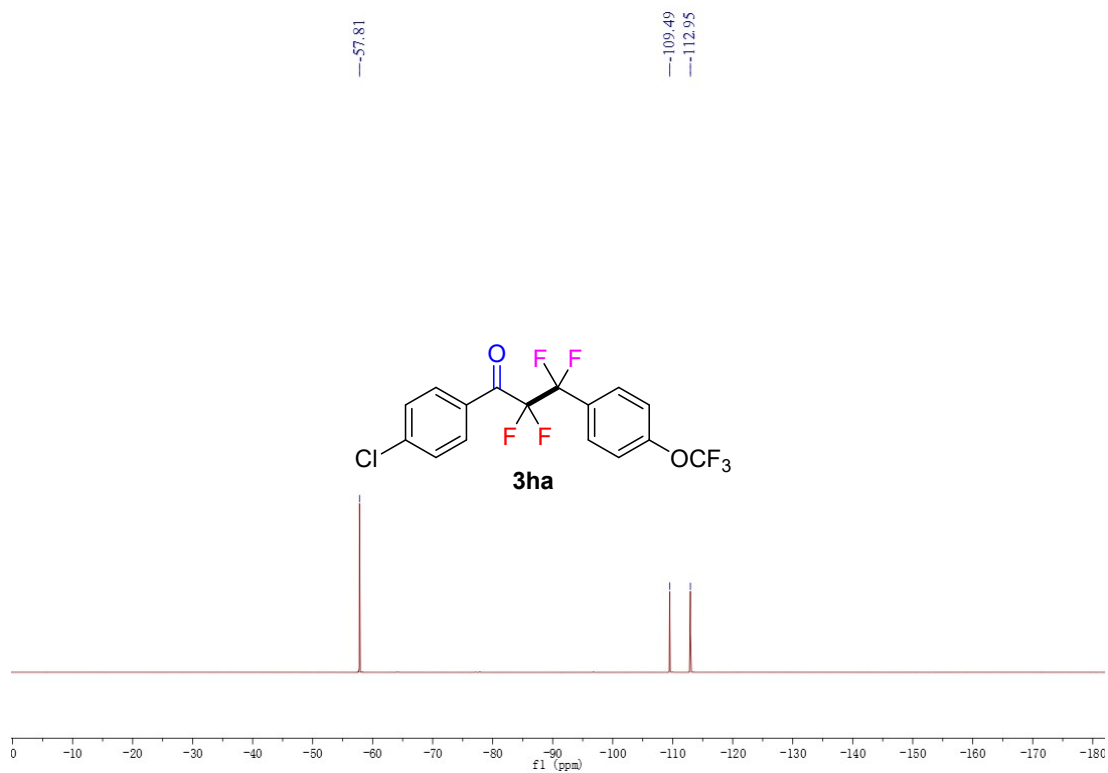

$^{13}\text{C}$  NMR (101 MHz,  $\text{CDCl}_3$ )

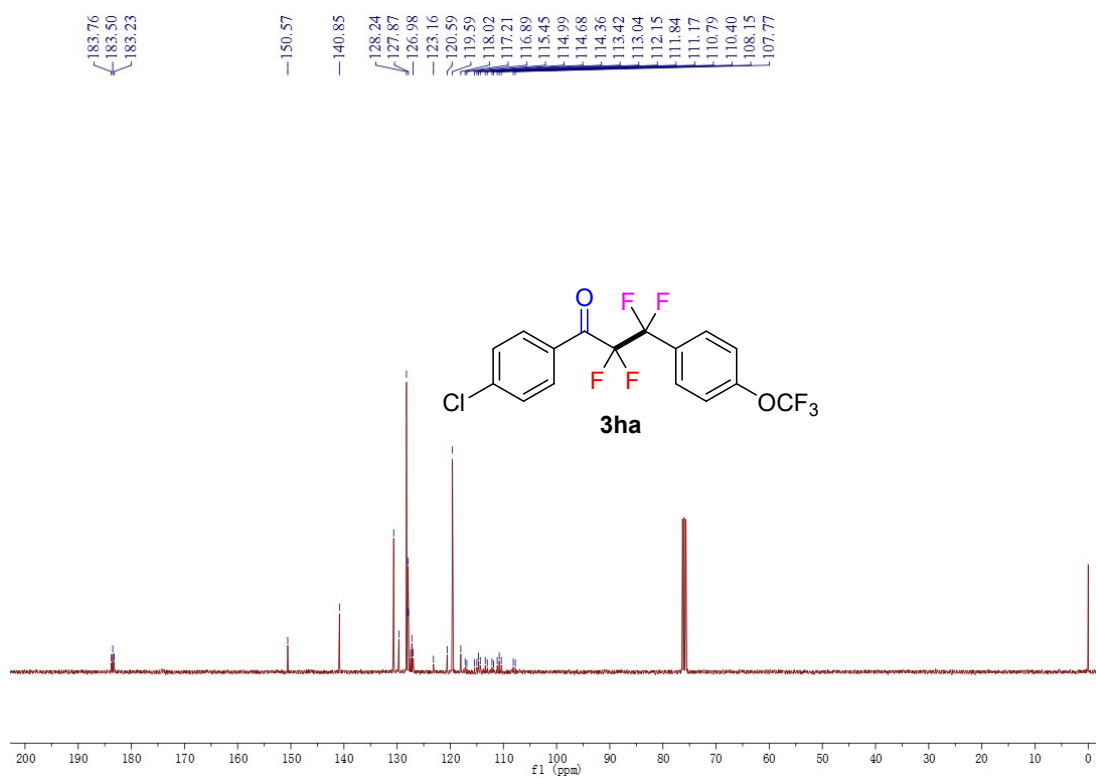

$^1\text{H}$  NMR (400 MHz,  $\text{CDCl}_3$ )

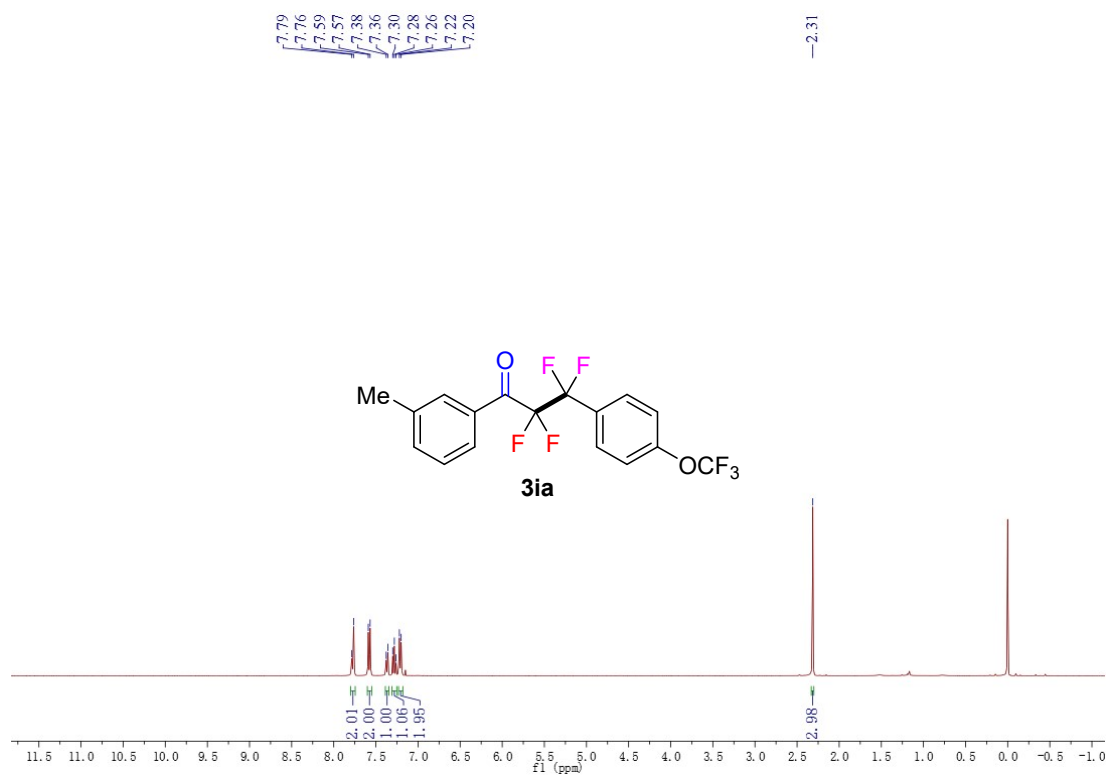

**<sup>19</sup>F NMR (377 MHz, CDCl<sub>3</sub>)**

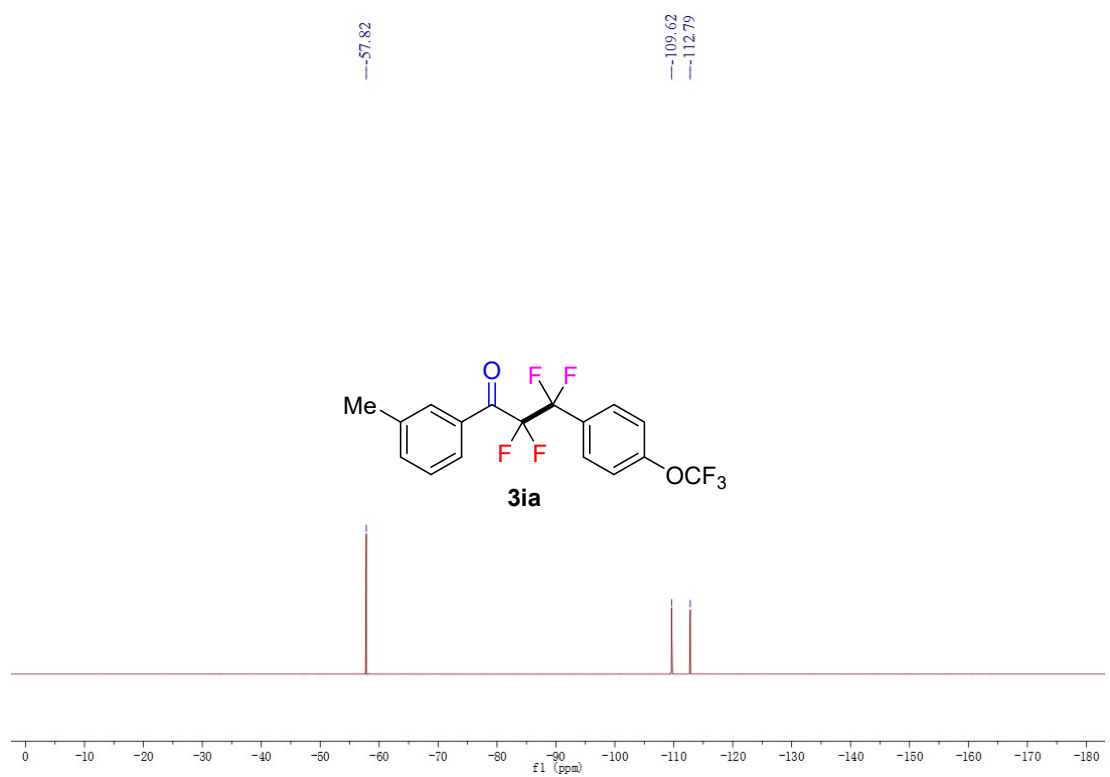

**<sup>13</sup>C NMR (101 MHz, CDCl<sub>3</sub>)**

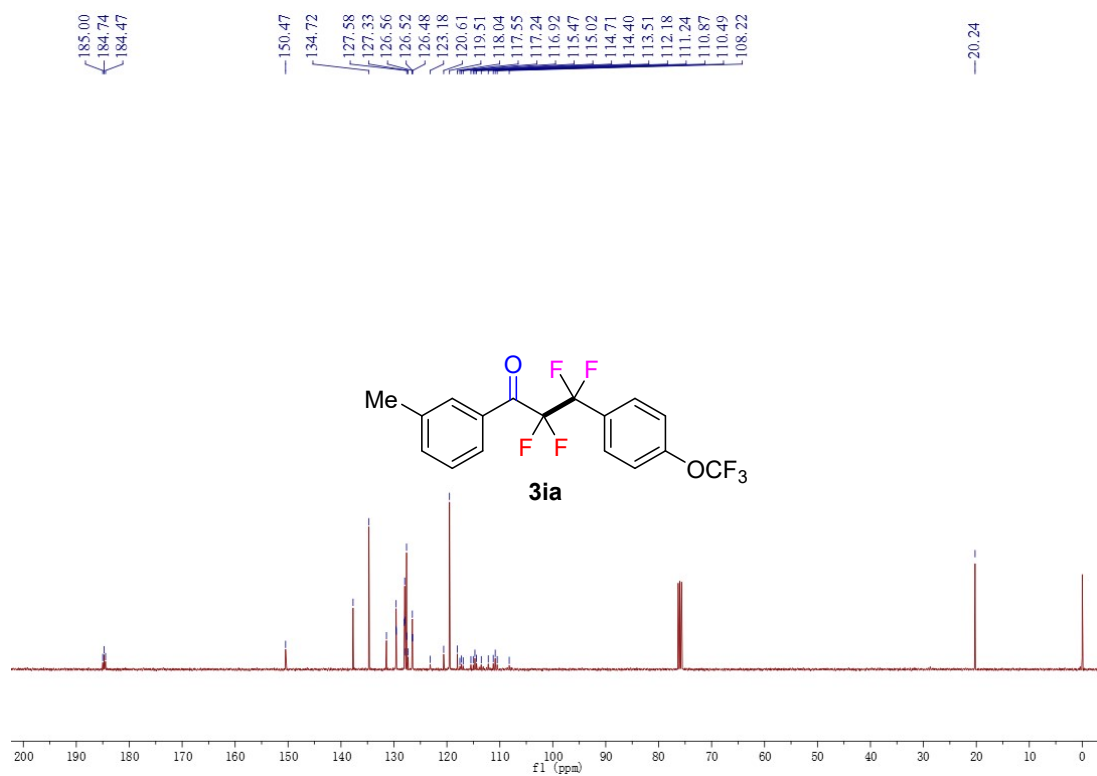

$^1\text{H}$  NMR (400 MHz,  $\text{CDCl}_3$ )

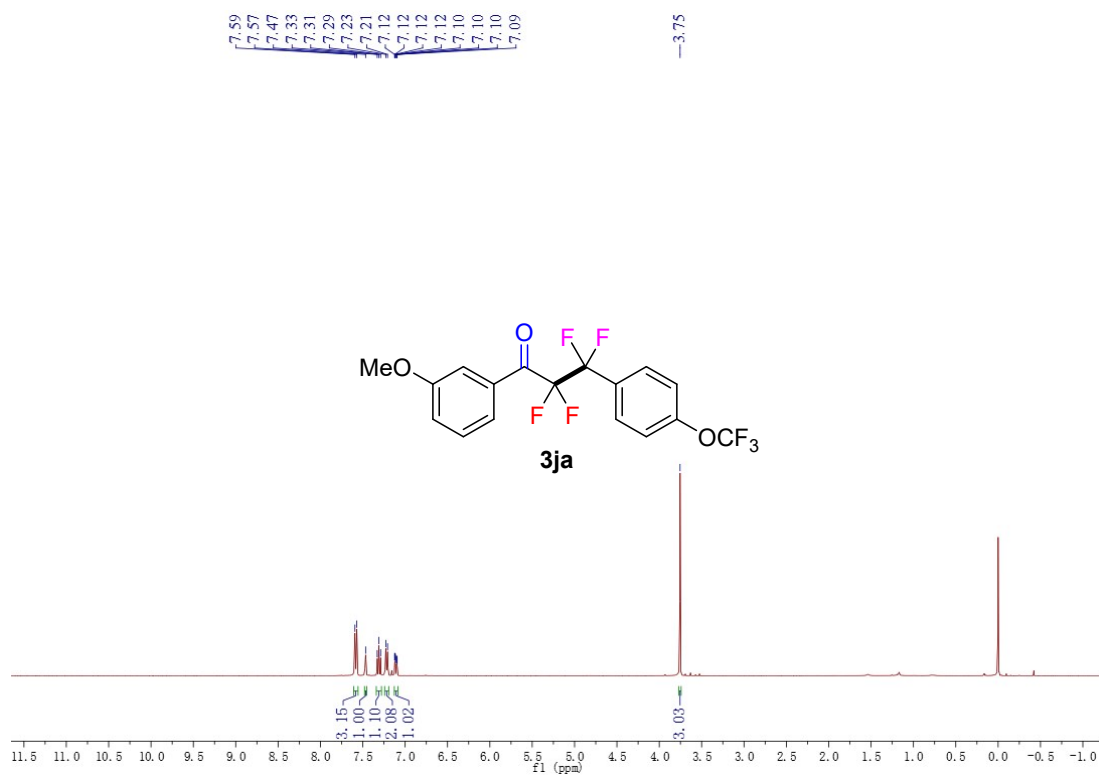

$^{19}\text{F}$  NMR (377 MHz,  $\text{CDCl}_3$ )



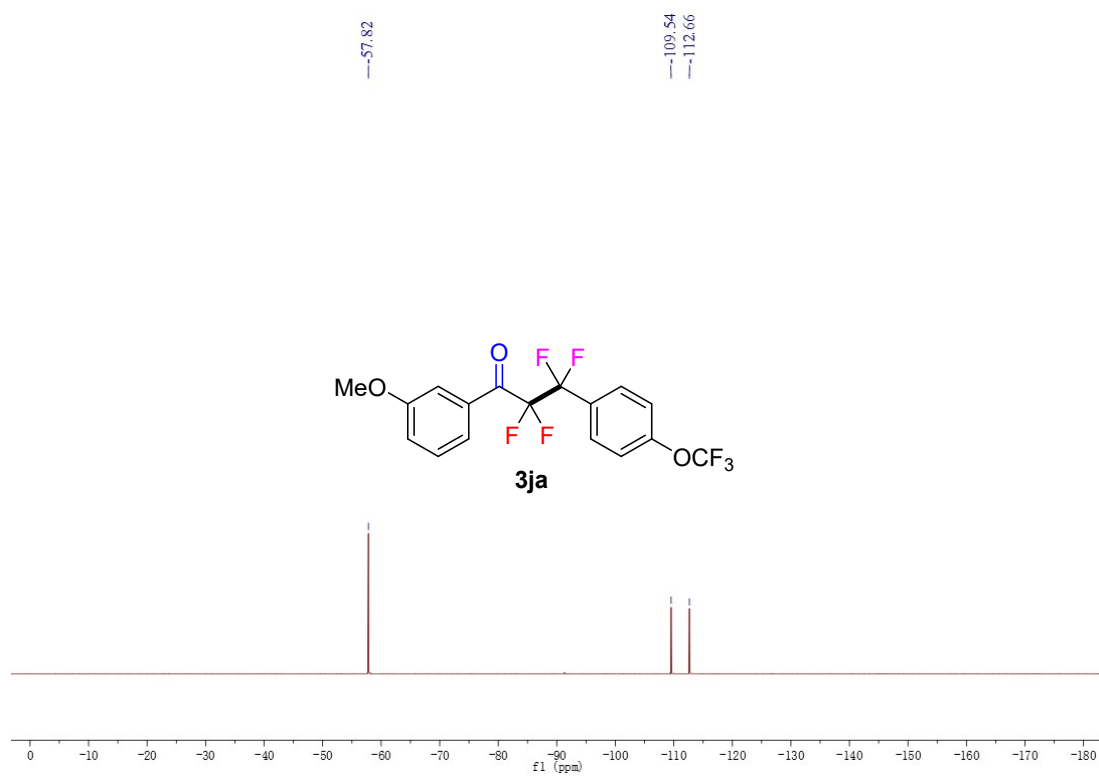

$^{13}\text{C}$  NMR (101 MHz,  $\text{CDCl}_3$ )

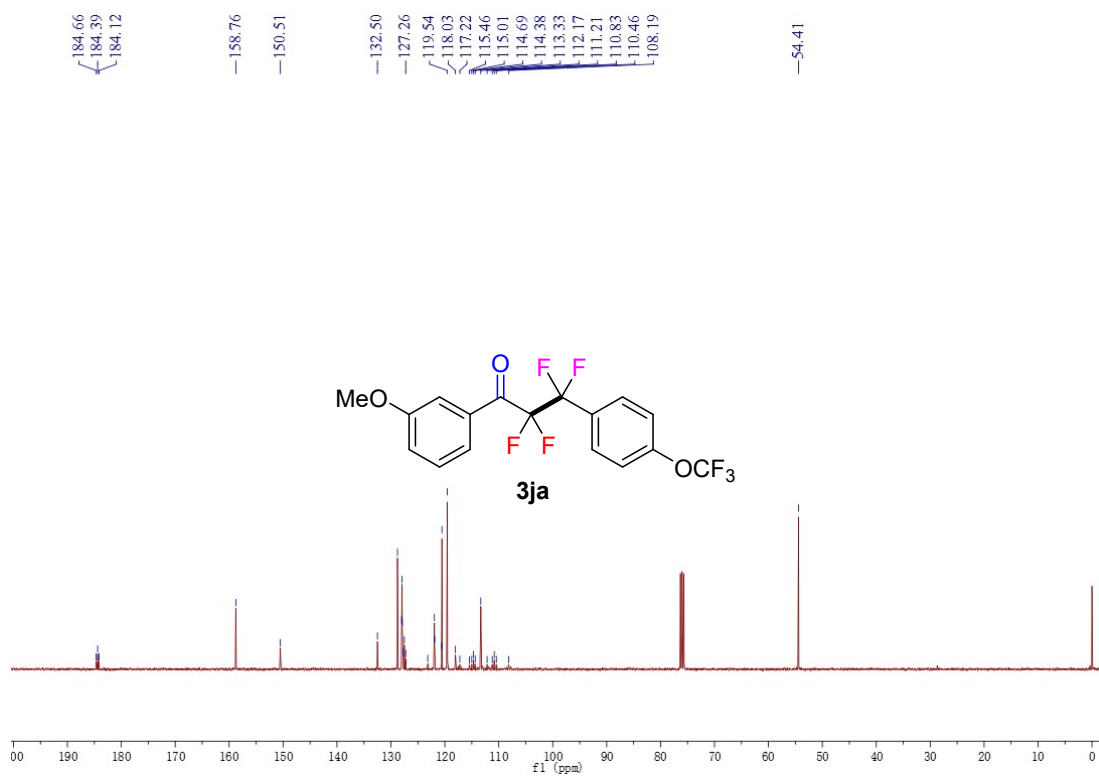

$^{13}\text{C}$  NMR (101 MHz,  $\text{CDCl}_3$ )

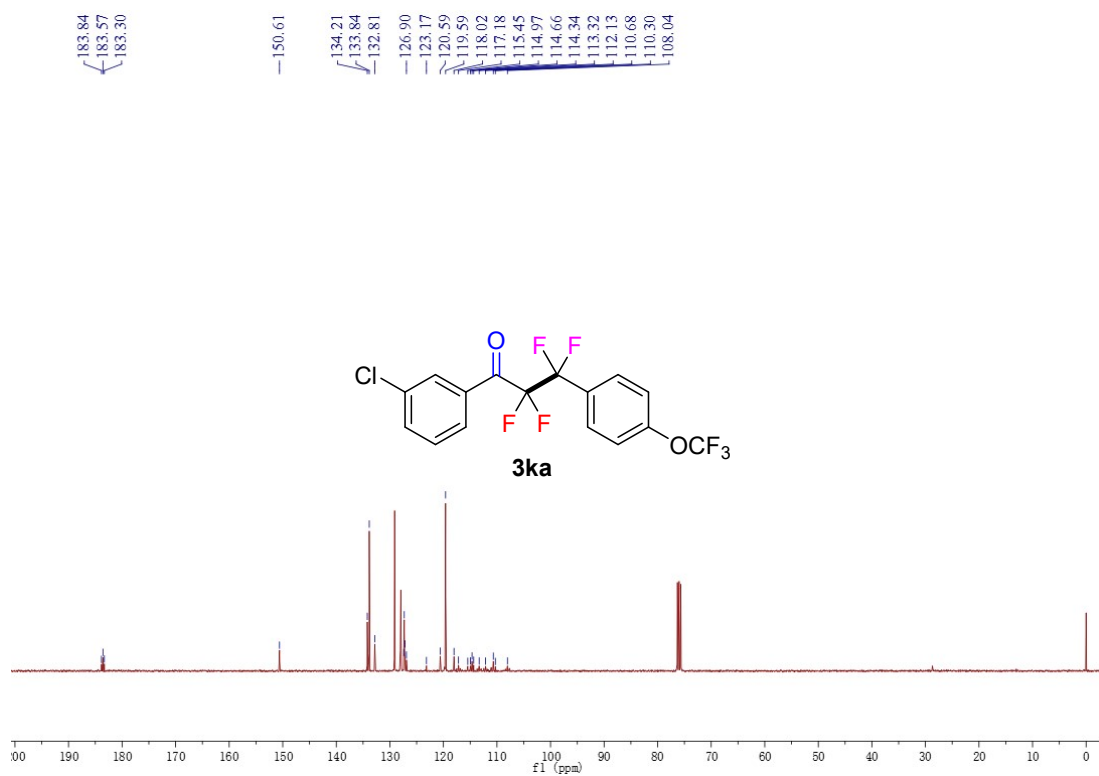

*<sup>19</sup>F NMR (377 MHz, CDCl<sub>3</sub>)*

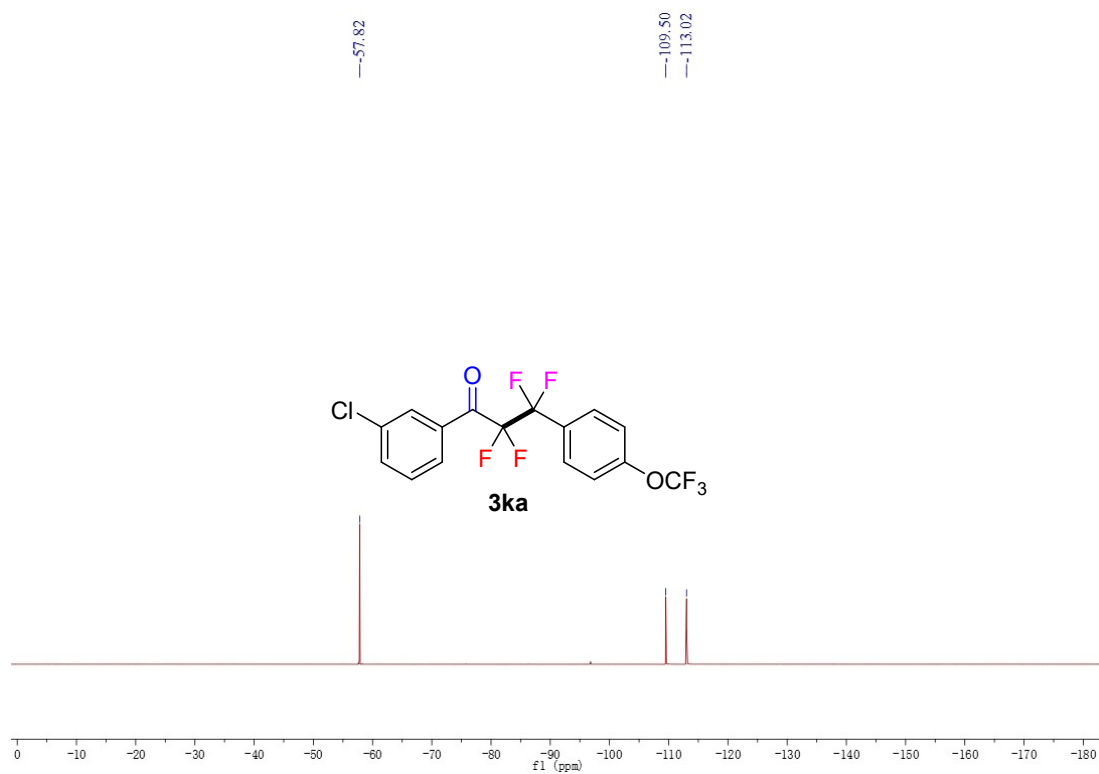

*<sup>1</sup>H NMR (400 MHz, CDCl<sub>3</sub>)*

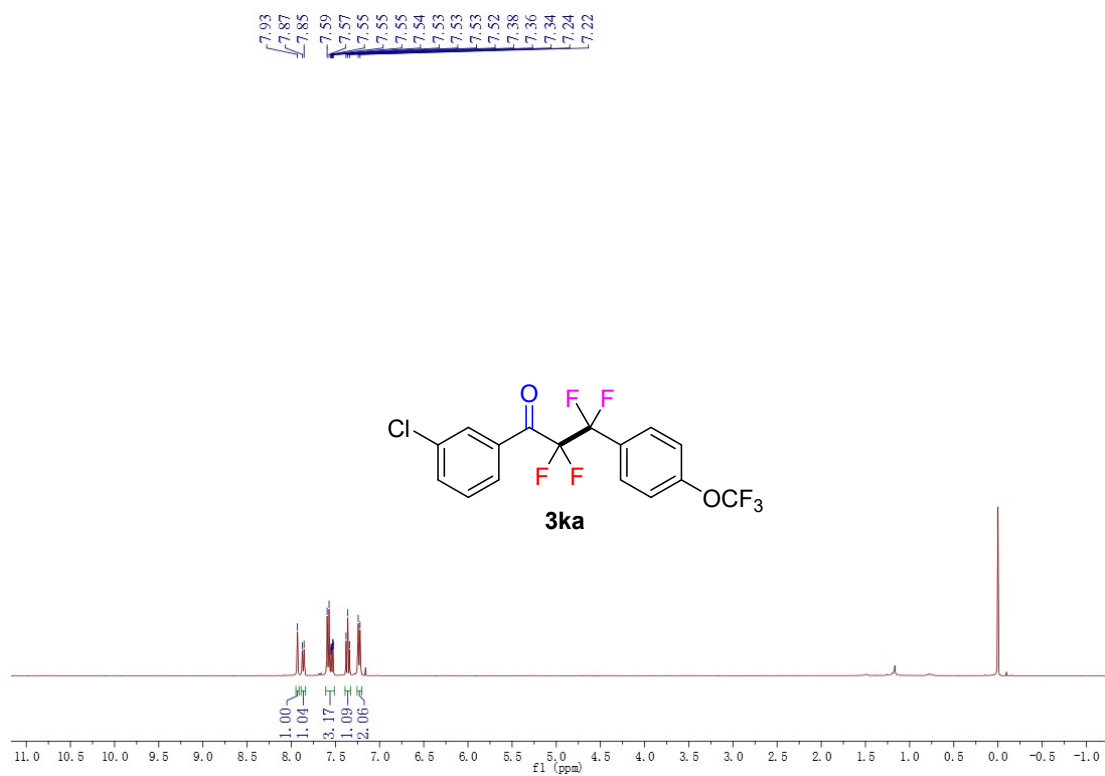

$^1\text{H}$  NMR (400 MHz,  $\text{CDCl}_3$ )

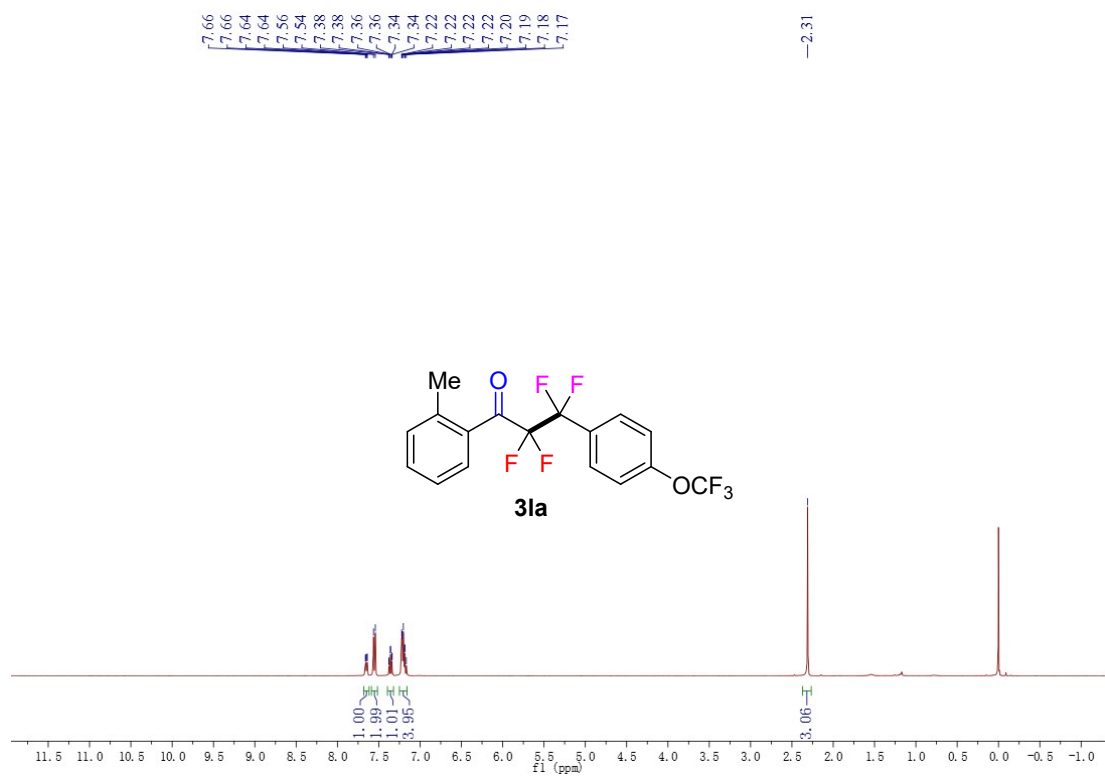

$^{19}\text{F}$  NMR (377 MHz,  $\text{CDCl}_3$ )

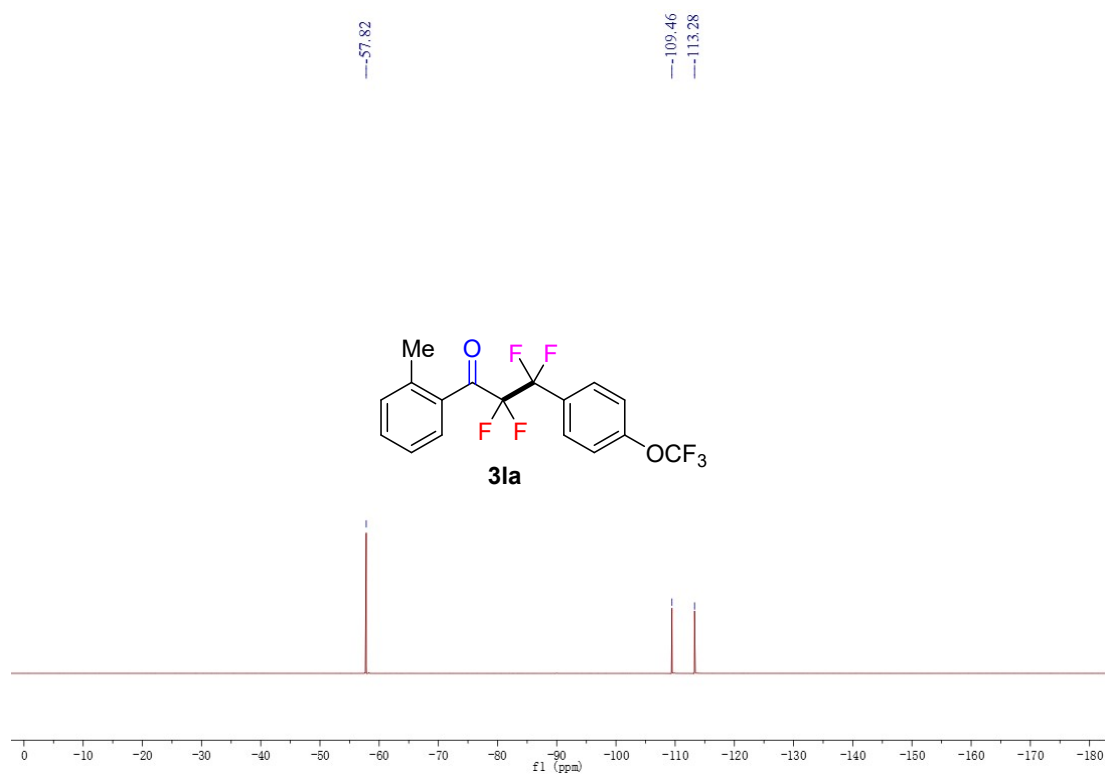

$^{13}\text{C}$  NMR (101 MHz,  $\text{CDCl}_3$ )

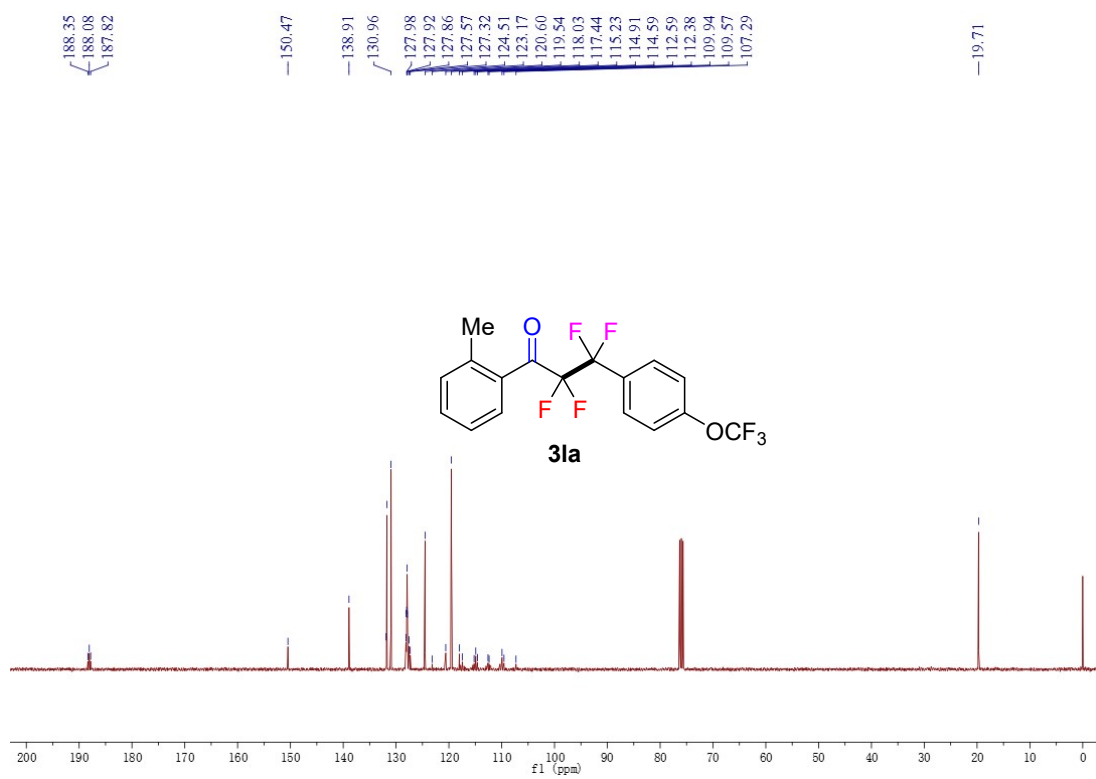

$^1\text{H}$  NMR (400 MHz,  $\text{CDCl}_3$ )

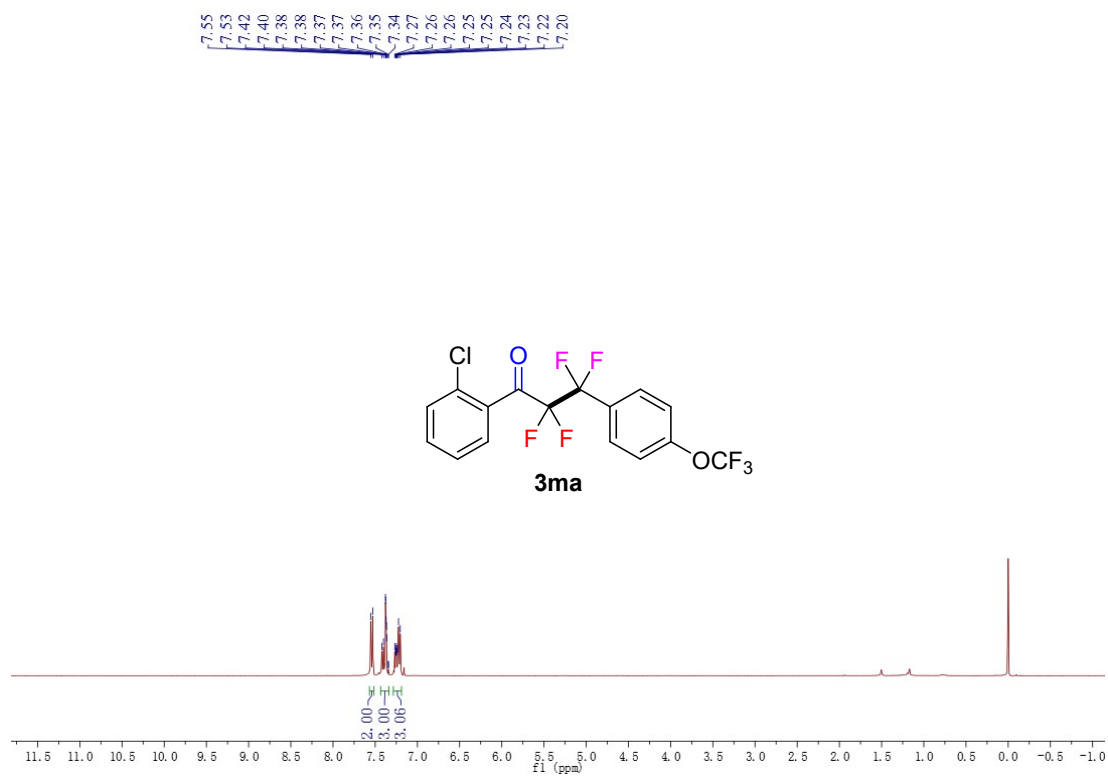

$^{19}\text{F}$  NMR (377 MHz,  $\text{CDCl}_3$ )

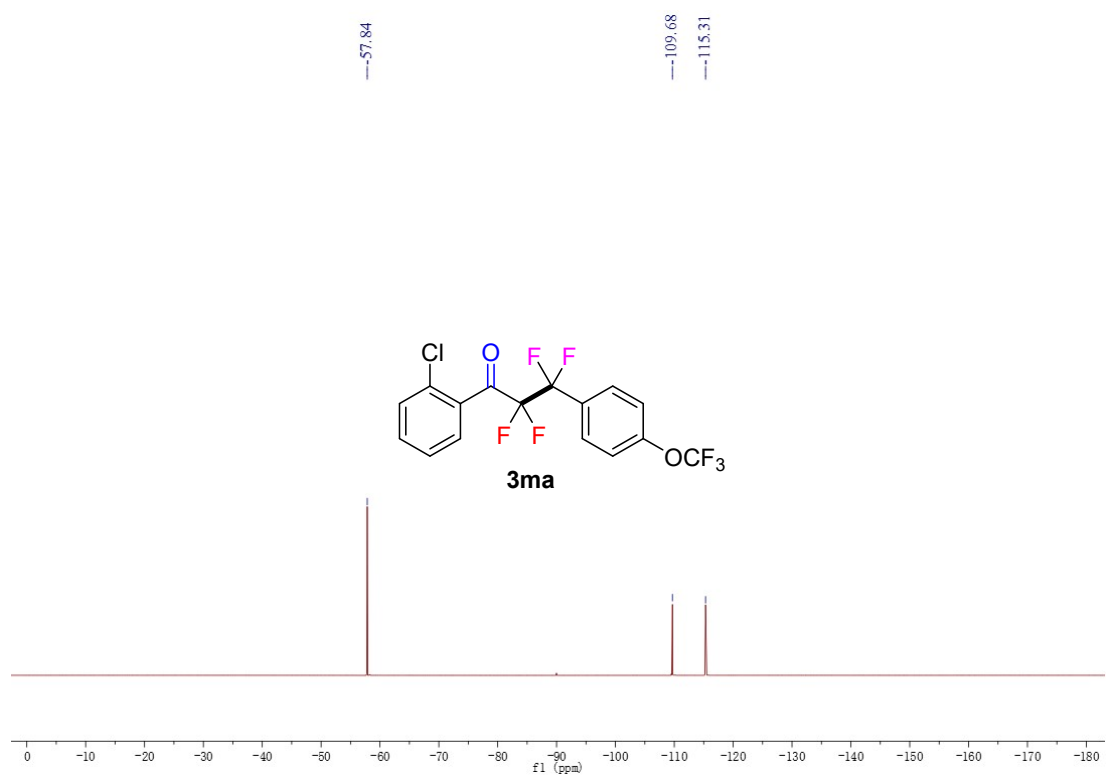

$^{13}\text{C}$  NMR (101 MHz,  $\text{CDCl}_3$ )

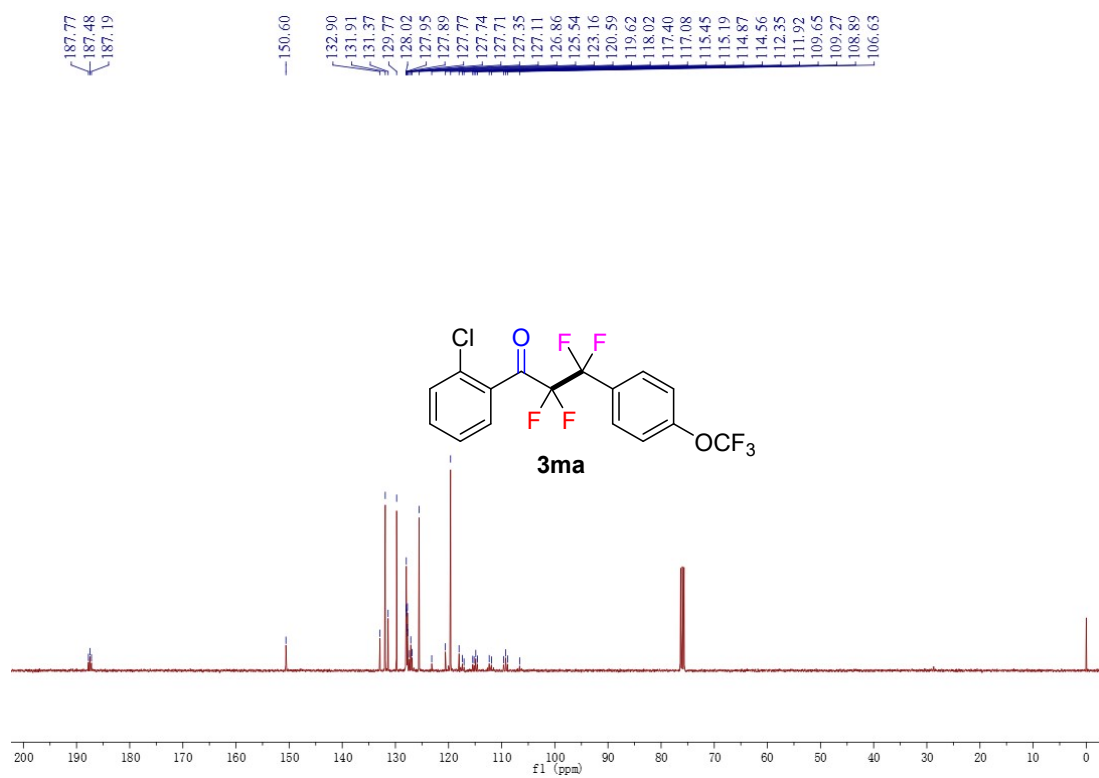

$^{19}\text{F}$  NMR (377 MHz,  $\text{CDCl}_3$ )

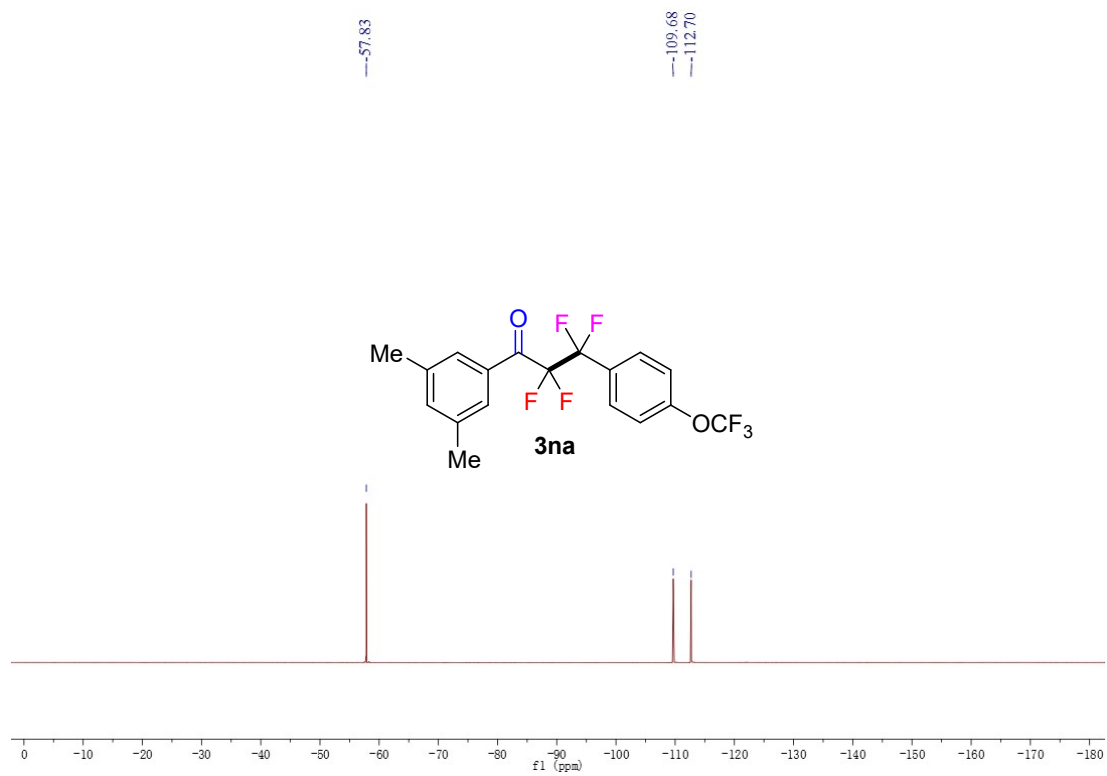

$^1\text{H}$  NMR (400 MHz,  $\text{CDCl}_3$ )

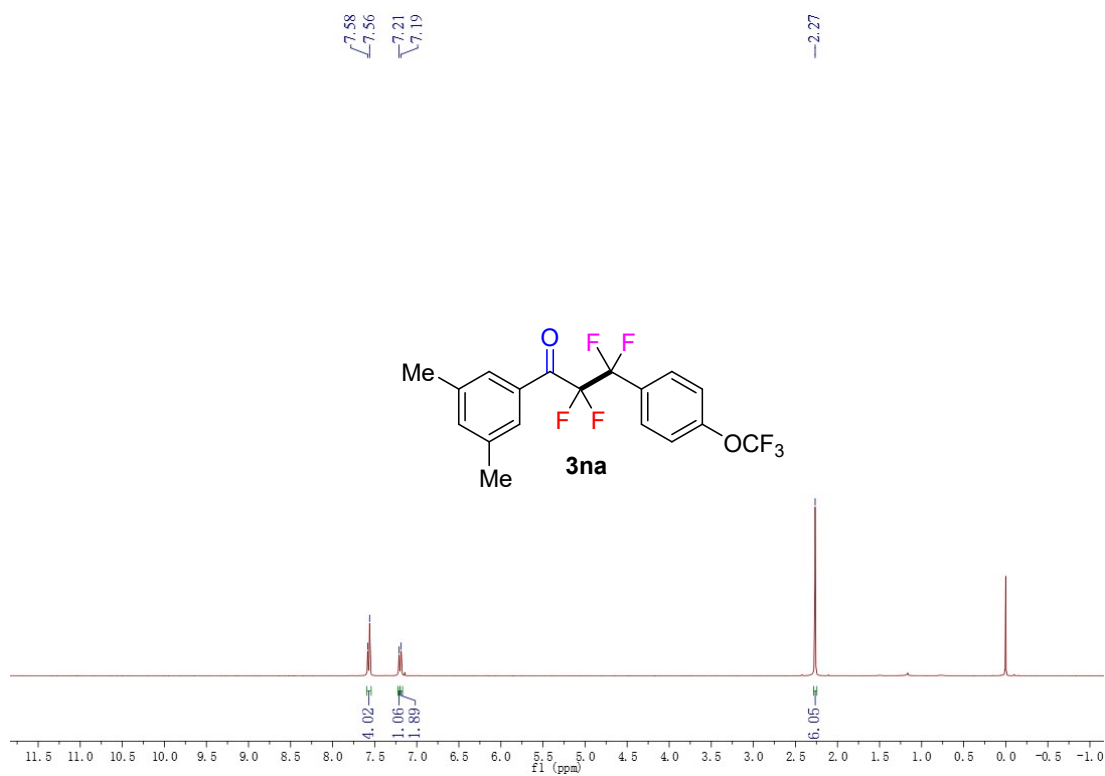

$^{13}\text{C}$  NMR (101 MHz,  $\text{CDCl}_3$ )

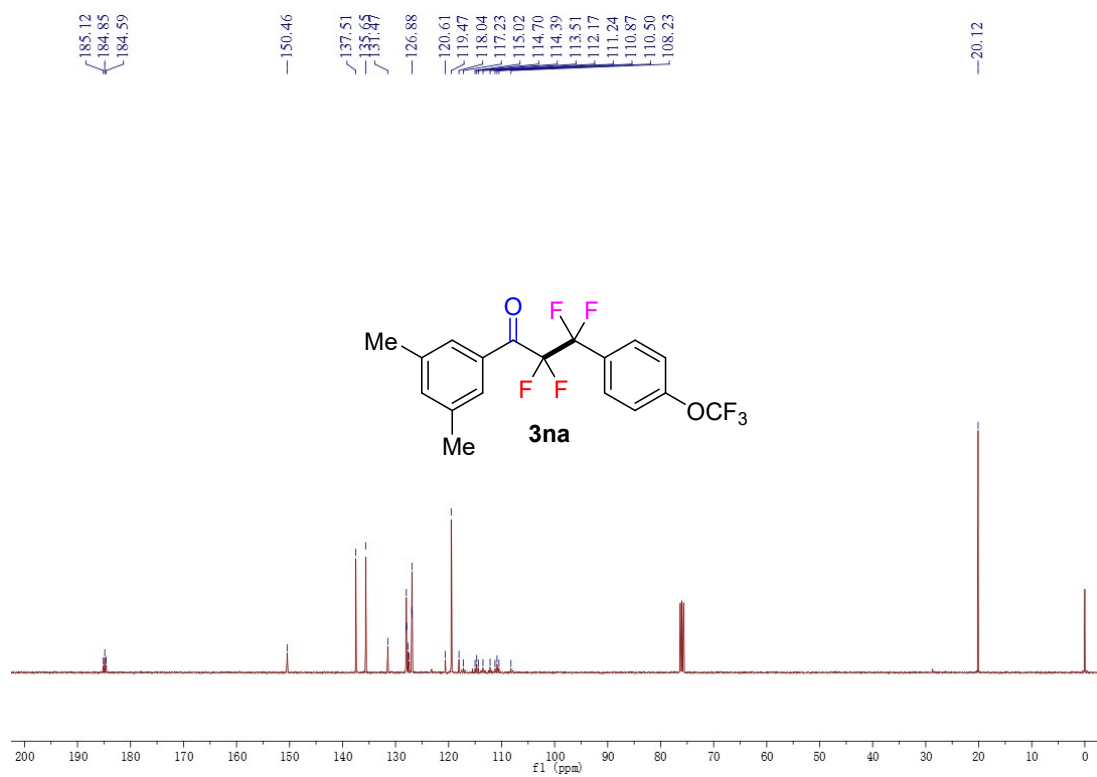

$^1\text{H}$  NMR (400 MHz,  $\text{CDCl}_3$ )

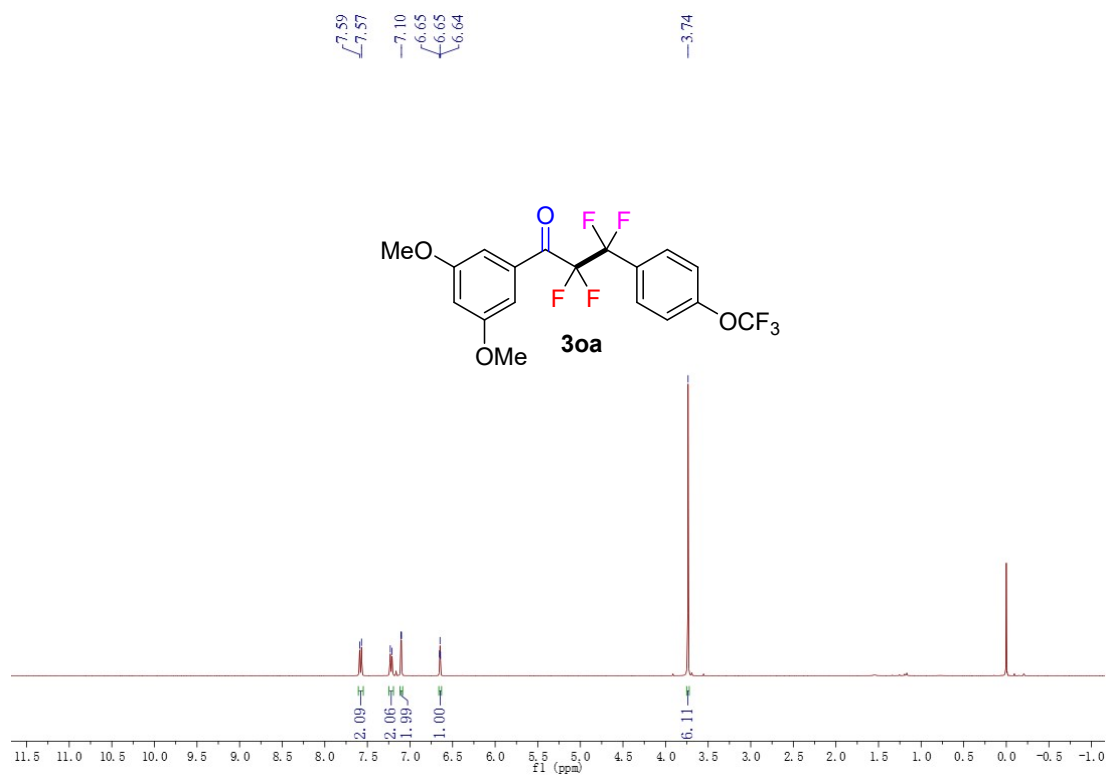

<sup>19</sup>F NMR (377 MHz, CDCl<sub>3</sub>)

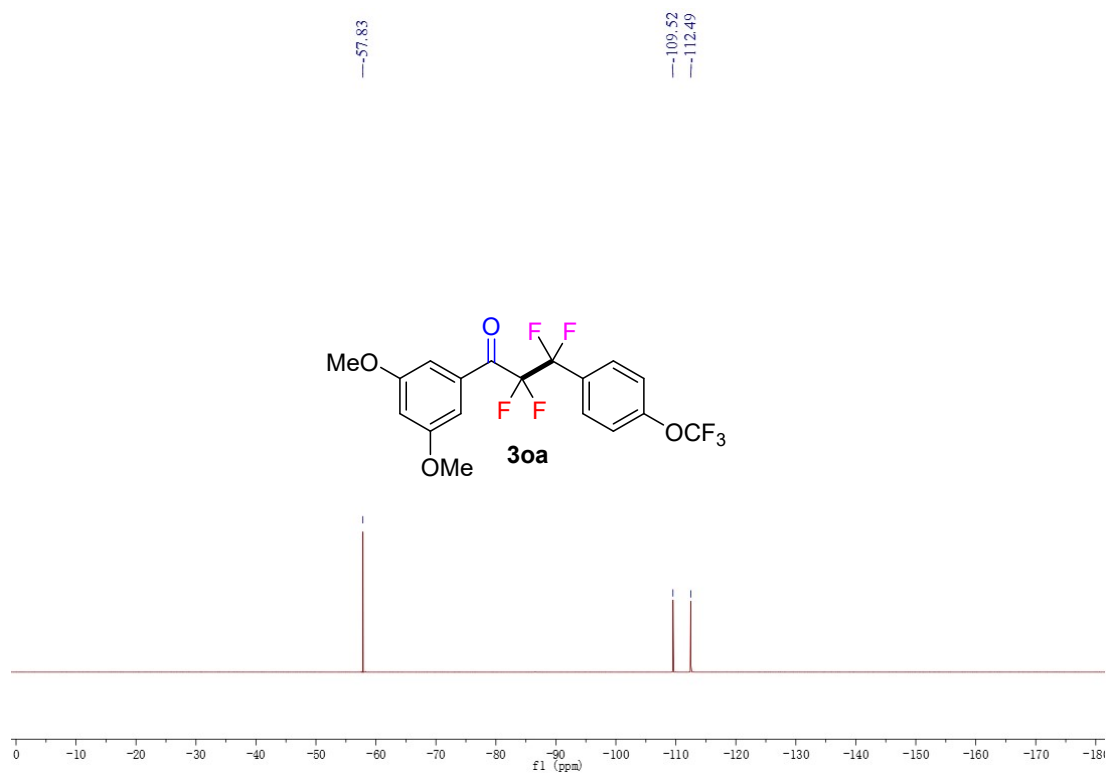

<sup>13</sup>C NMR (101 MHz, CDCl<sub>3</sub>)



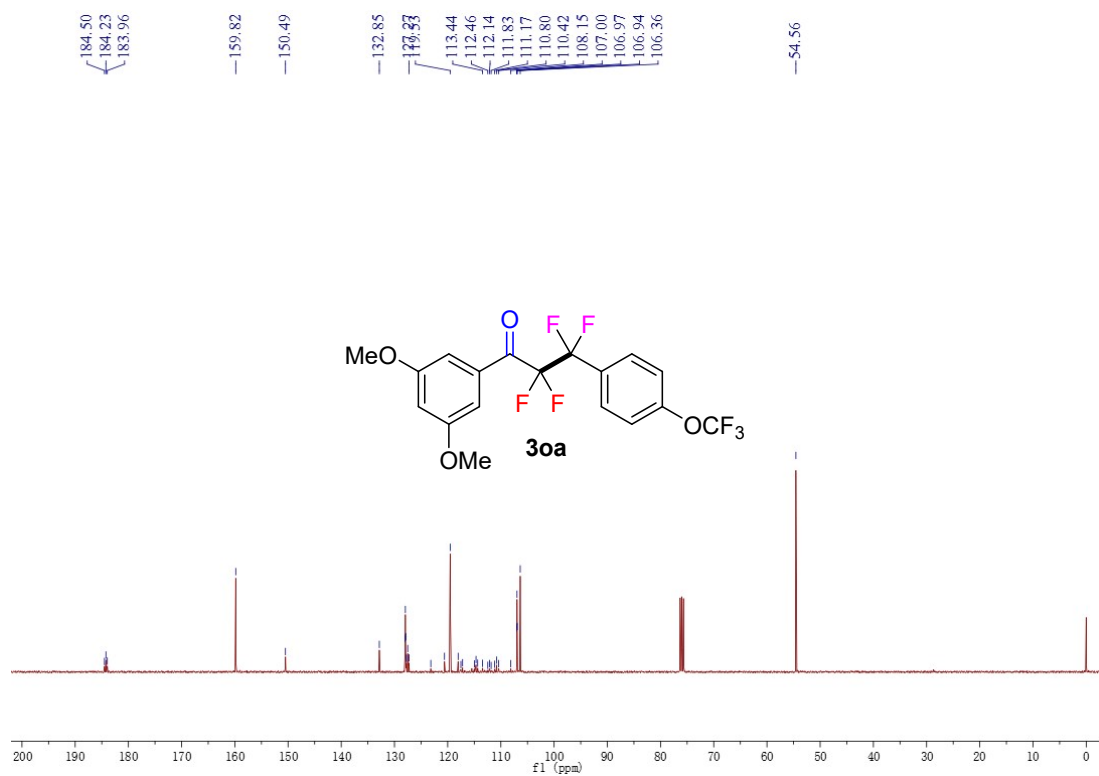

$^1\text{H}$  NMR (400 MHz,  $\text{CDCl}_3$ )

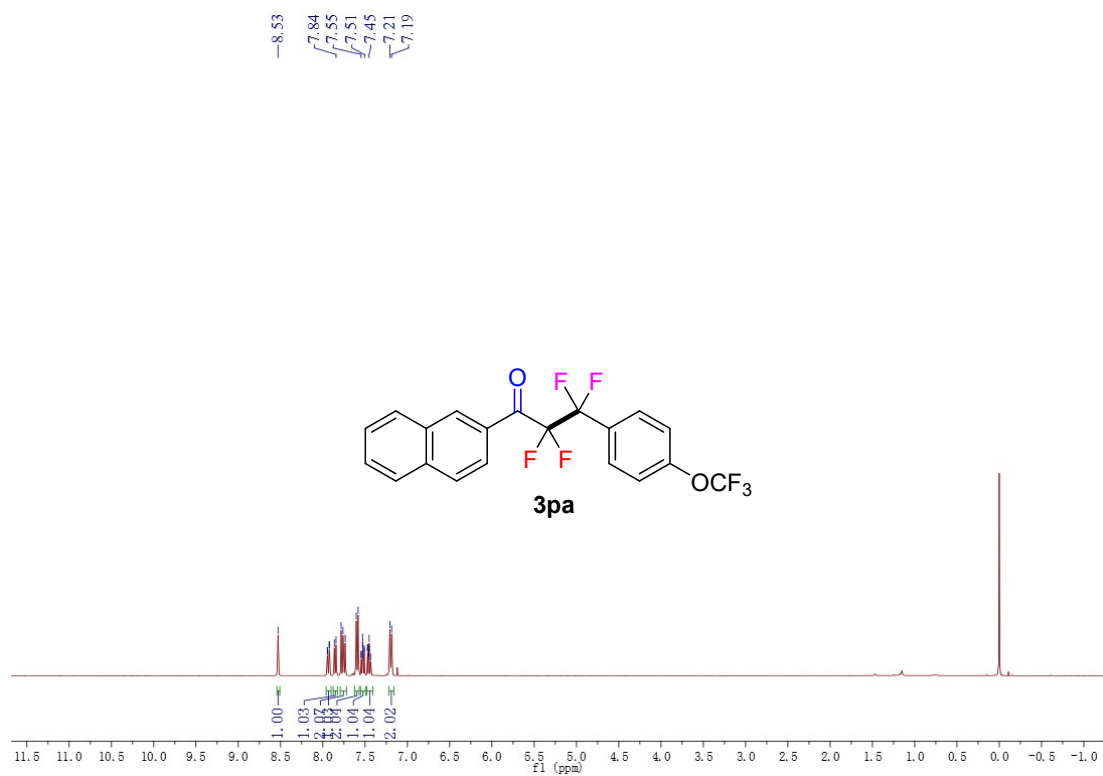

$^{19}\text{F}$  NMR (377 MHz,  $\text{CDCl}_3$ )

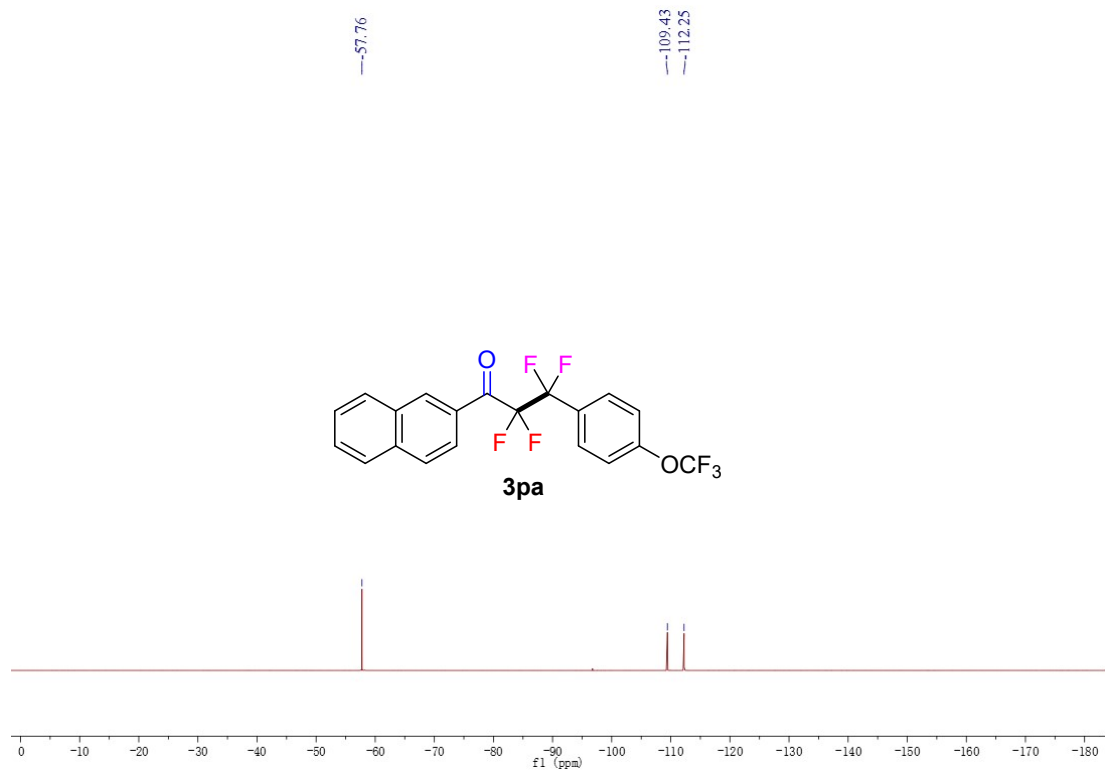

$^{13}\text{C}$  NMR (101 MHz,  $\text{CDCl}_3$ )

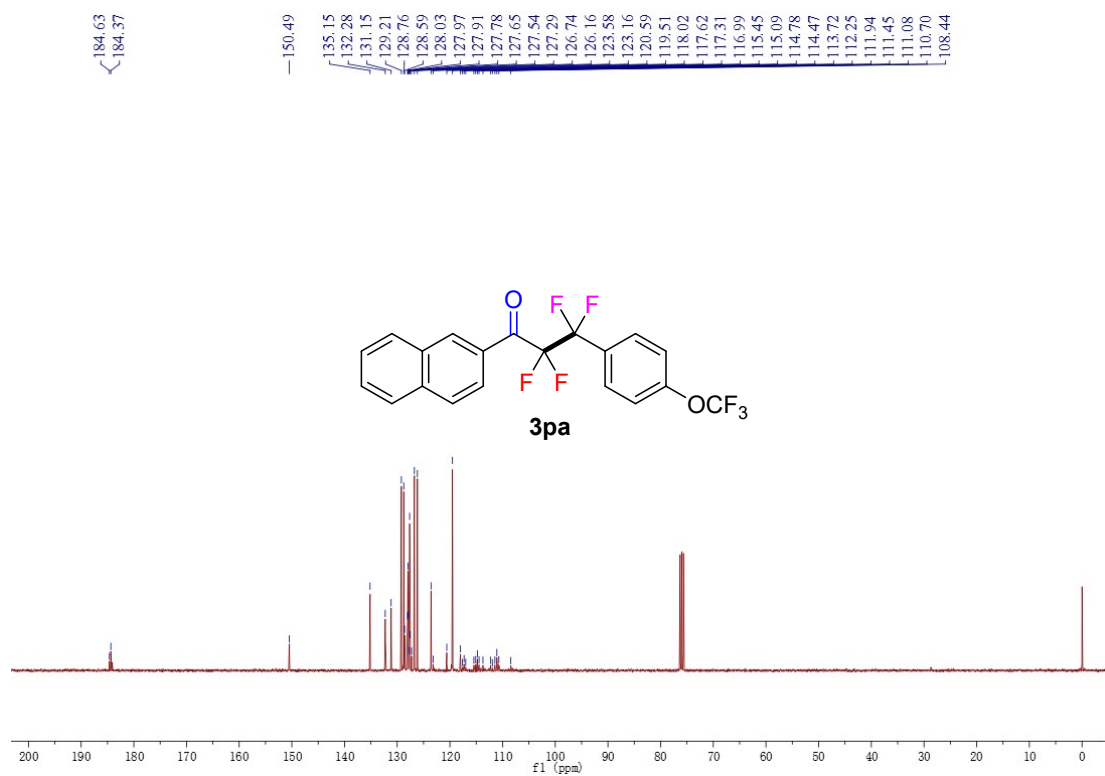

$^1\text{H}$  NMR (400 MHz,  $\text{CDCl}_3$ )

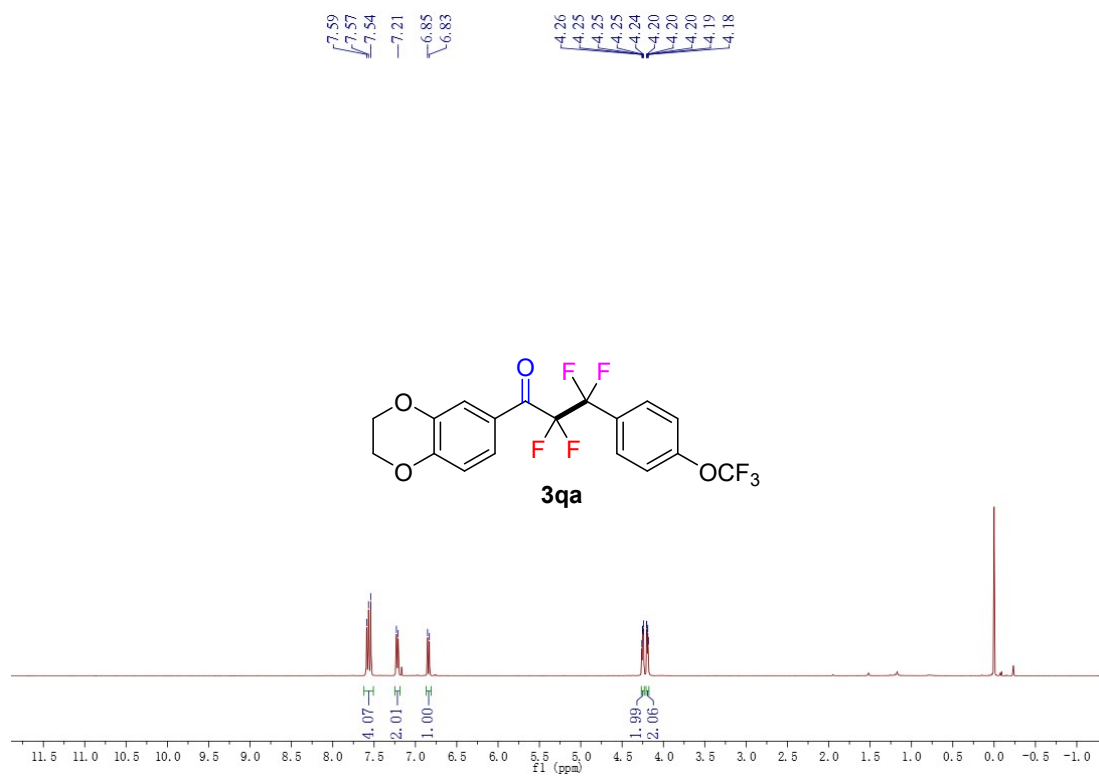

$^{19}\text{F}$  NMR (377 MHz,  $\text{CDCl}_3$ )

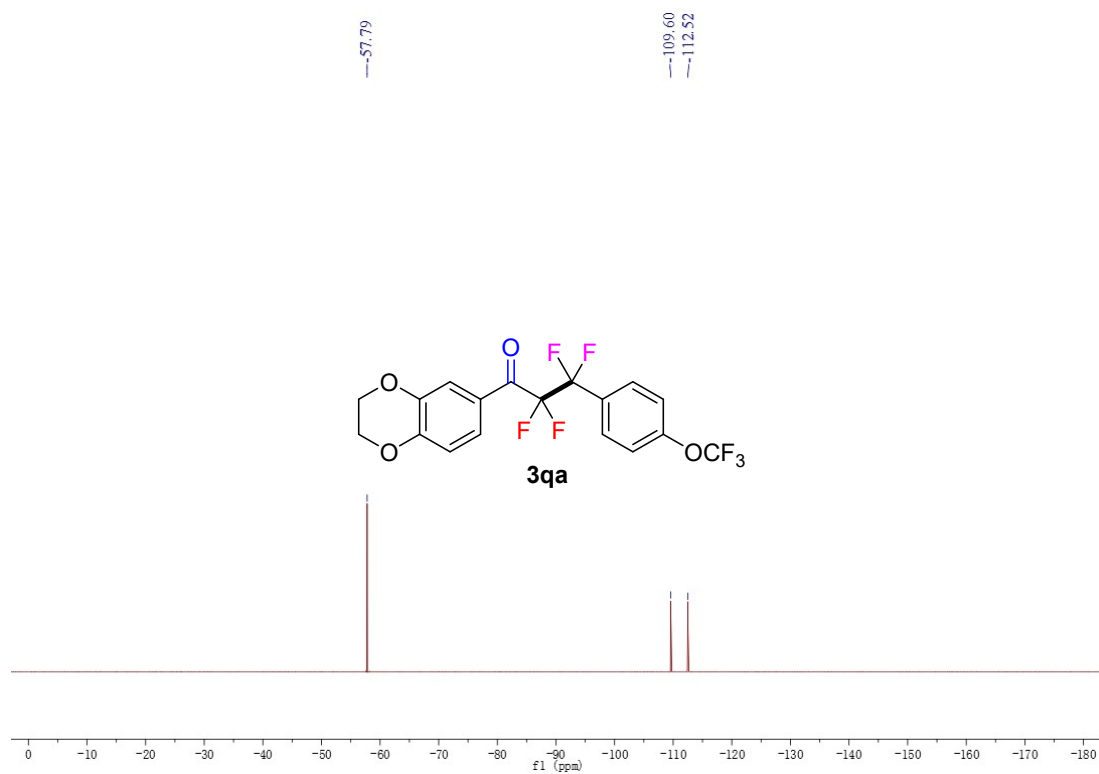

$^{13}\text{C}$  NMR (101 MHz,  $\text{CDCl}_3$ )

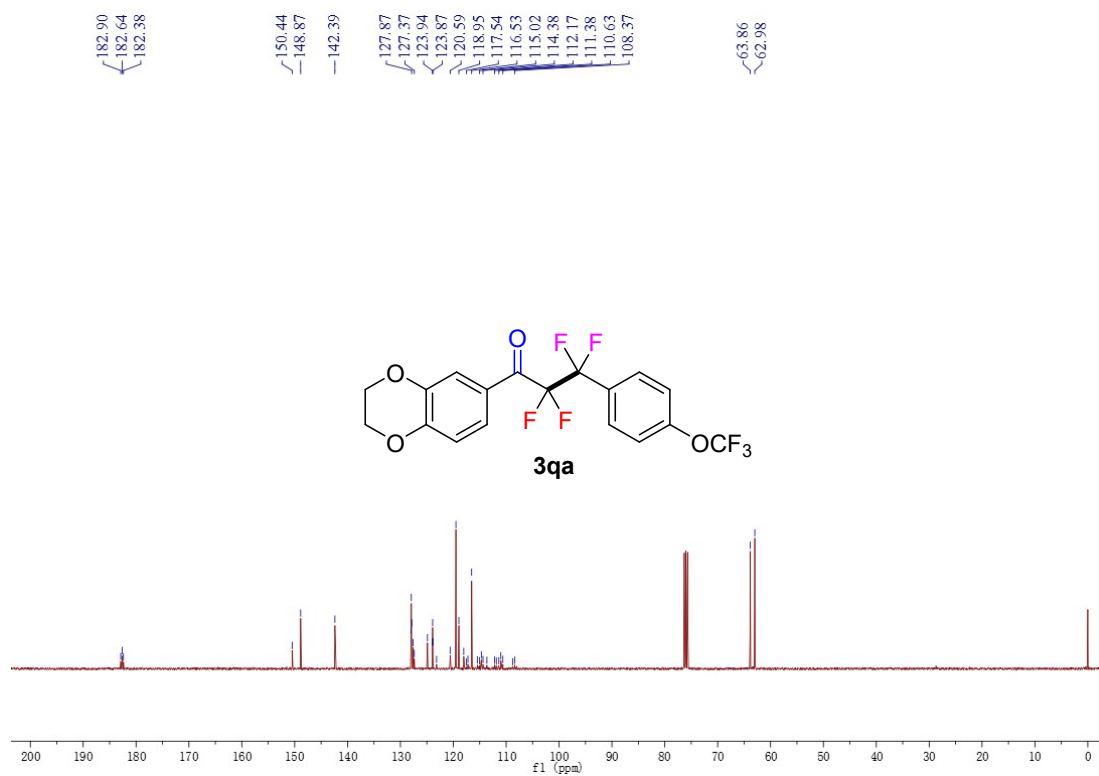

<sup>1</sup>H NMR (400 MHz, CDCl<sub>3</sub>)

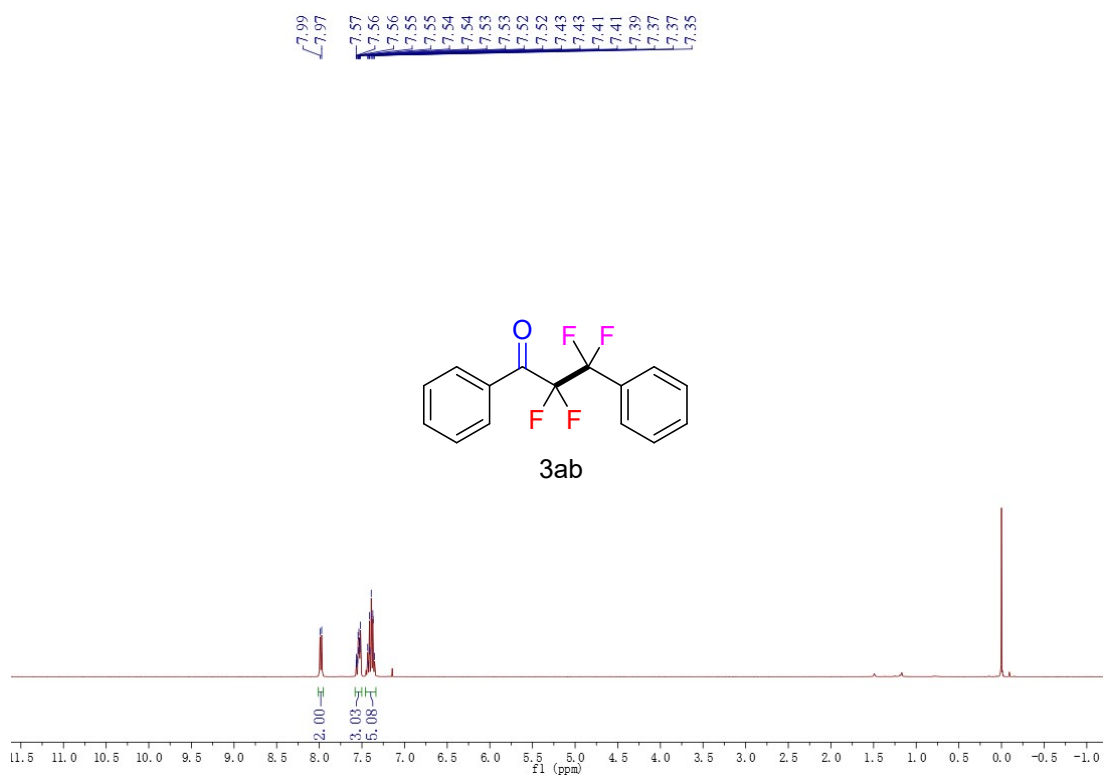

<sup>19</sup>F NMR (377 MHz, CDCl<sub>3</sub>)

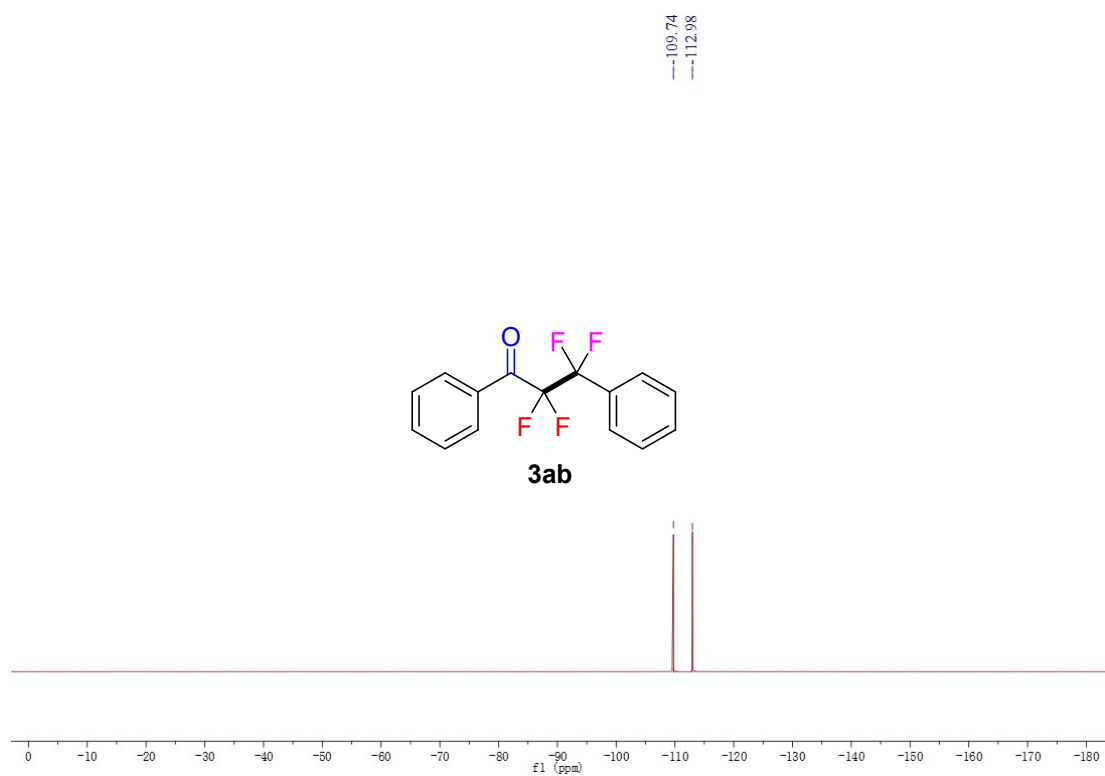

$^{13}\text{C}$  NMR (101 MHz,  $\text{CDCl}_3$ )

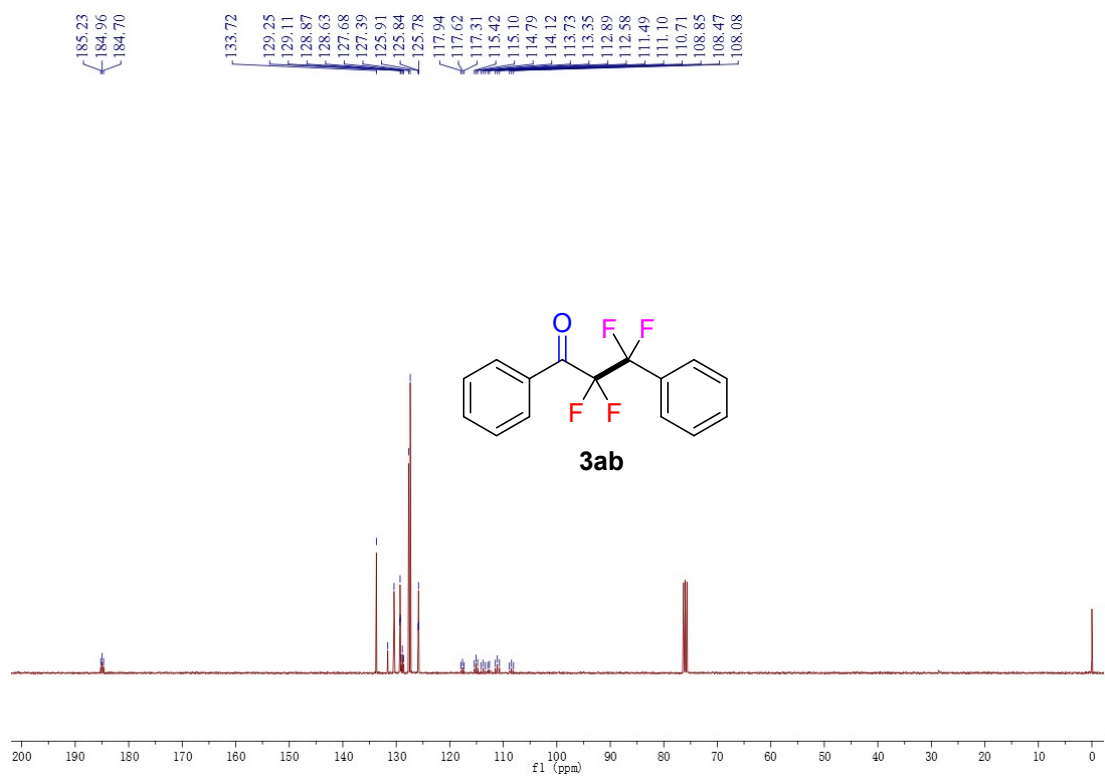

$^1\text{H}$  NMR (400 MHz,  $\text{CDCl}_3$ )

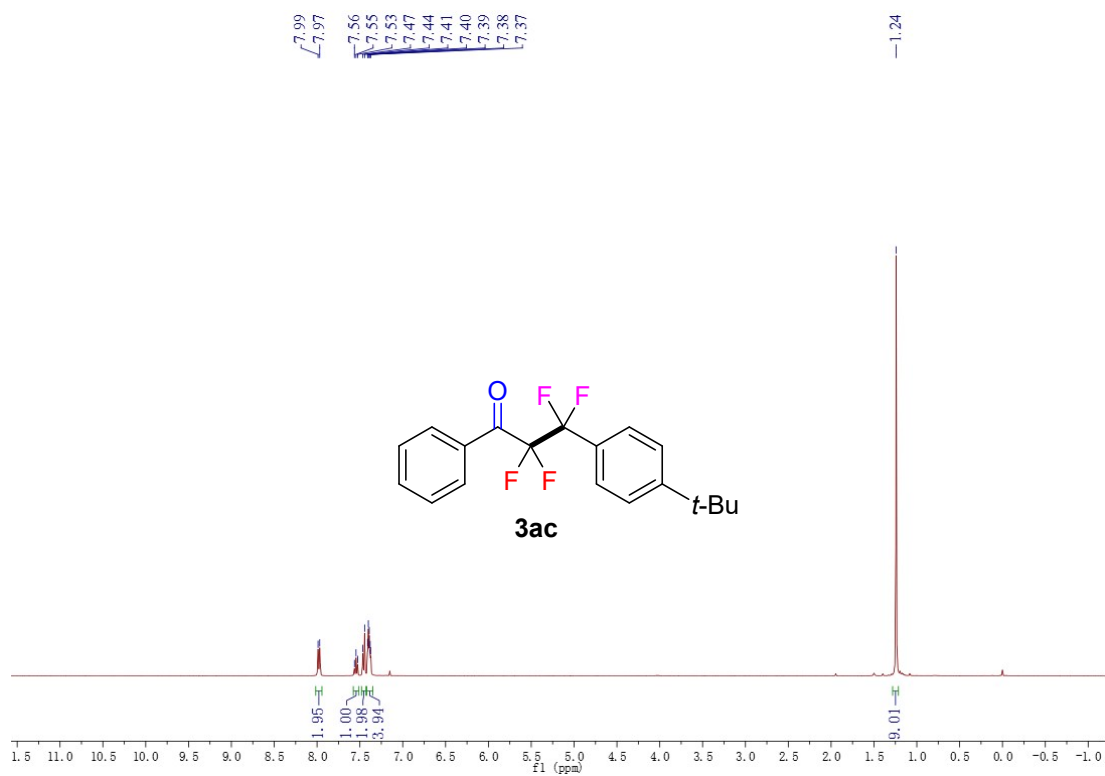

**<sup>19</sup>F NMR (377 MHz, CDCl<sub>3</sub>)**

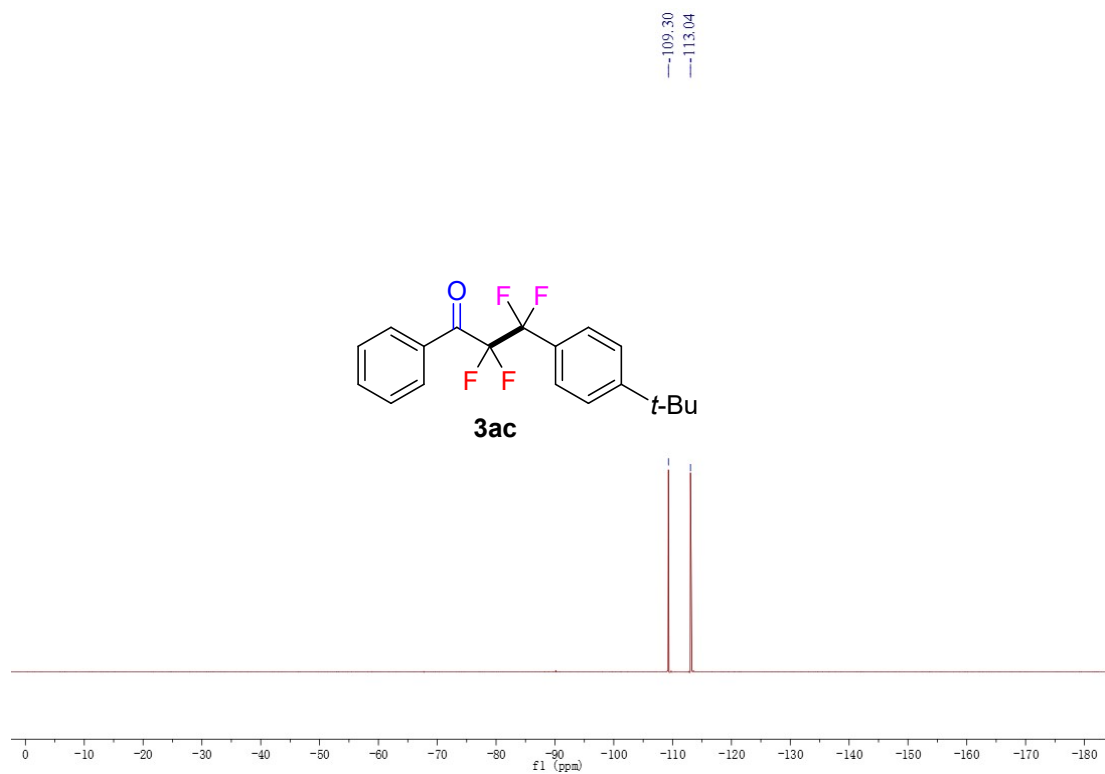

**<sup>13</sup>C NMR (101 MHz, CDCl<sub>3</sub>)**

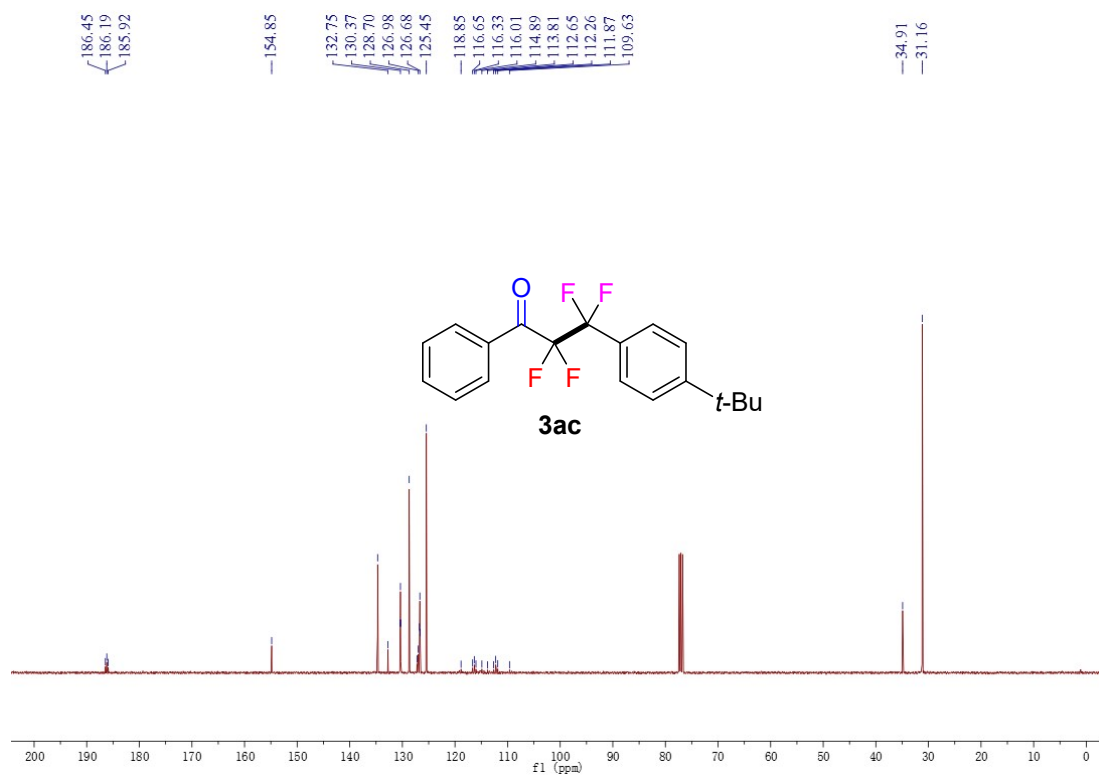

$^1\text{H}$  NMR (400 MHz,  $\text{CDCl}_3$ )

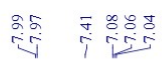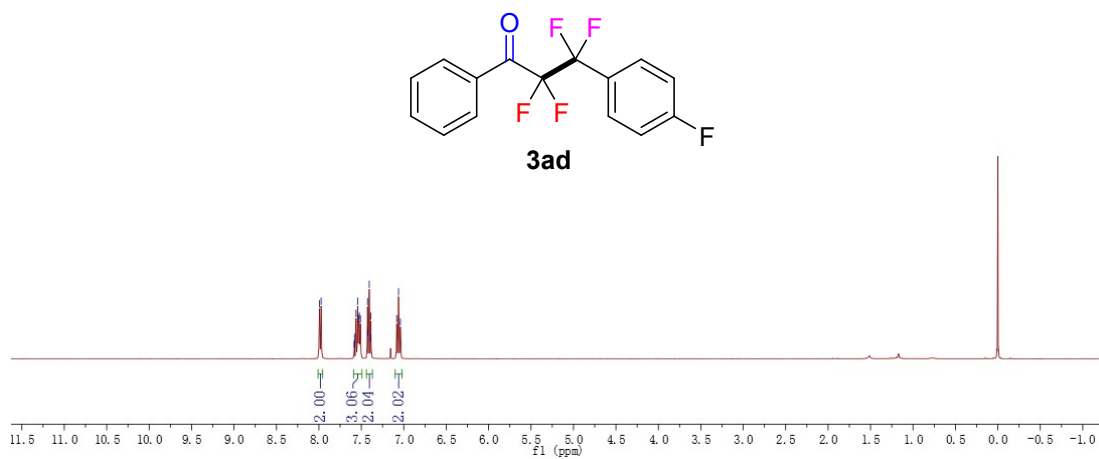

$^{19}\text{F}$  NMR (377 MHz,  $\text{CDCl}_3$ )

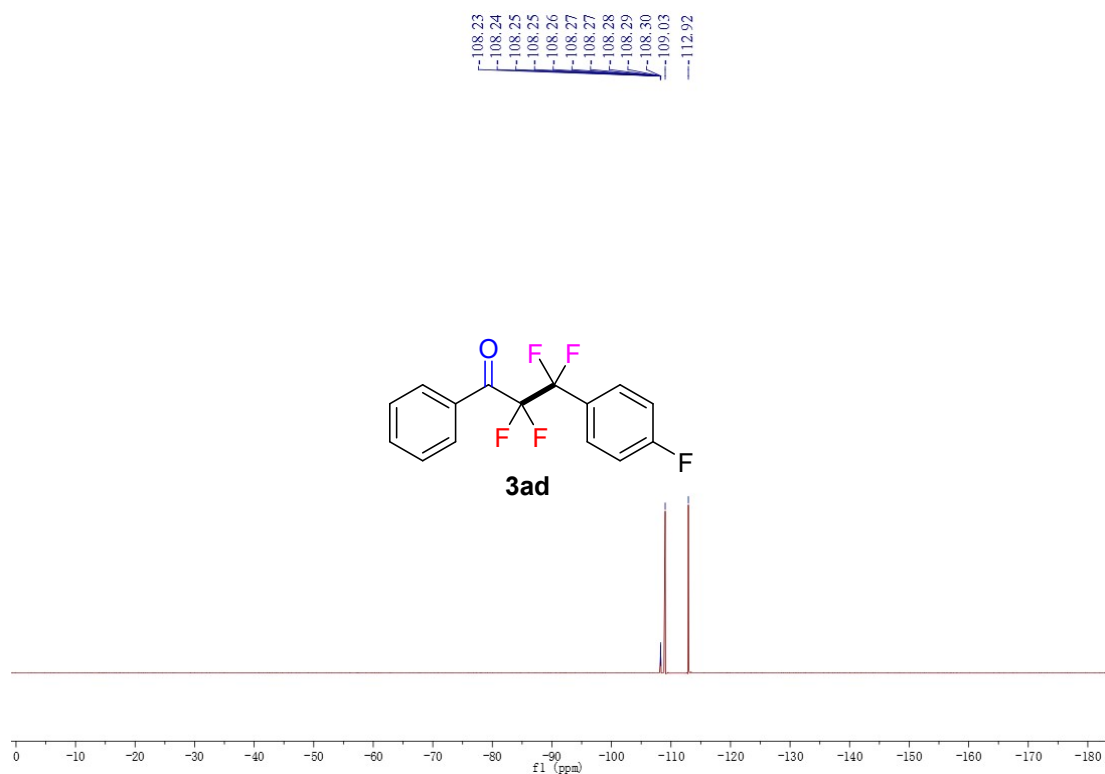

<sup>13</sup>C NMR (101 MHz, CDCl<sub>3</sub>)

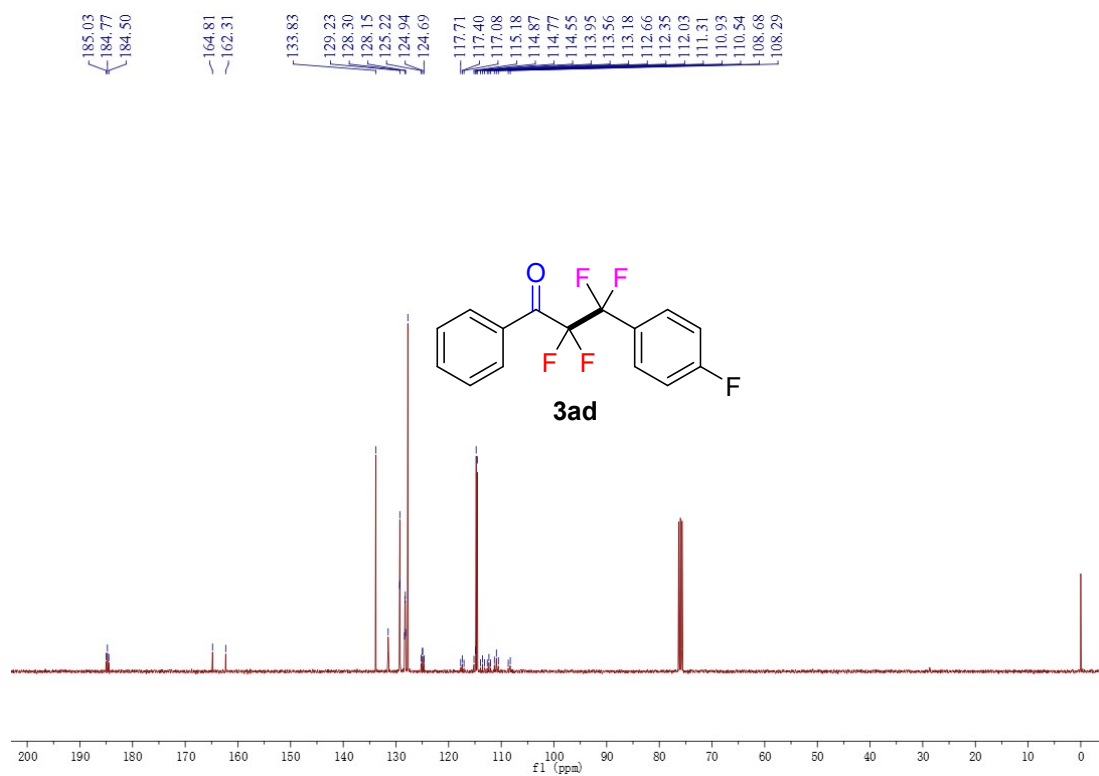

<sup>1</sup>H NMR (400 MHz, CDCl<sub>3</sub>)



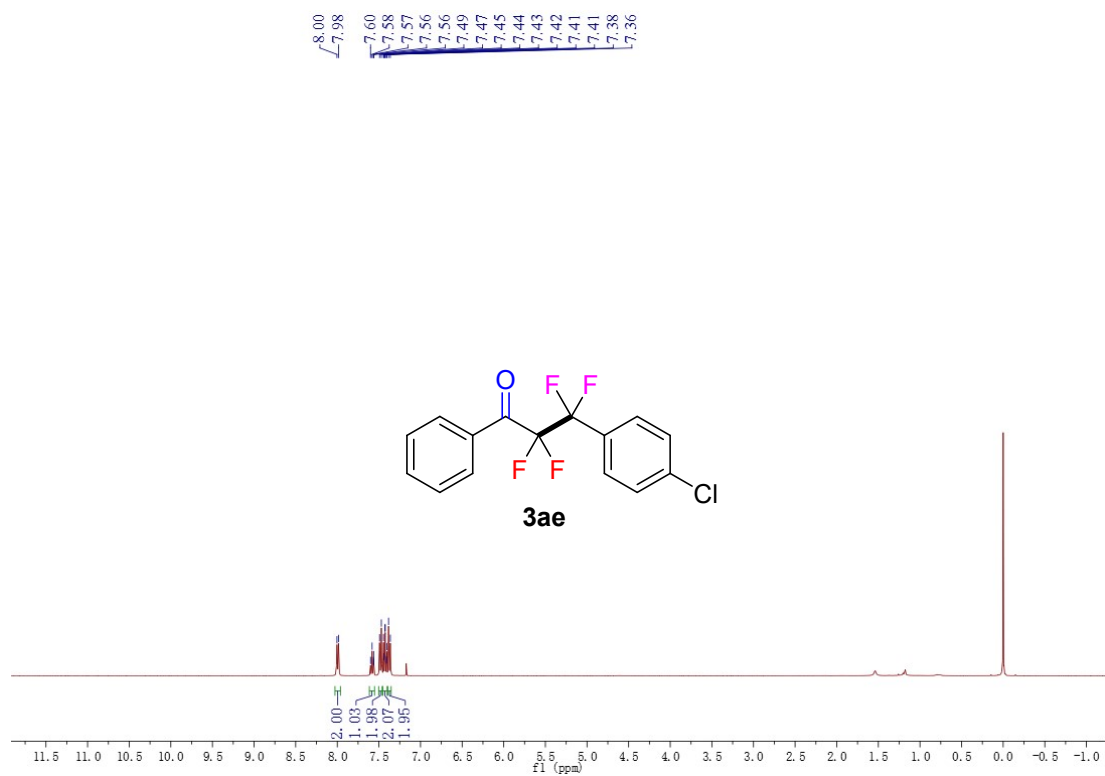

<sup>19</sup>F NMR (377 MHz, CDCl<sub>3</sub>)

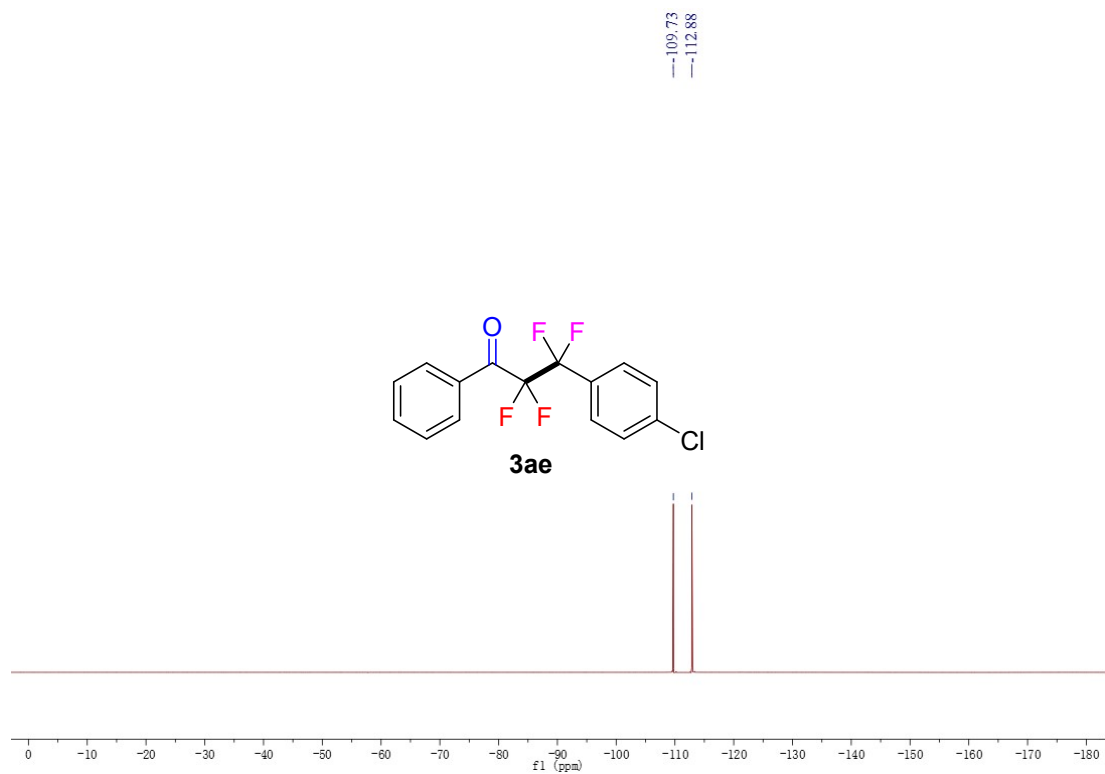

<sup>13</sup>C NMR (101 MHz, CDCl<sub>3</sub>)

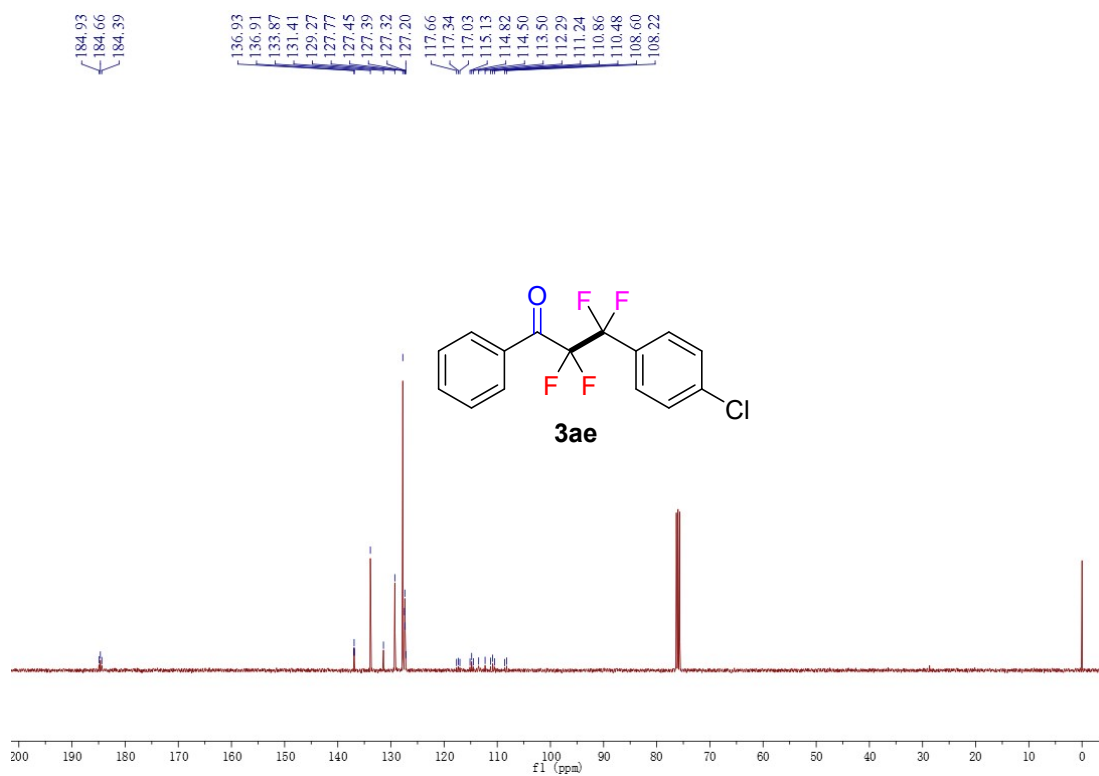

<sup>13</sup>C NMR (101 MHz, CDCl<sub>3</sub>)

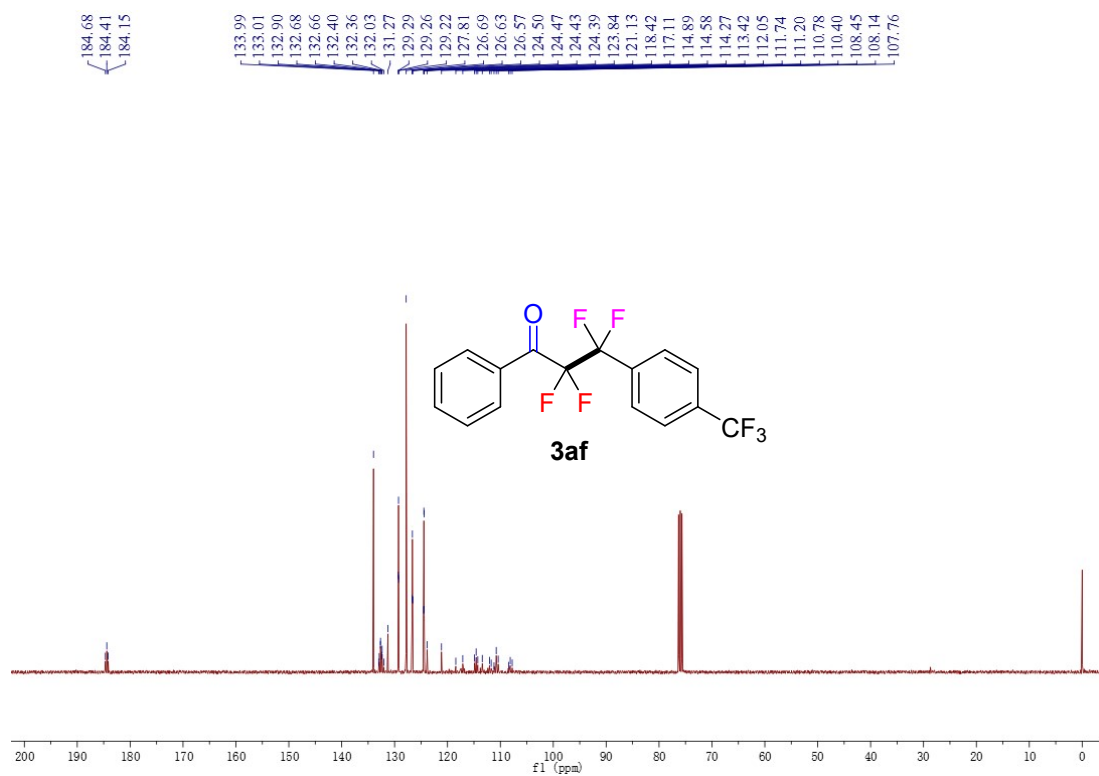

<sup>1</sup>H NMR (400 MHz, CDCl<sub>3</sub>)

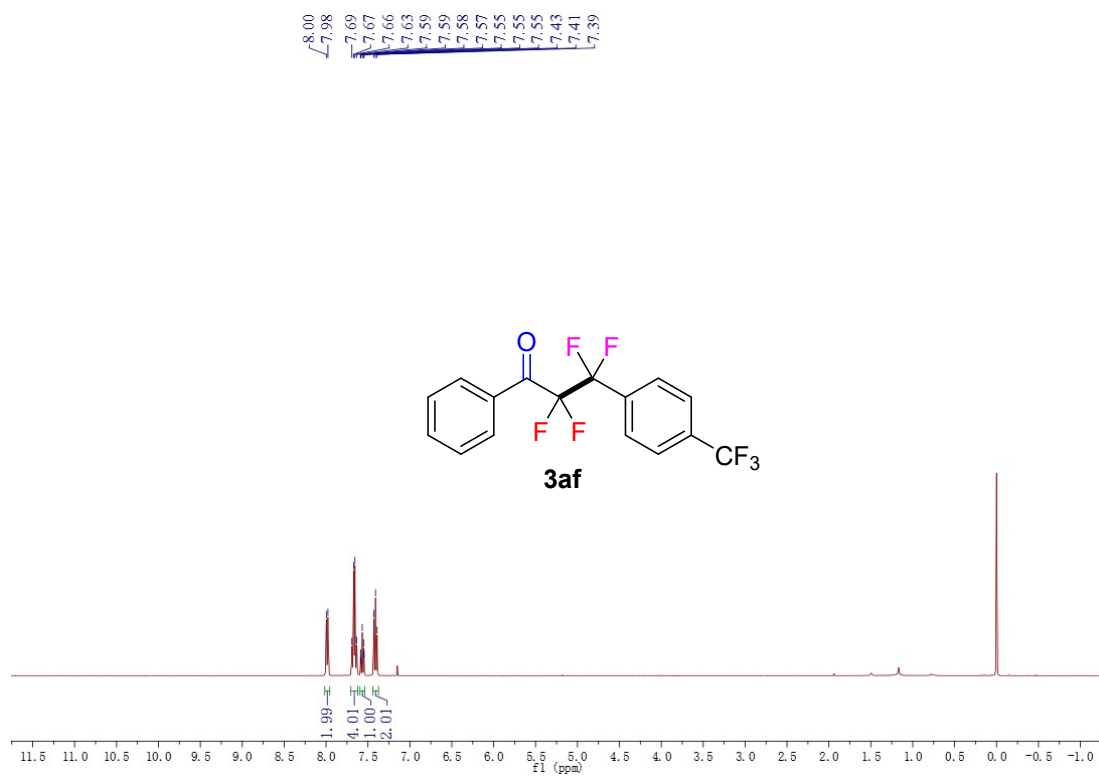

**<sup>19</sup>F NMR (377 MHz, CDCl<sub>3</sub>)**

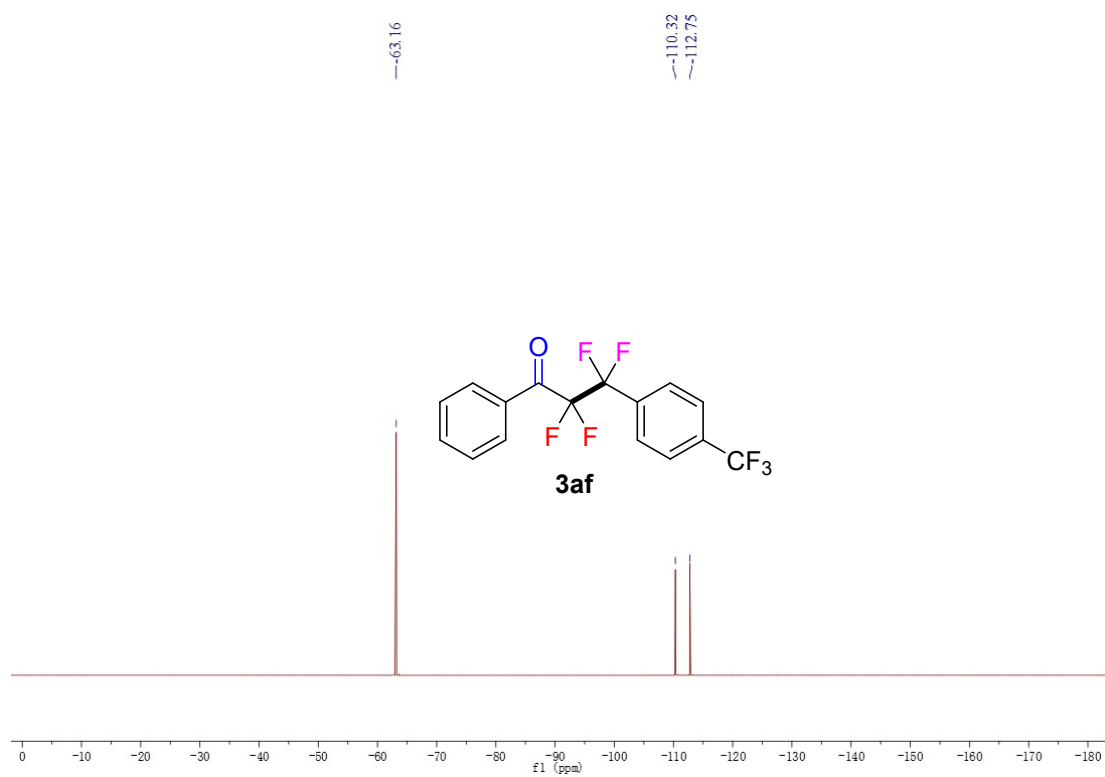

**<sup>1</sup>H NMR (400 MHz, CDCl<sub>3</sub>)**

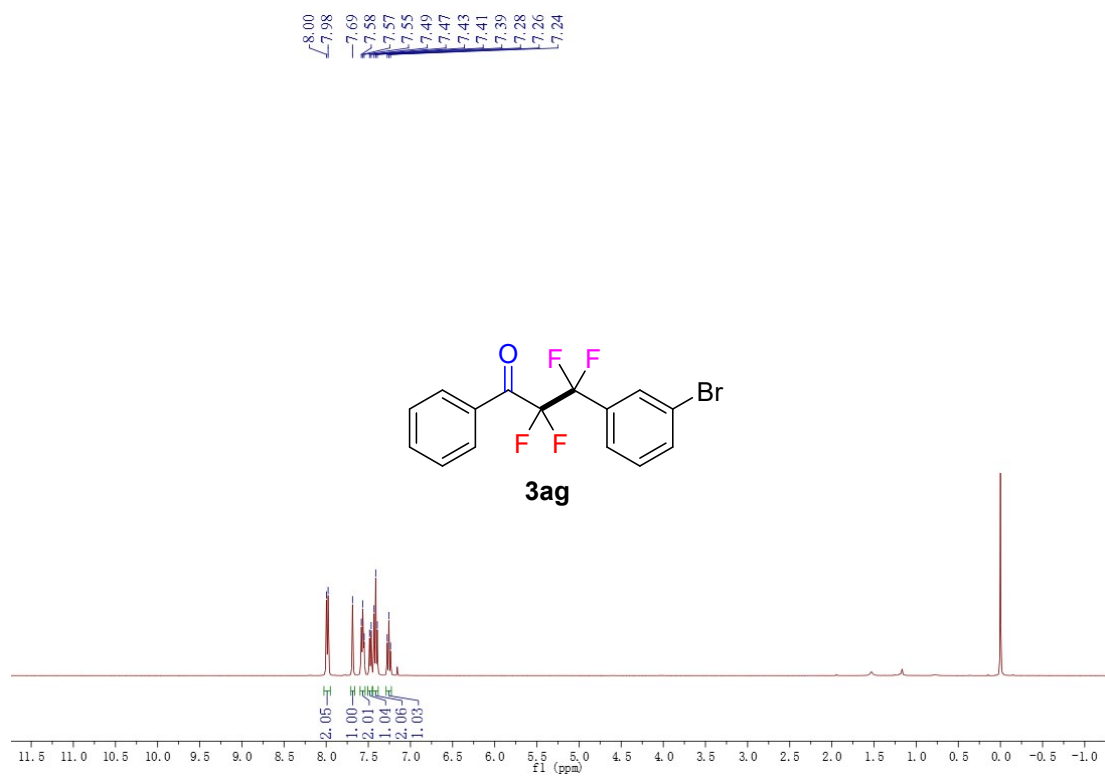

<sup>19</sup>F NMR (377 MHz, CDCl<sub>3</sub>)

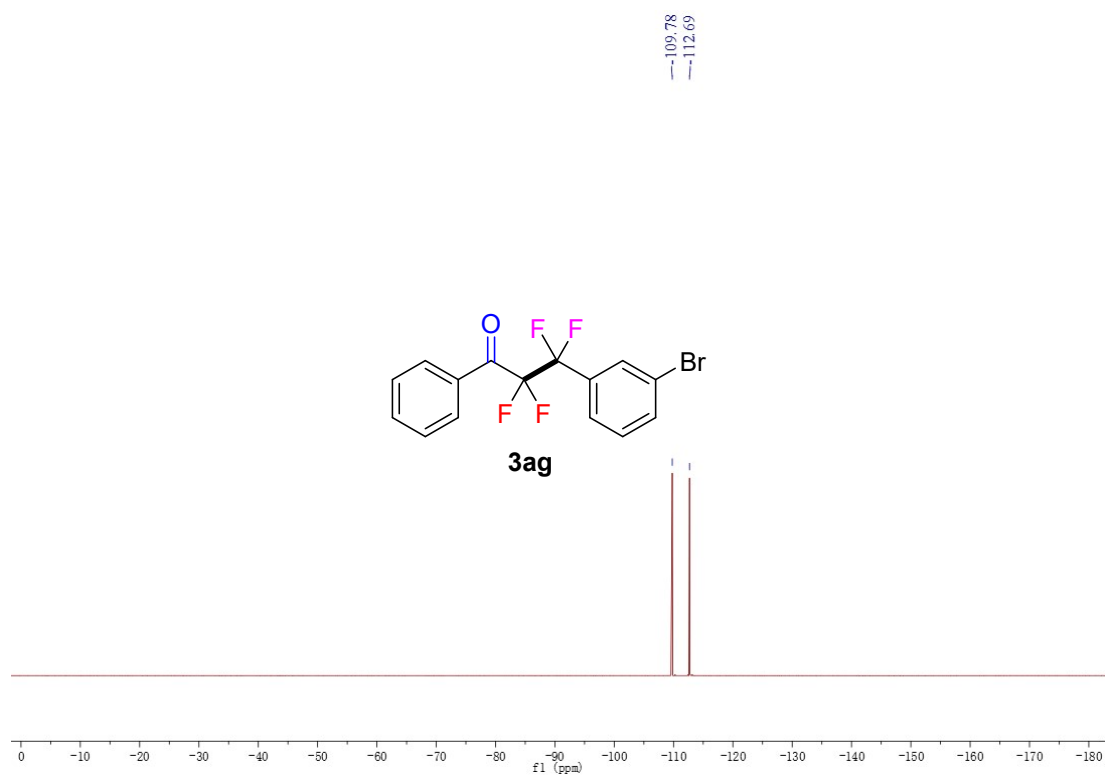

$^{13}\text{C}$  NMR (101 MHz,  $\text{CDCl}_3$ )

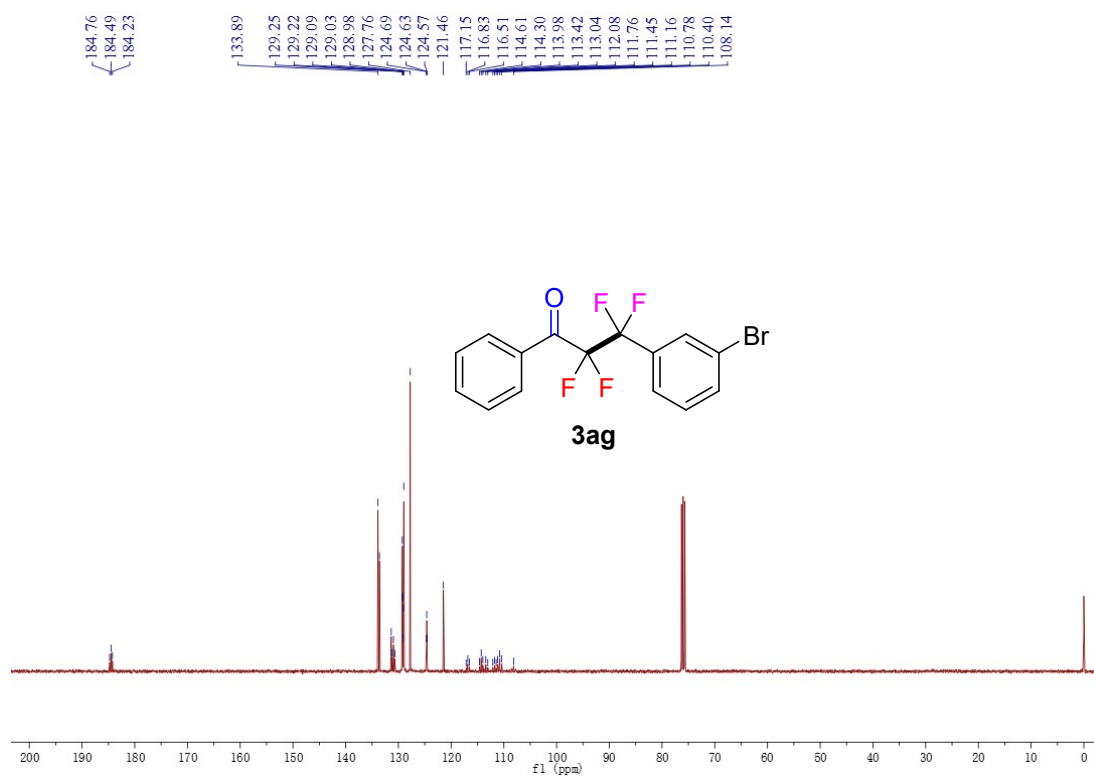

$^1\text{H}$  NMR (400 MHz,  $\text{CDCl}_3$ )

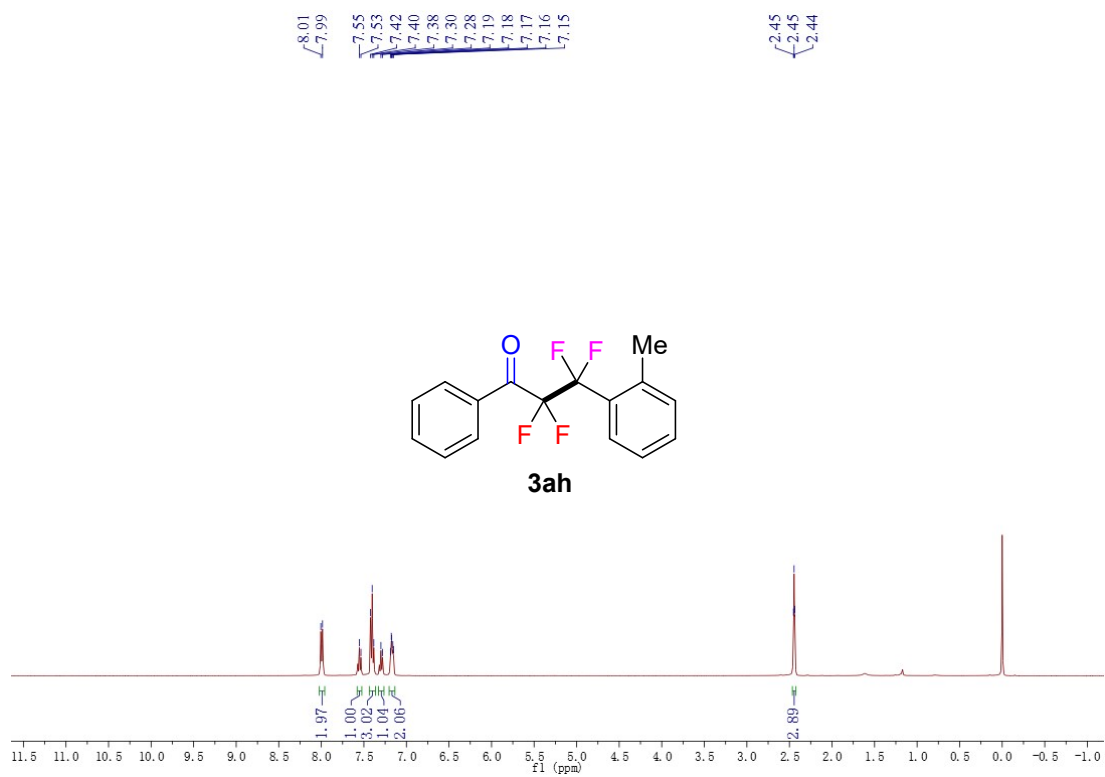

$^{19}\text{F}$  NMR (377 MHz,  $\text{CDCl}_3$ )

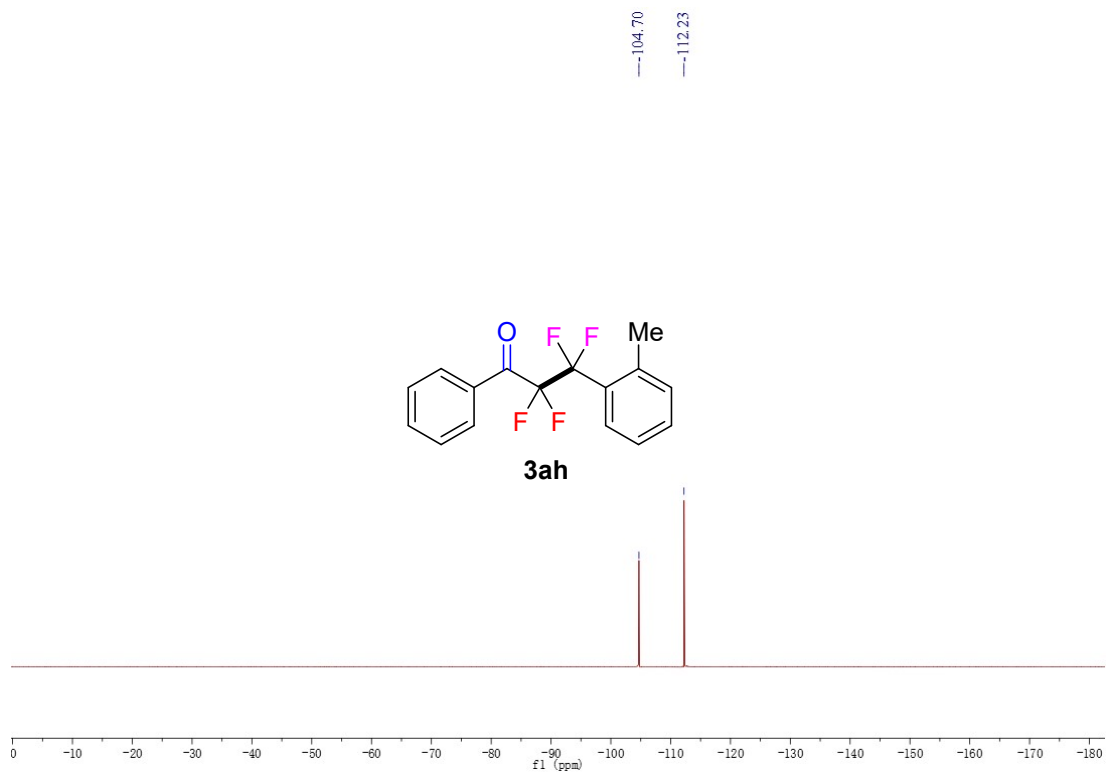

$^{13}\text{C}$  NMR (101 MHz,  $\text{CDCl}_3$ )

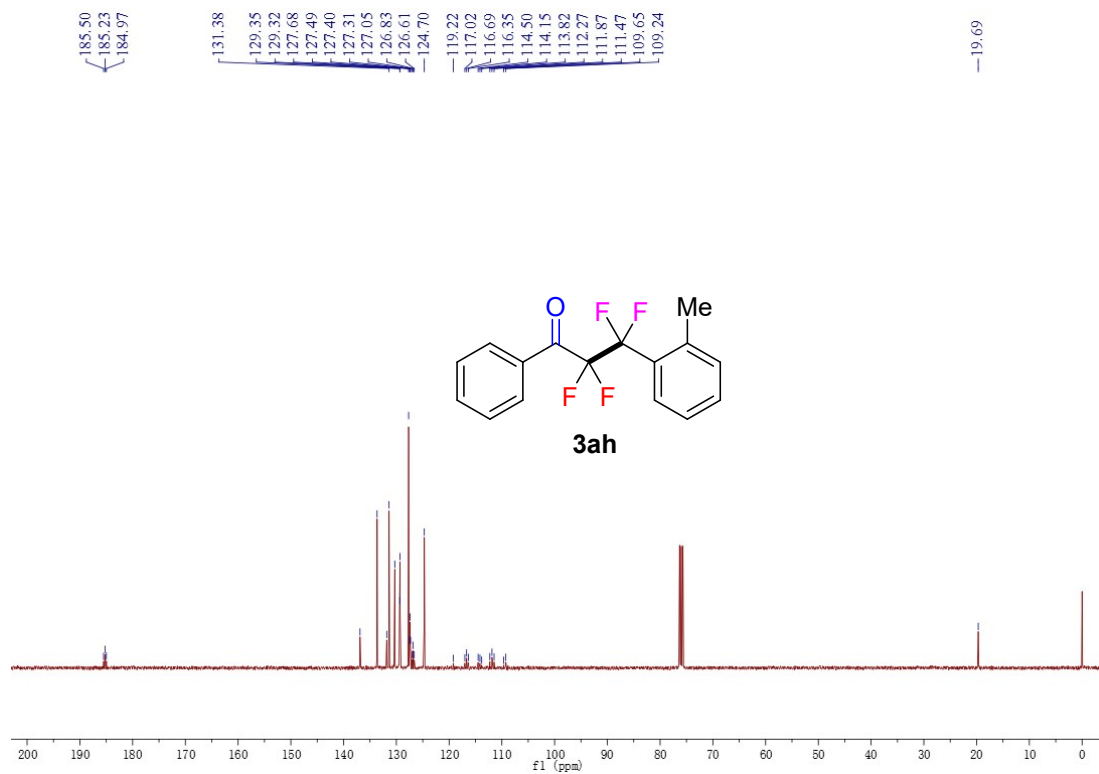

$^1\text{H}$  NMR (400 MHz,  $\text{CDCl}_3$ )

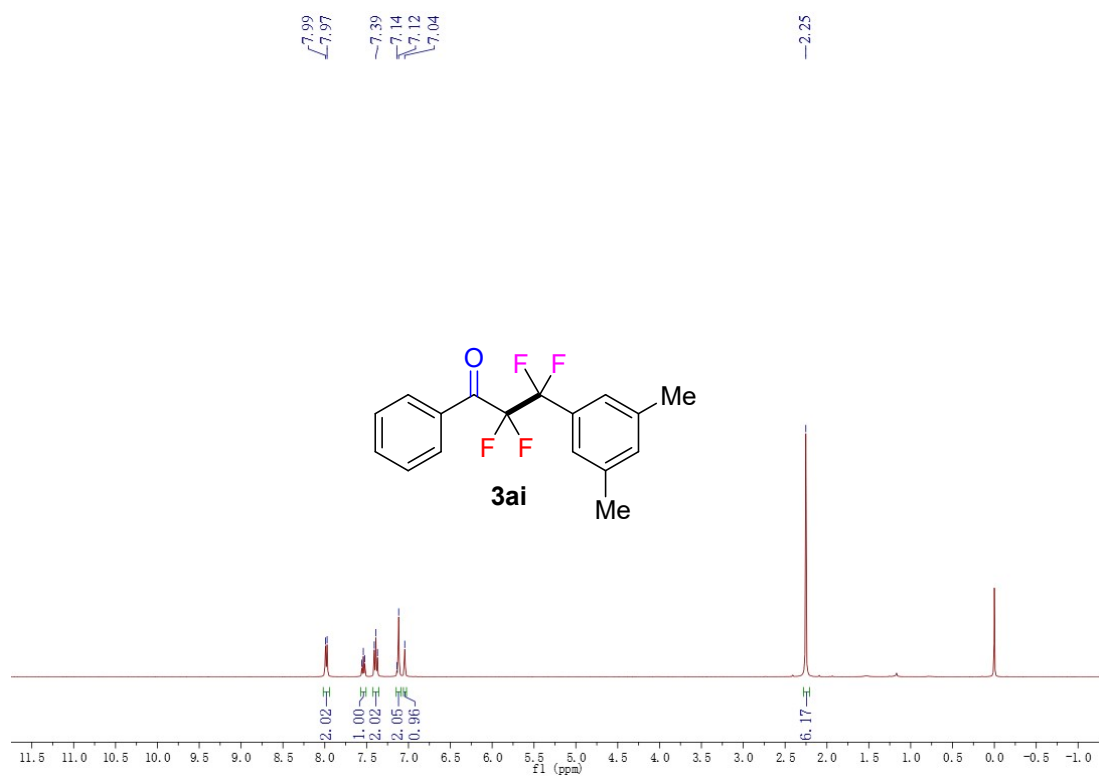

$^{19}\text{F}$  NMR (377 MHz,  $\text{CDCl}_3$ )

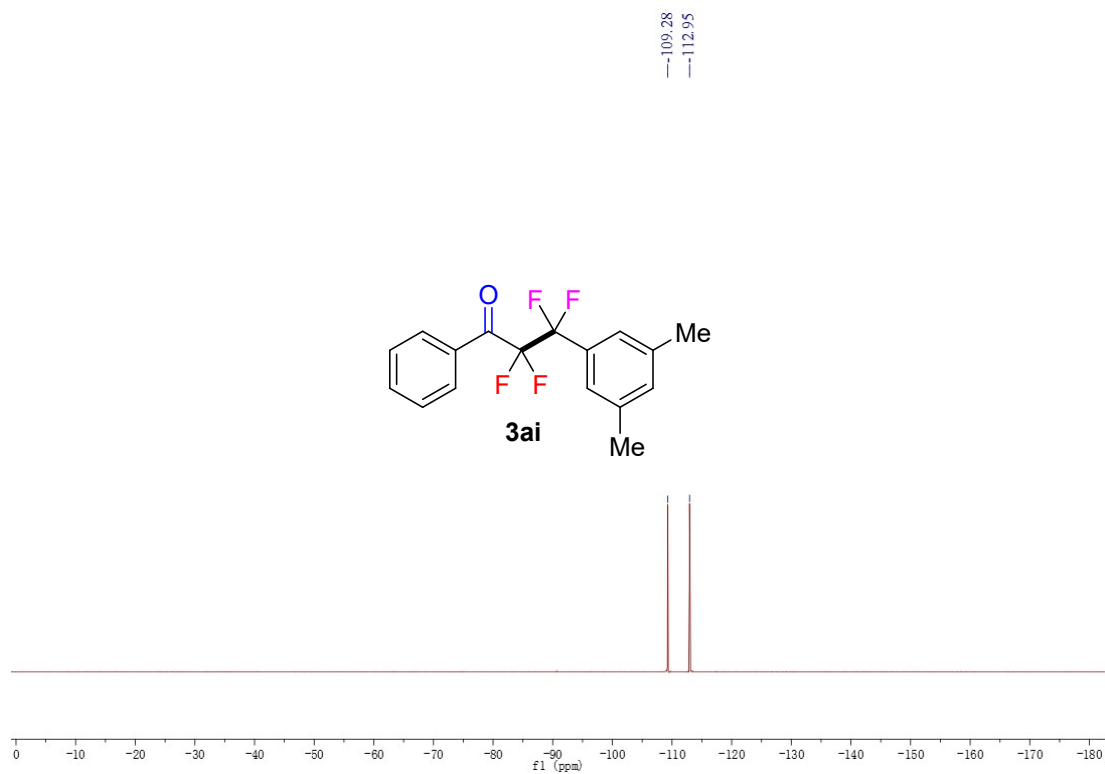

$^{13}\text{C}$  NMR (101 MHz,  $\text{CDCl}_3$ )

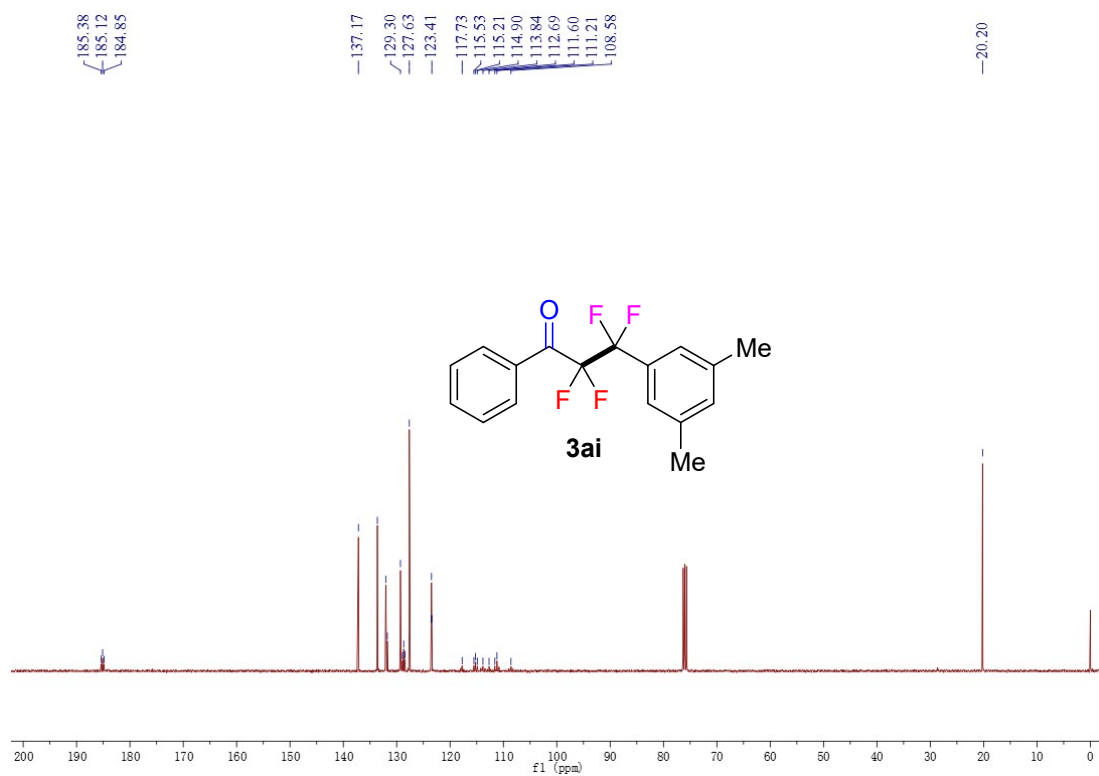

$^1\text{H}$  NMR (400 MHz,  $\text{CDCl}_3$ )

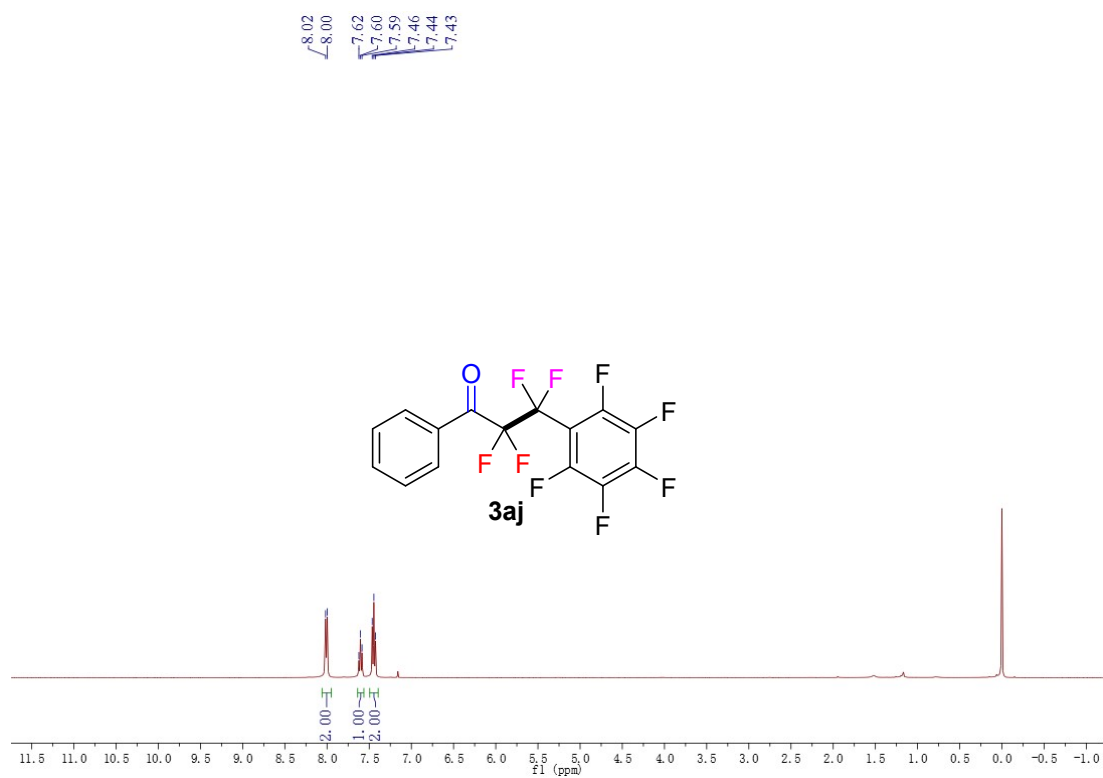

$^{19}\text{F}$  NMR (377 MHz,  $\text{CDCl}_3$ )



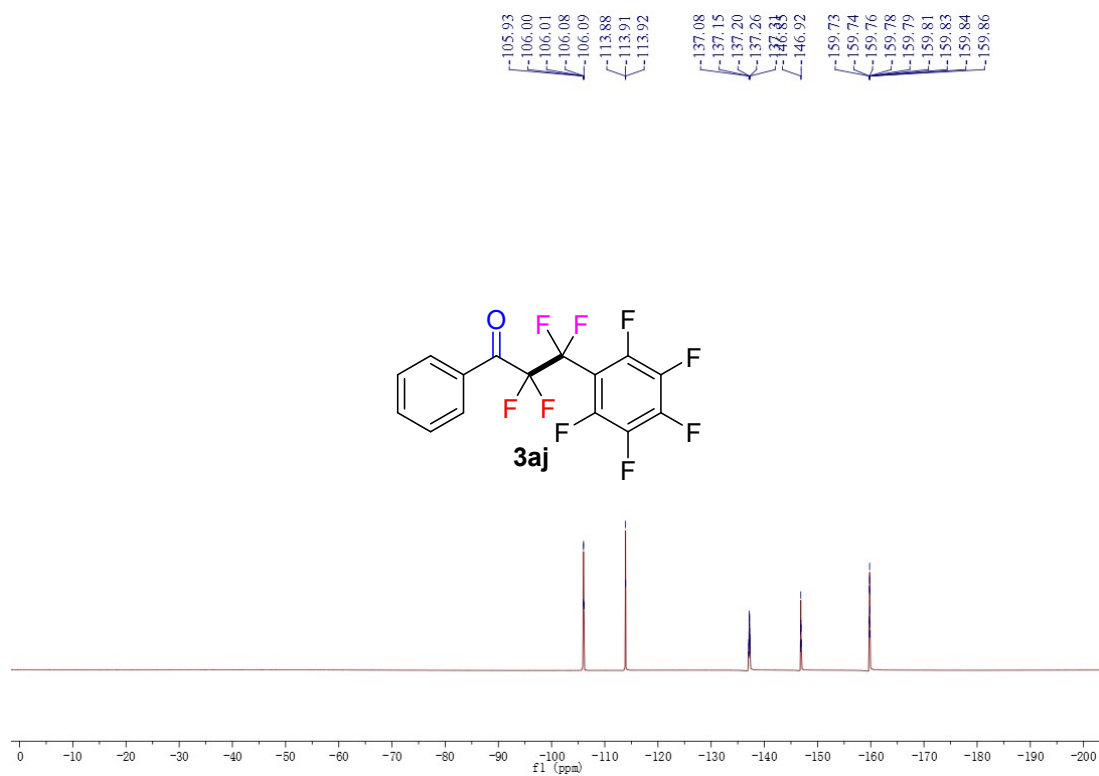

$^{13}\text{C}$  NMR (101 MHz,  $\text{CDCl}_3$ )

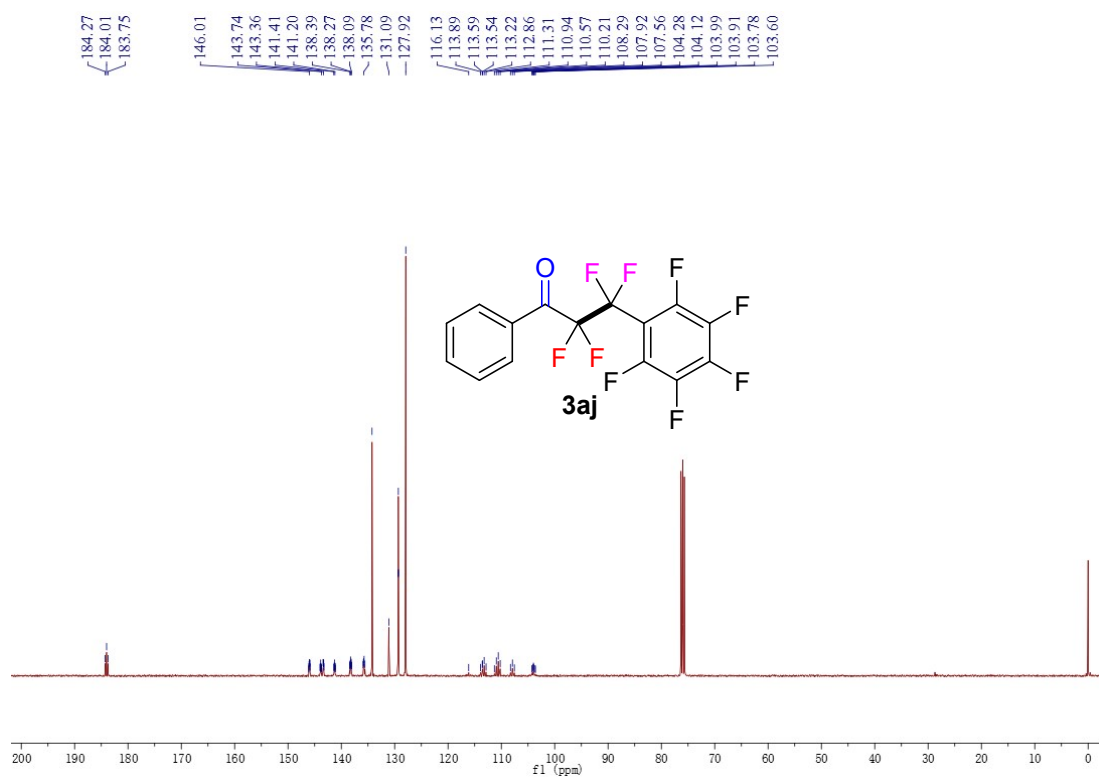

$^1\text{H}$  NMR (400 MHz,  $\text{CDCl}_3$ )

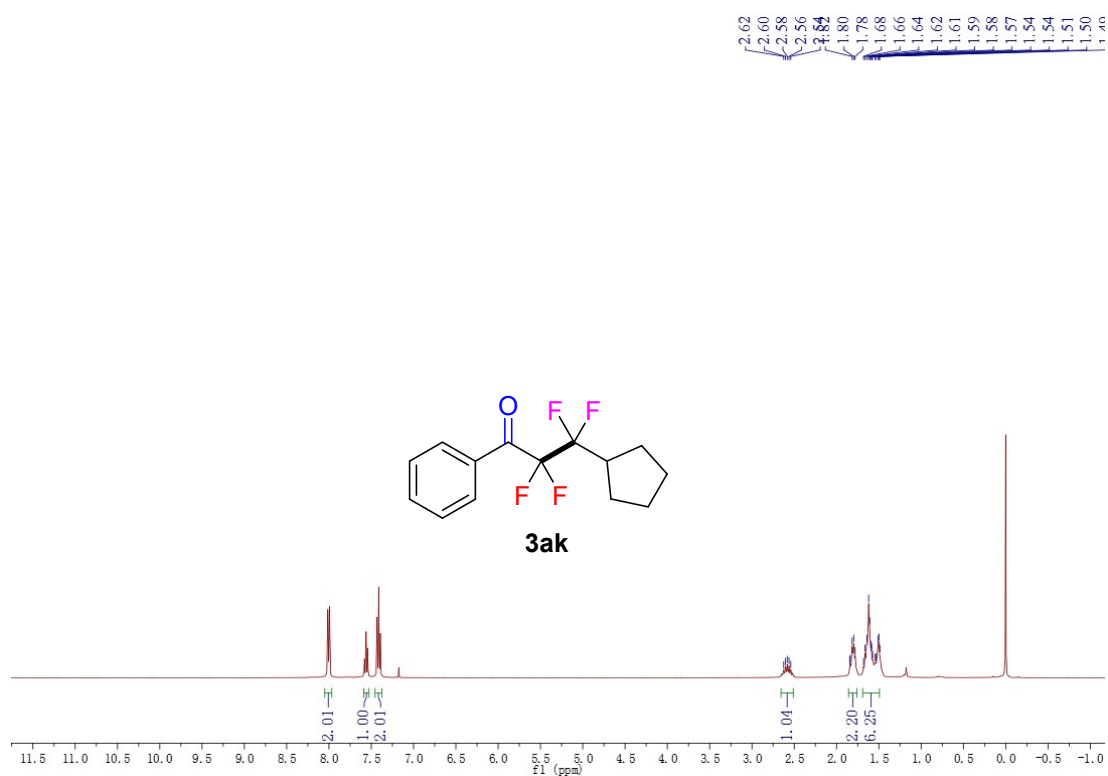

<sup>19</sup>F NMR (377 MHz, CDCl<sub>3</sub>)

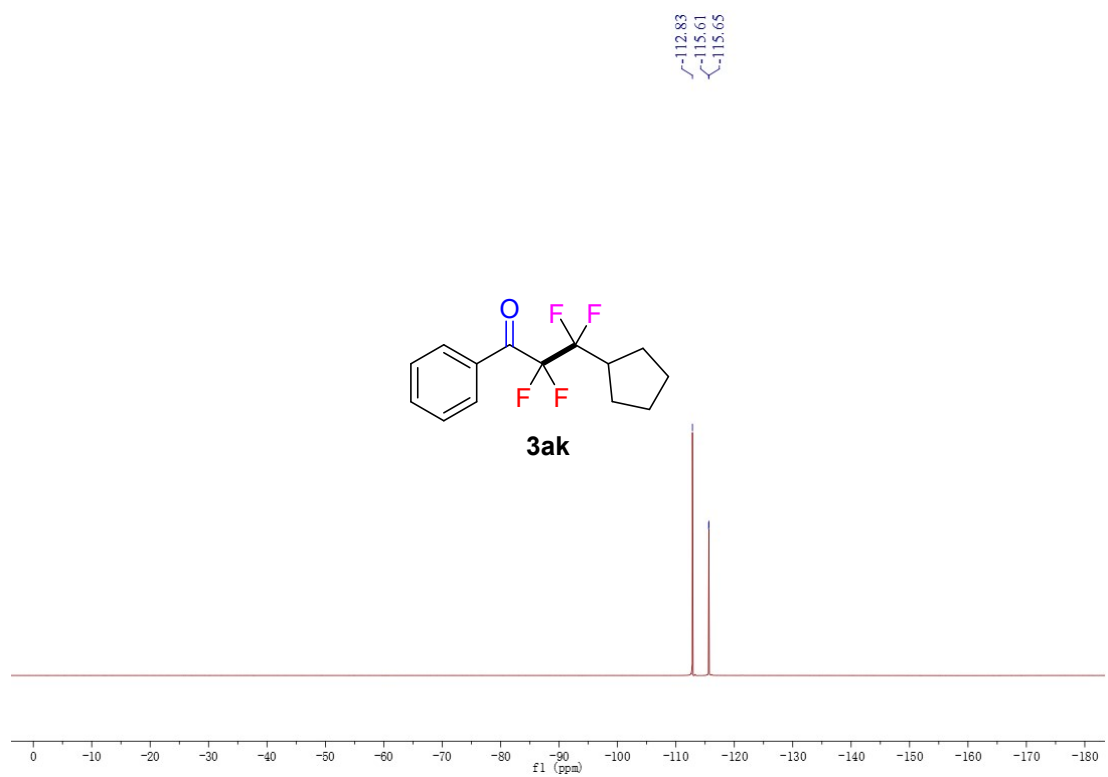

$^{13}\text{C}$  NMR (101 MHz,  $\text{CDCl}_3$ )

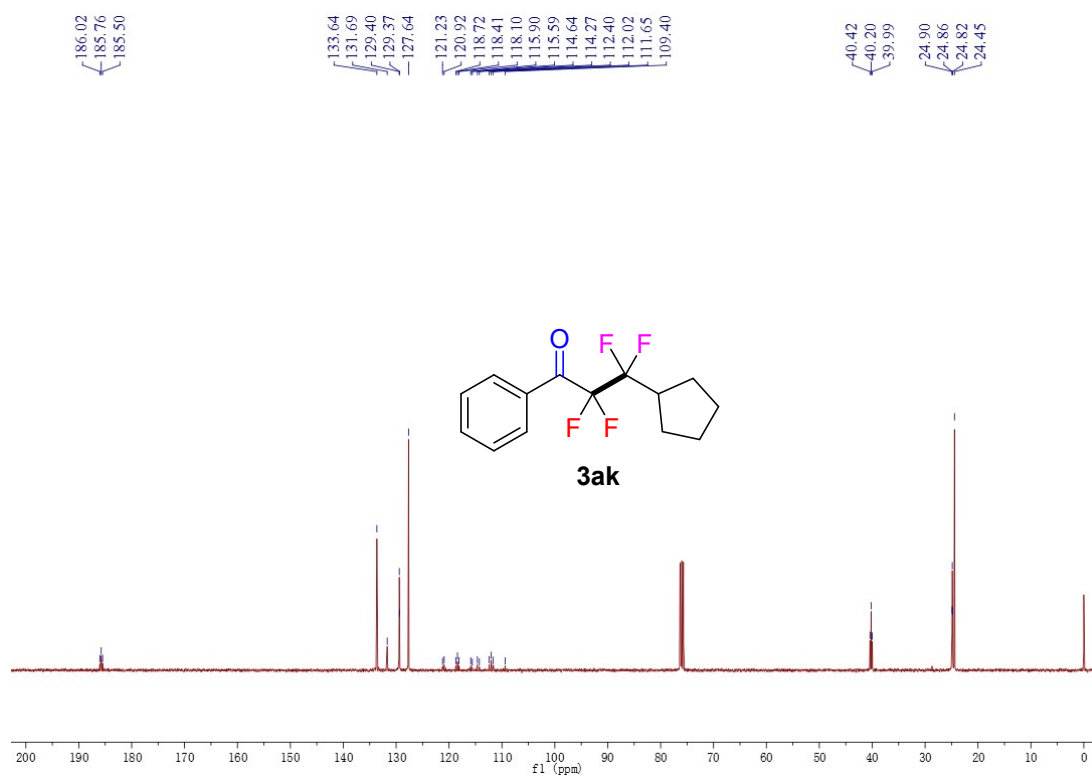

$^1\text{H}$  NMR (400 MHz,  $\text{CDCl}_3$ )

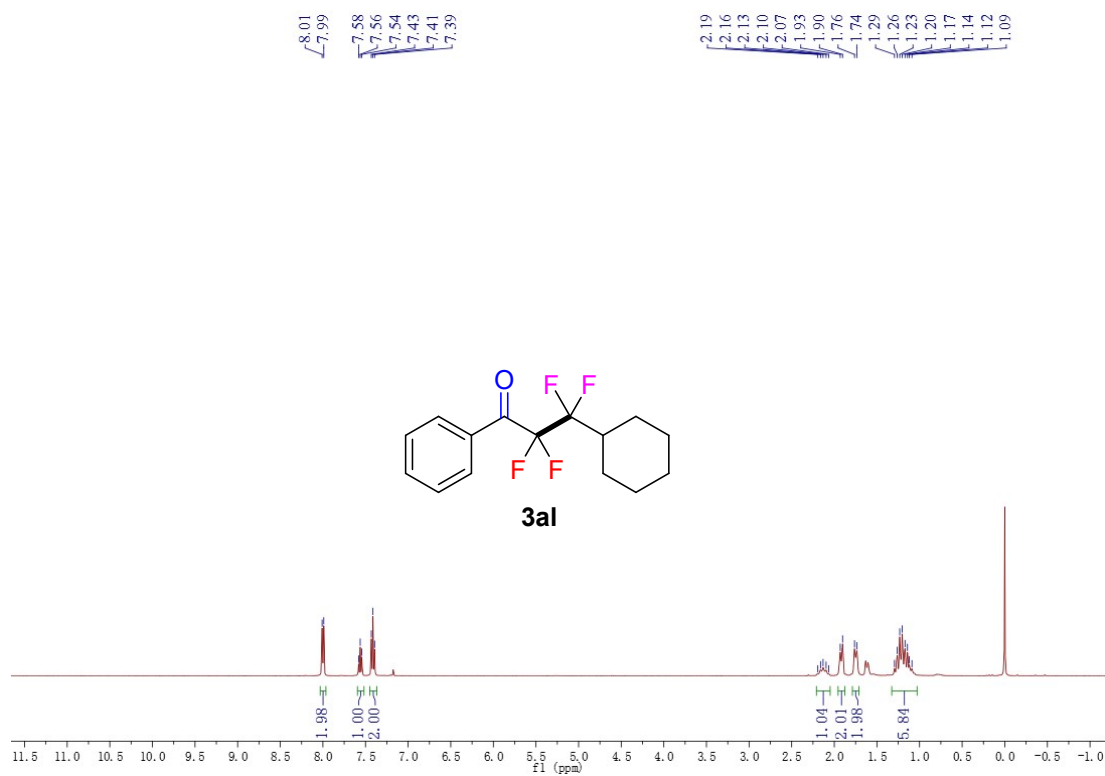

$^{19}\text{F}$  NMR (377 MHz,  $\text{CDCl}_3$ )

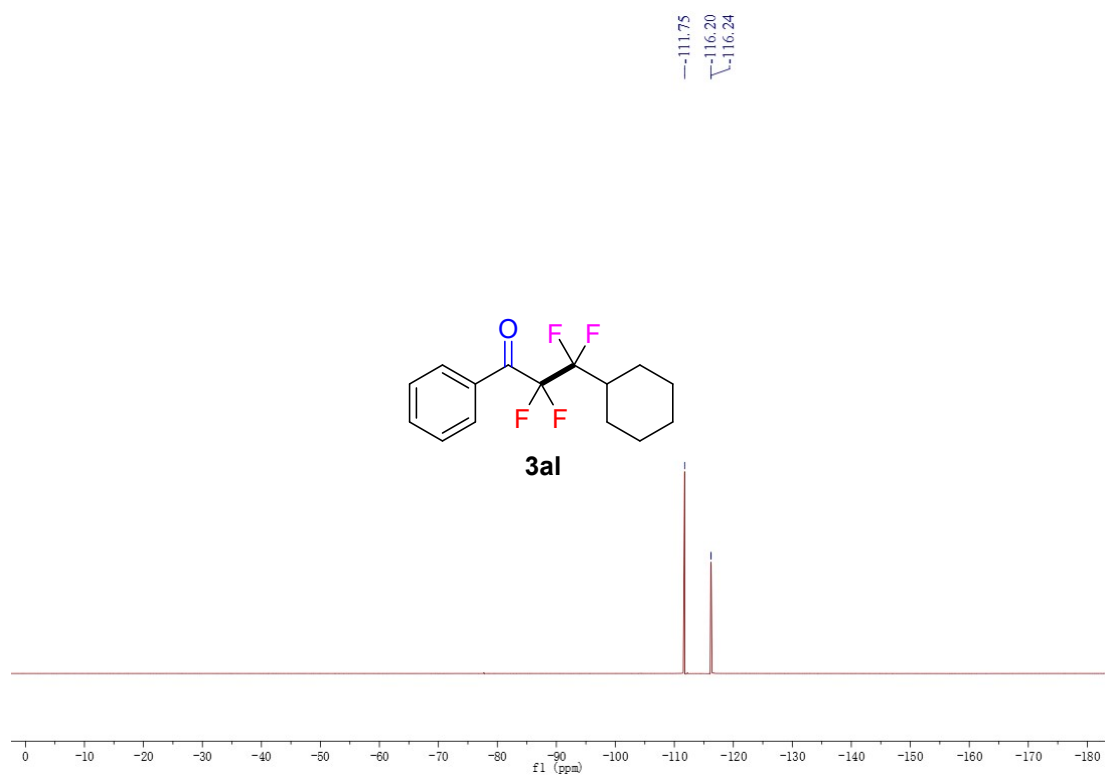

$^{13}\text{C}$  NMR (101 MHz,  $\text{CDCl}_3$ )

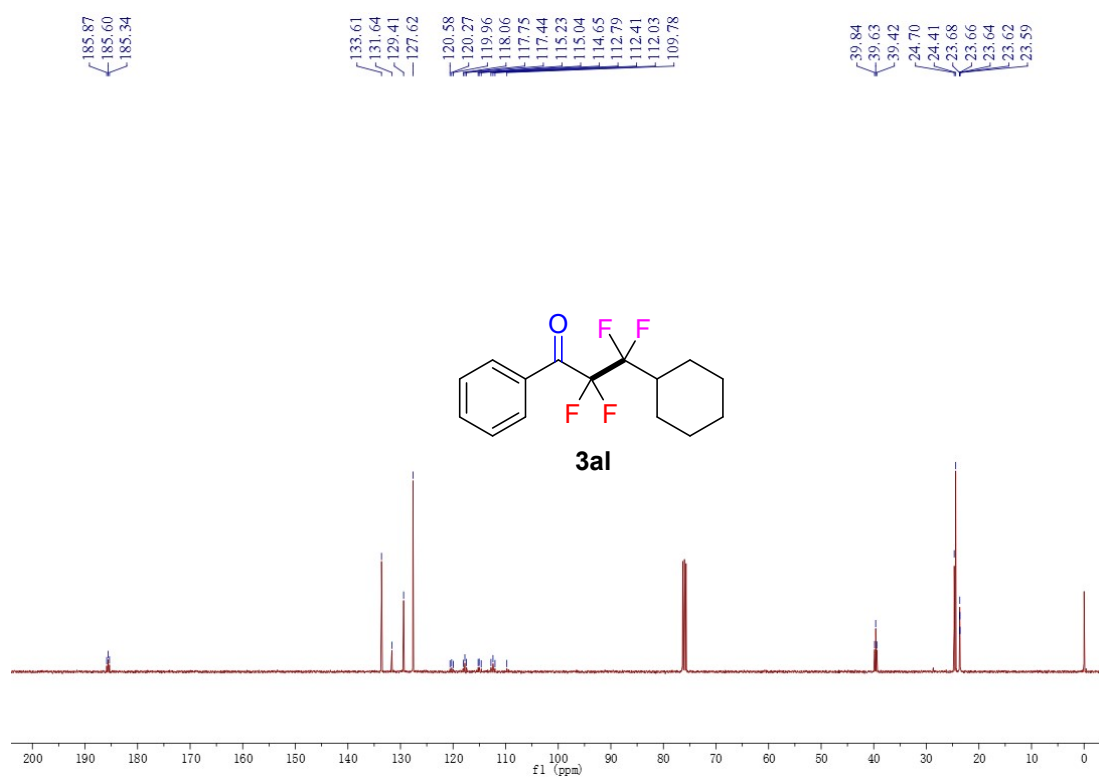

$^1\text{H}$  NMR (400 MHz,  $\text{CDCl}_3$ )

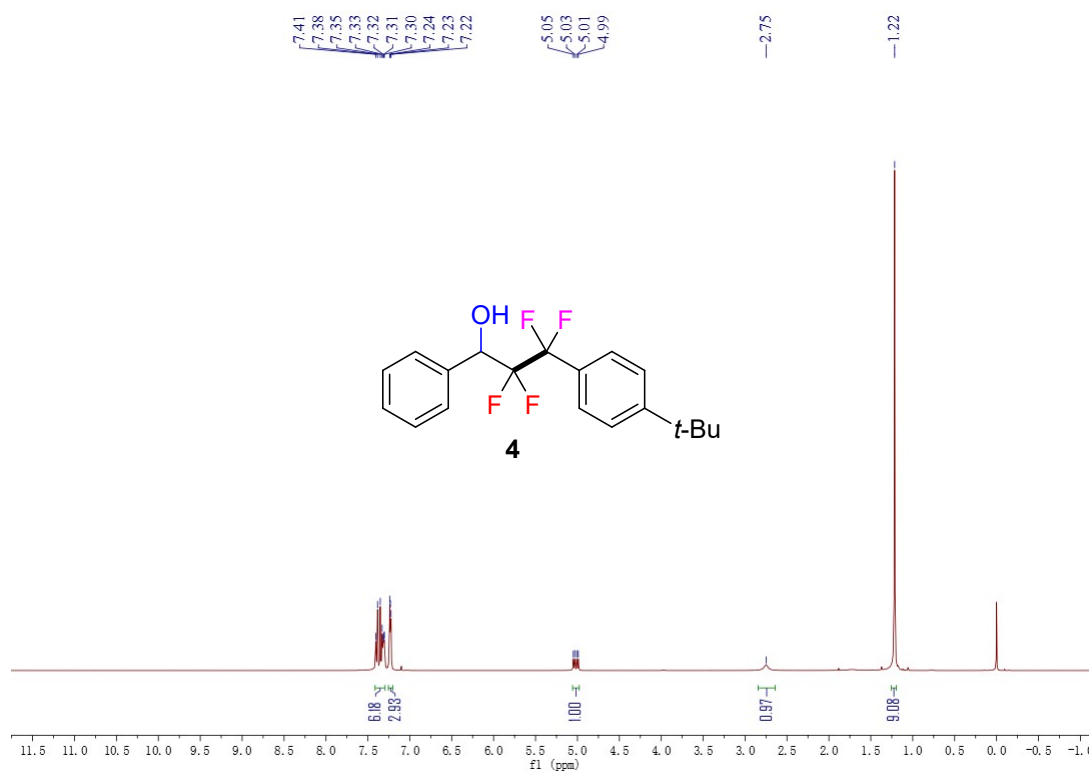

$^{19}\text{F}$  NMR (377 MHz,  $\text{CDCl}_3$ )

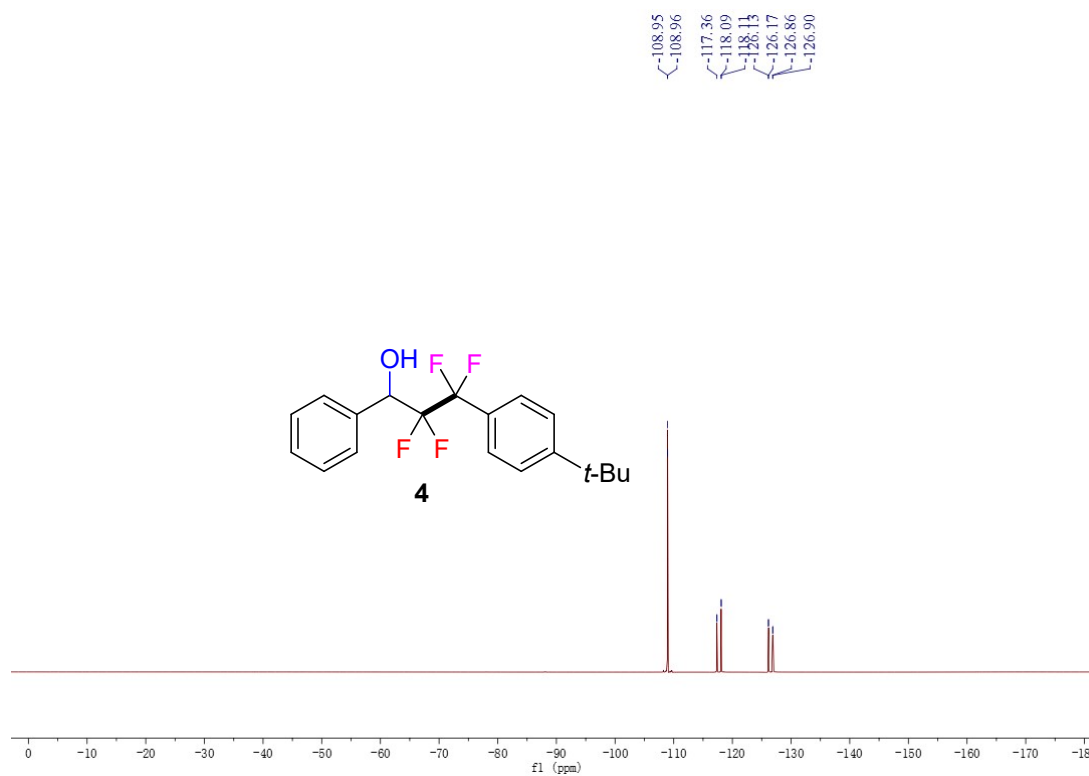

$^{13}\text{C}$  NMR (101 MHz,  $\text{CDCl}_3$ )

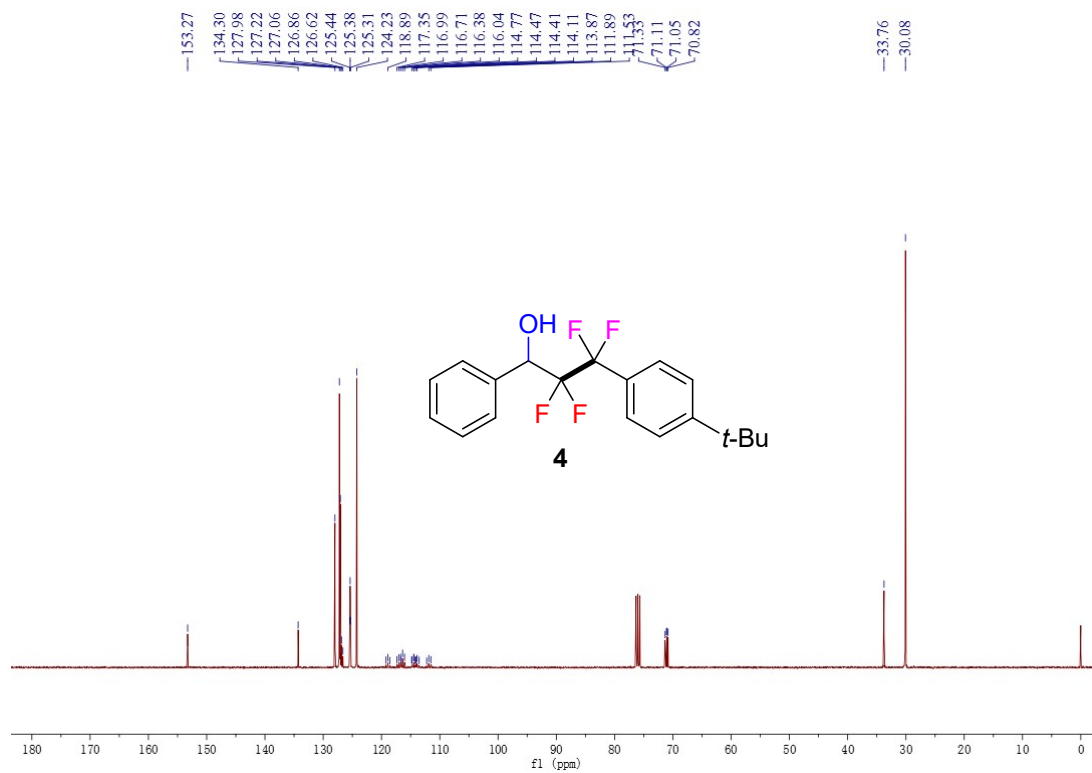

$^1\text{H}$  NMR (400 MHz,  $\text{CDCl}_3$ )

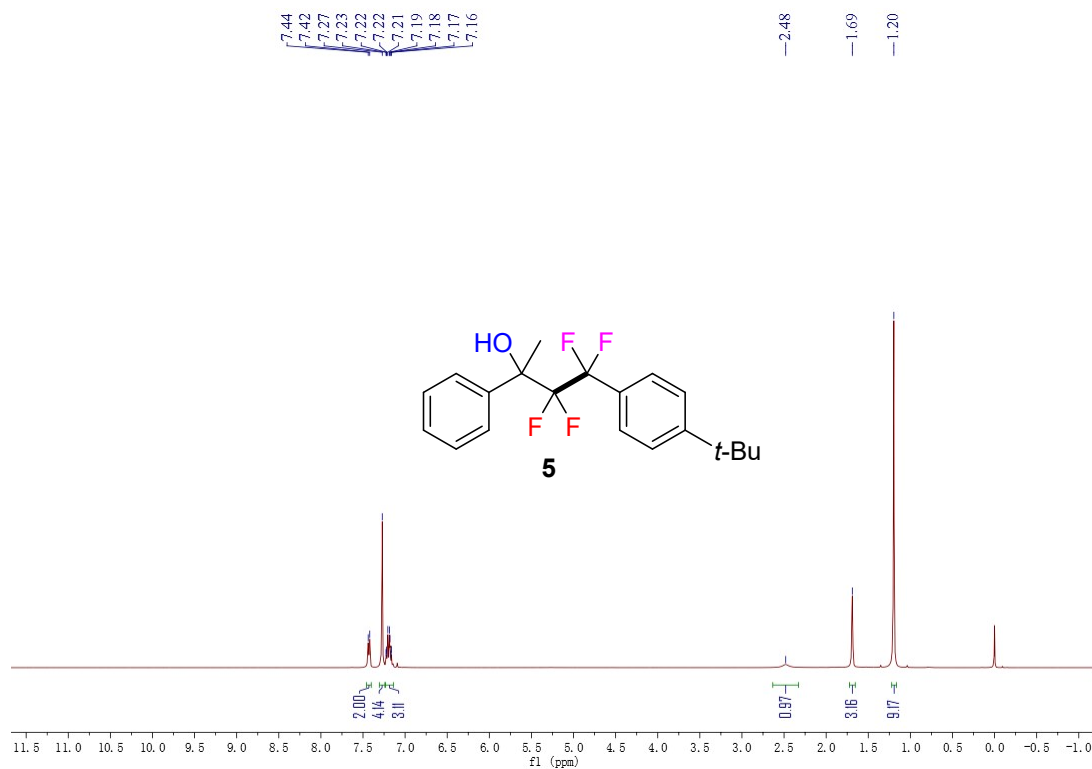

$^{19}\text{F}$  NMR (377 MHz,  $\text{CDCl}_3$ )

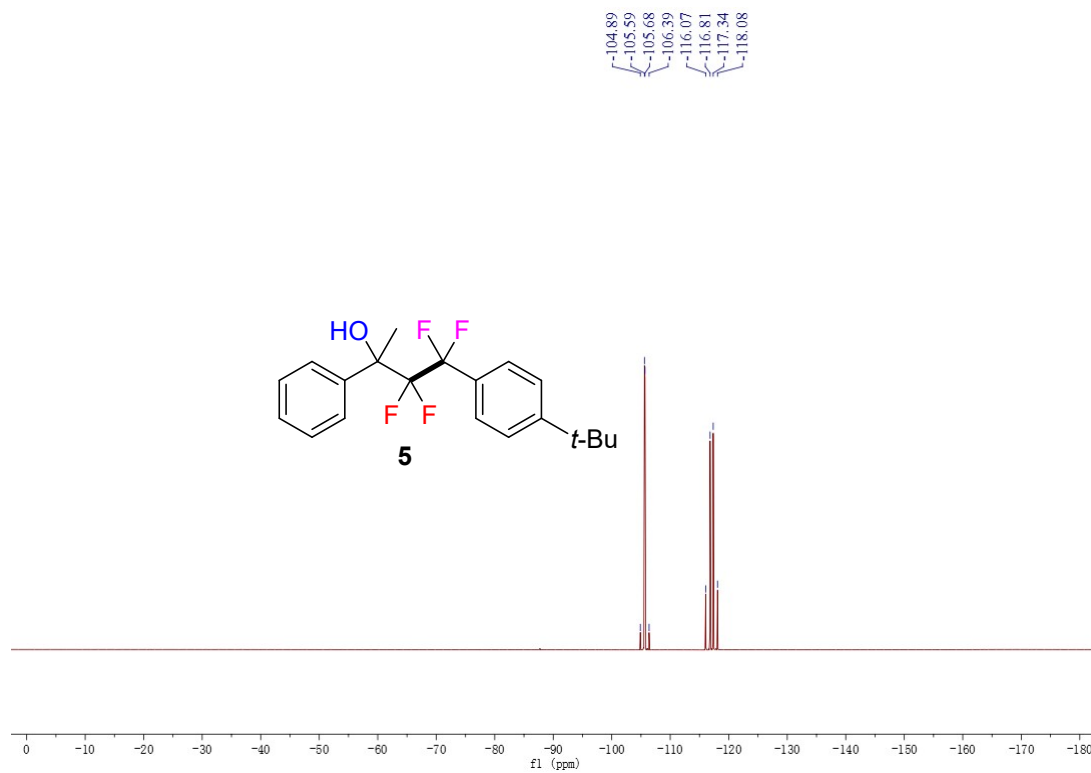

$^{13}\text{C}$  NMR (101 MHz,  $\text{CDCl}_3$ )

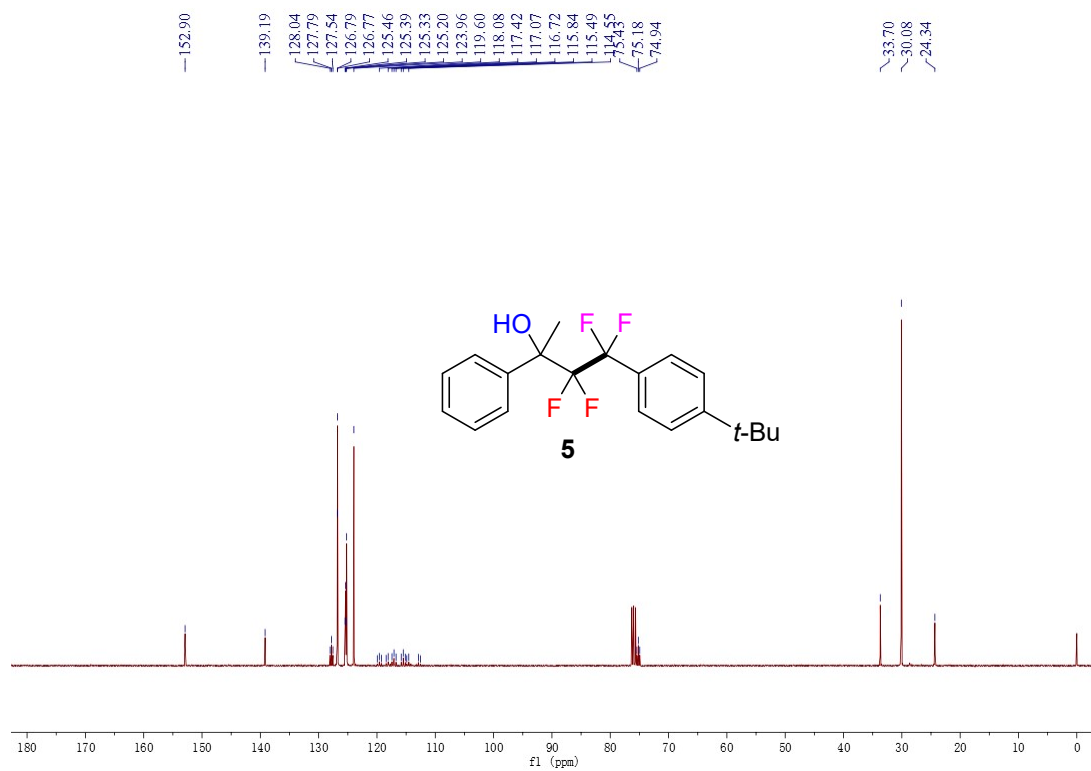

$^1\text{H}$  NMR (400 MHz,  $\text{CDCl}_3$ )

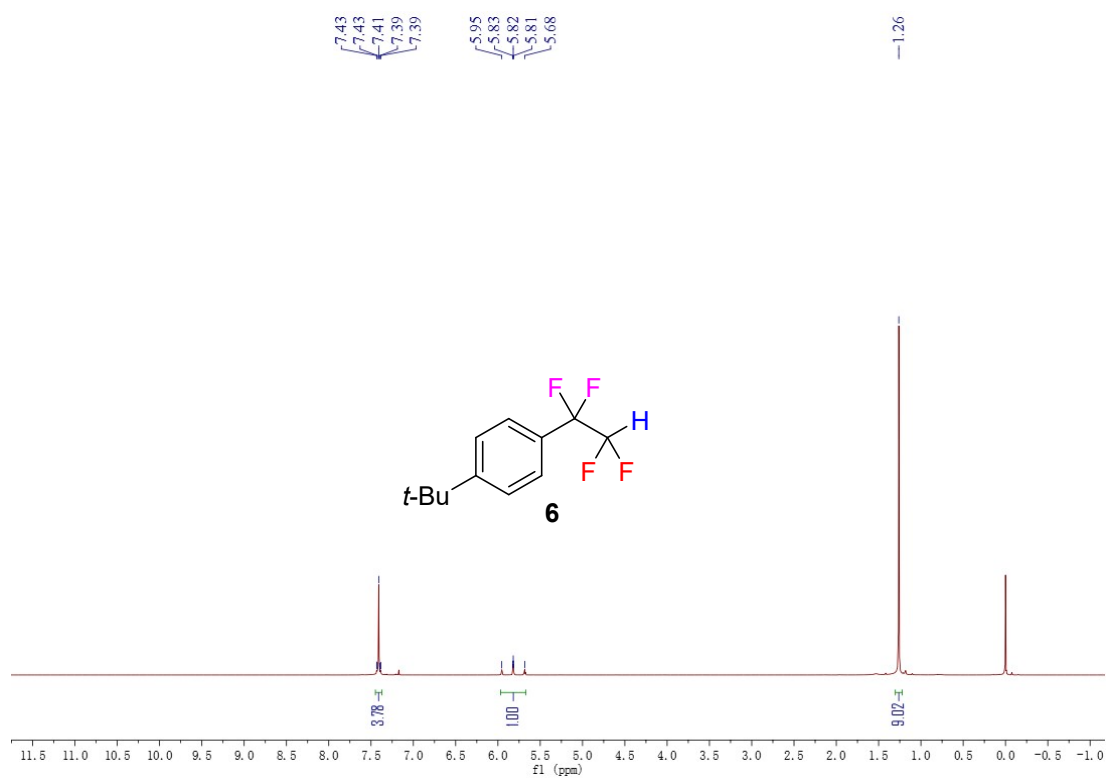

$^{19}\text{F}$  NMR (377 MHz,  $\text{CDCl}_3$ )

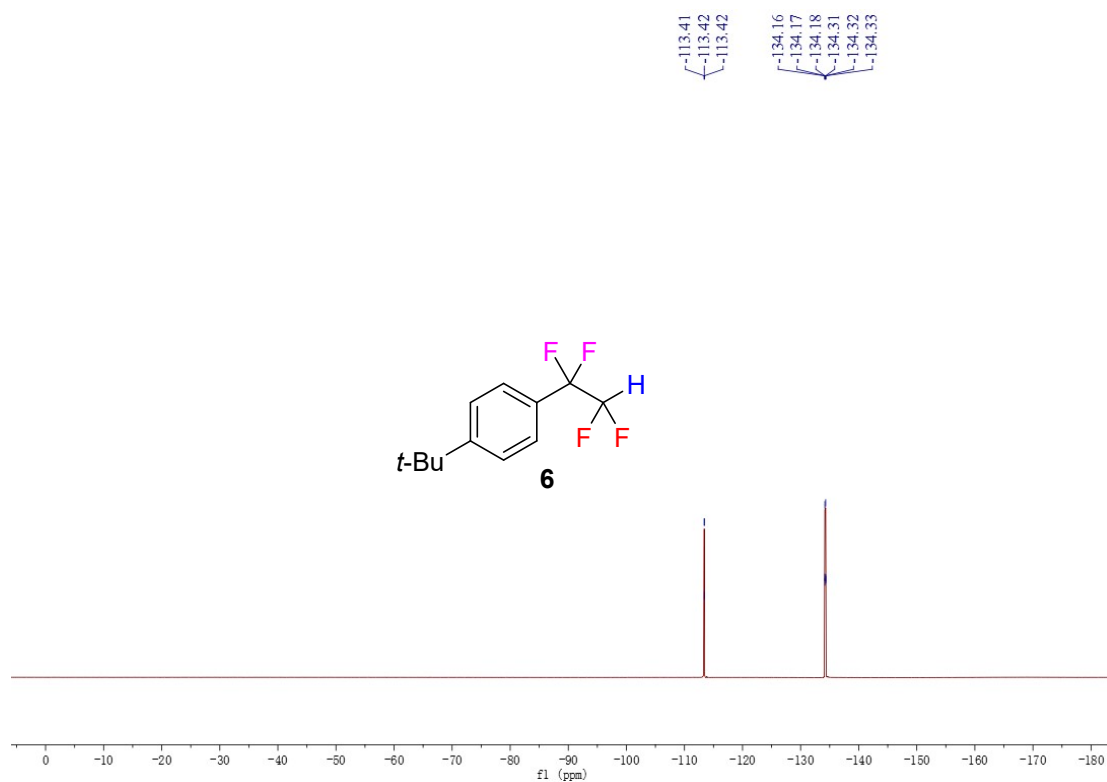

$^{13}\text{C}$  NMR (101 MHz,  $\text{CDCl}_3$ )



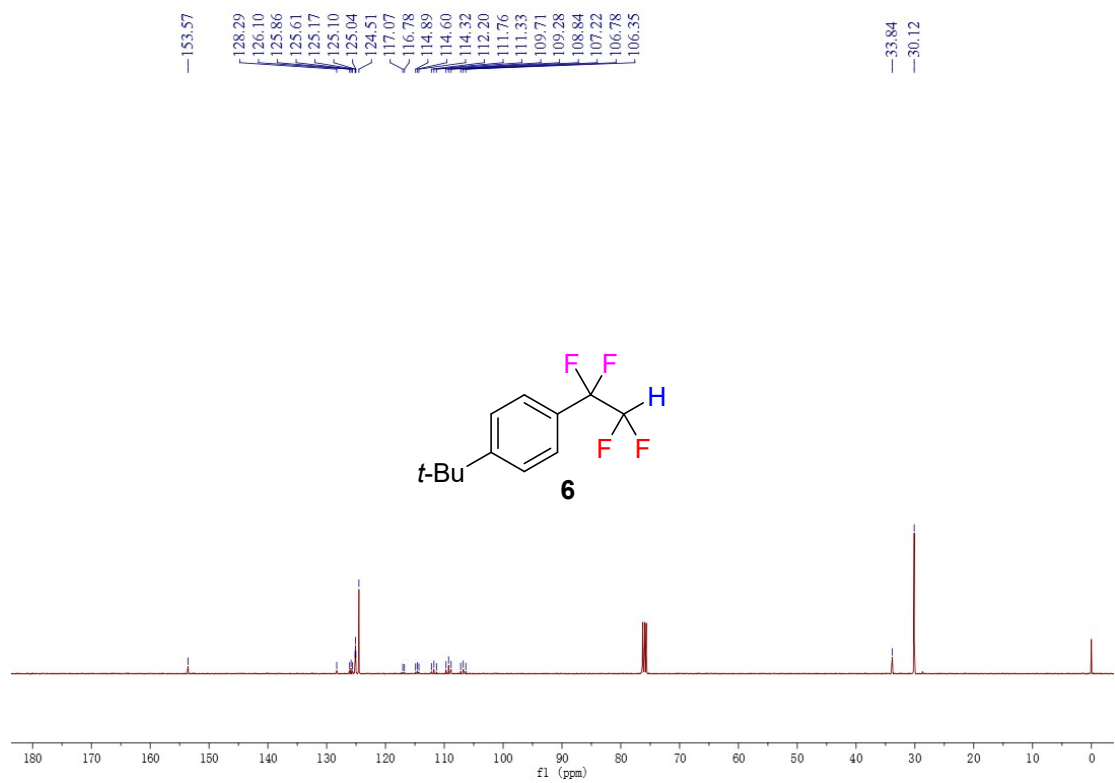

$^1\text{H}$  NMR (400 MHz,  $\text{CDCl}_3$ )

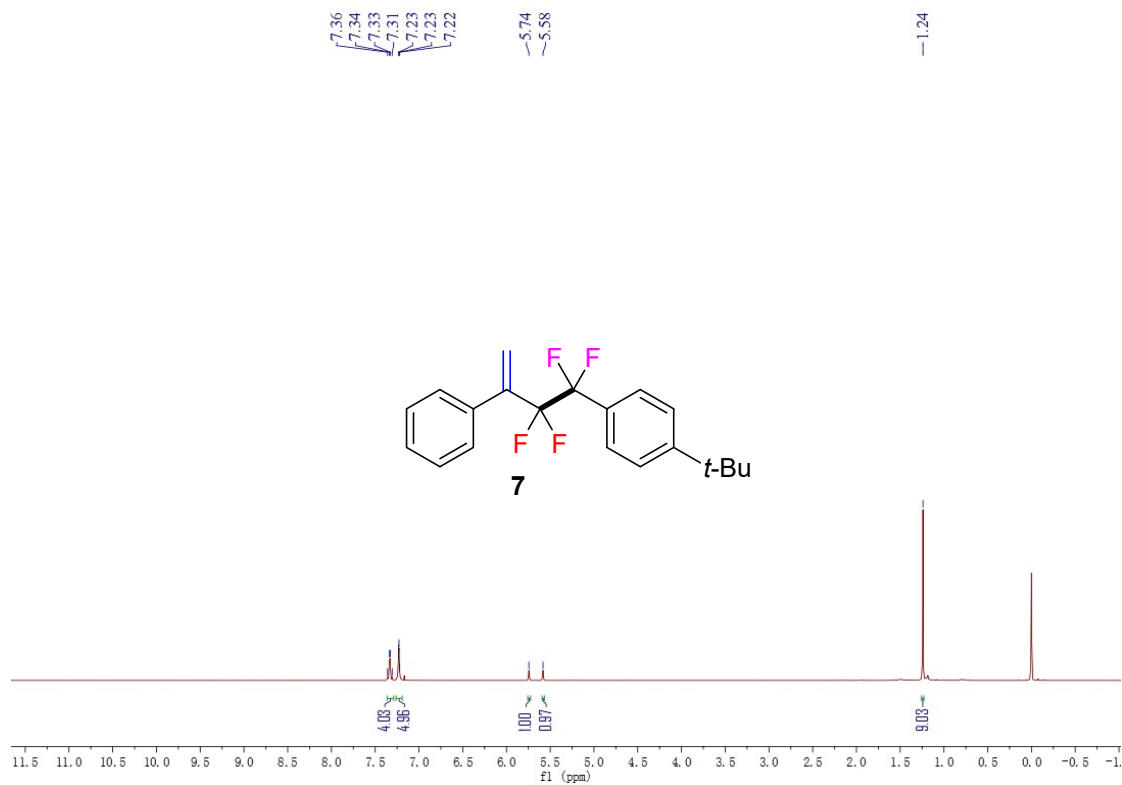

$^{19}\text{F}$  NMR (377 MHz,  $\text{CDCl}_3$ )

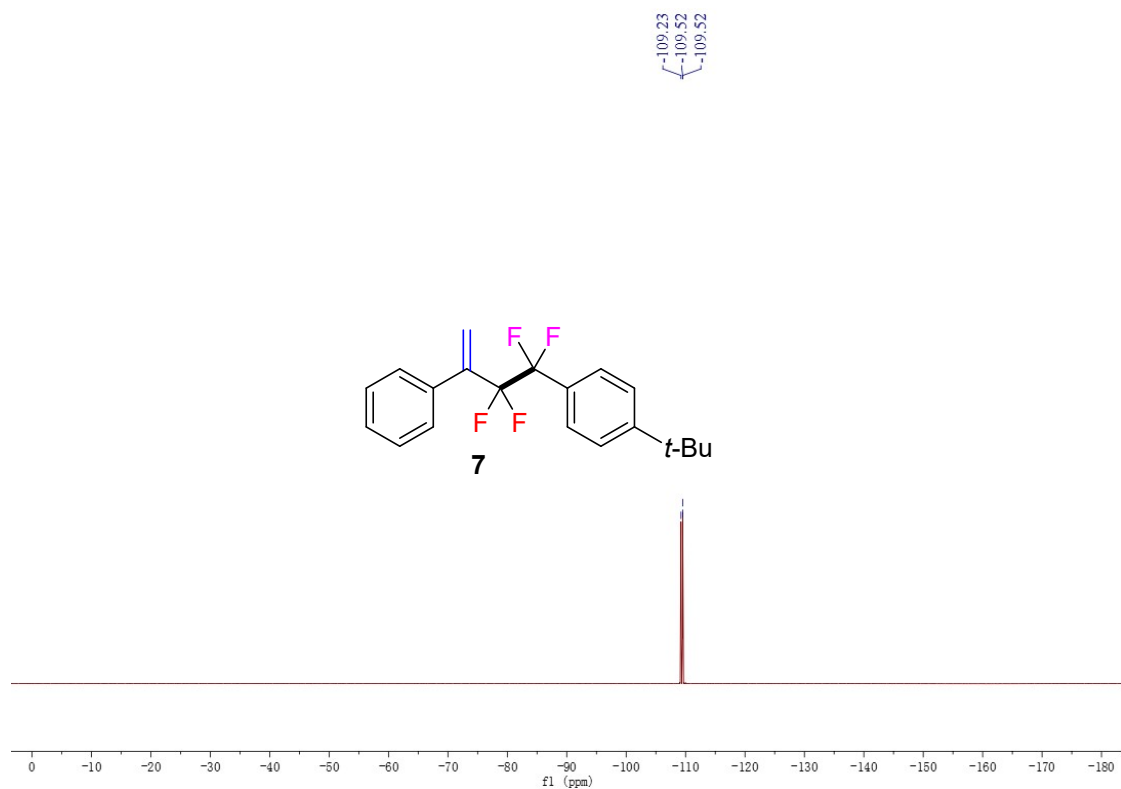

$^{13}\text{C}$  NMR (101 MHz,  $\text{CDCl}_3$ )

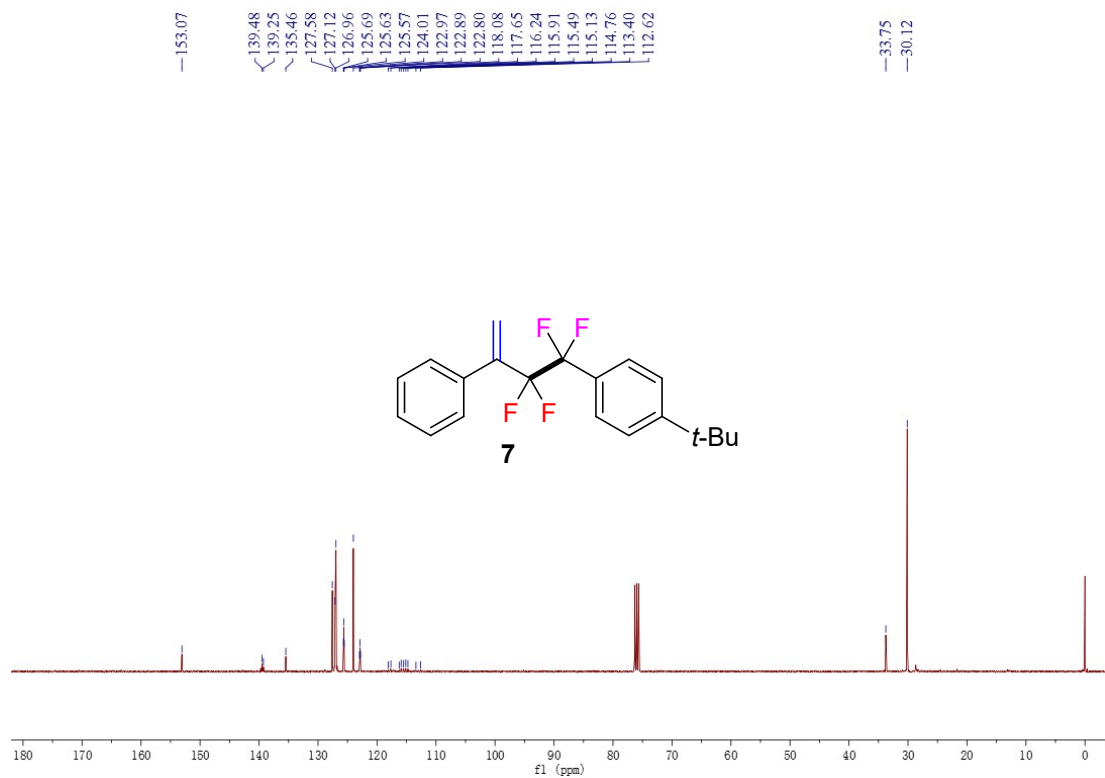

$^1\text{H}$  NMR (400 MHz,  $\text{CDCl}_3$ )

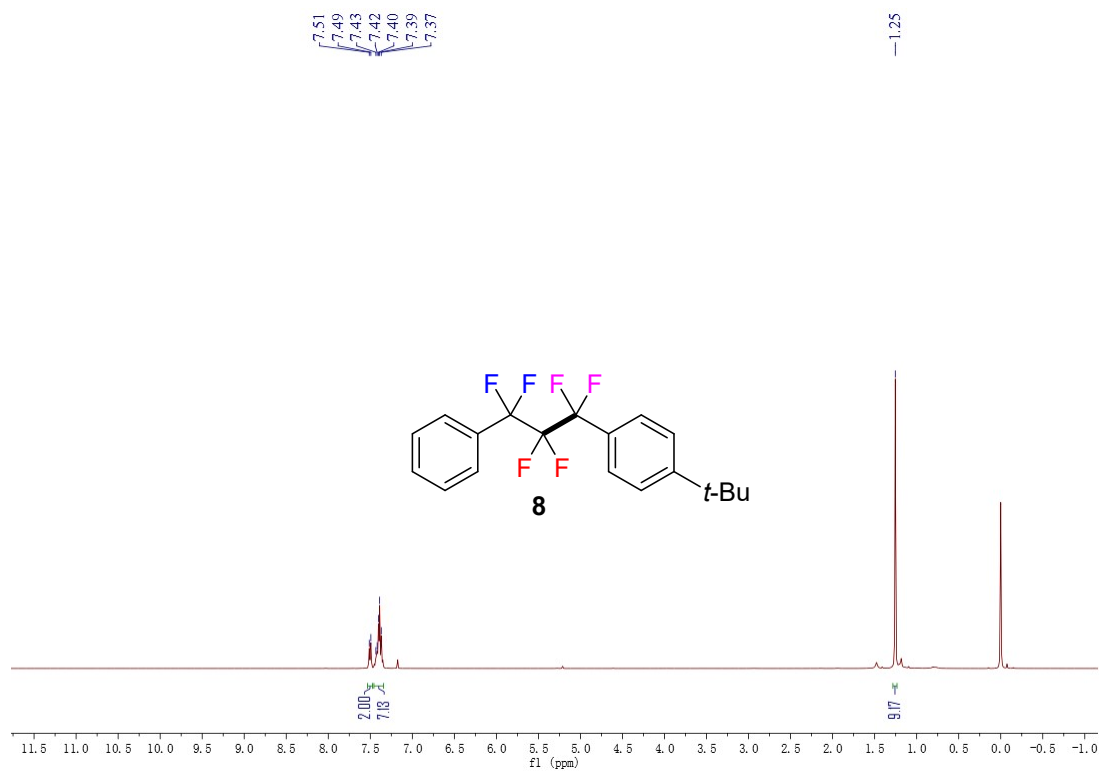

$^{19}\text{F}$  NMR (377 MHz,  $\text{CDCl}_3$ )

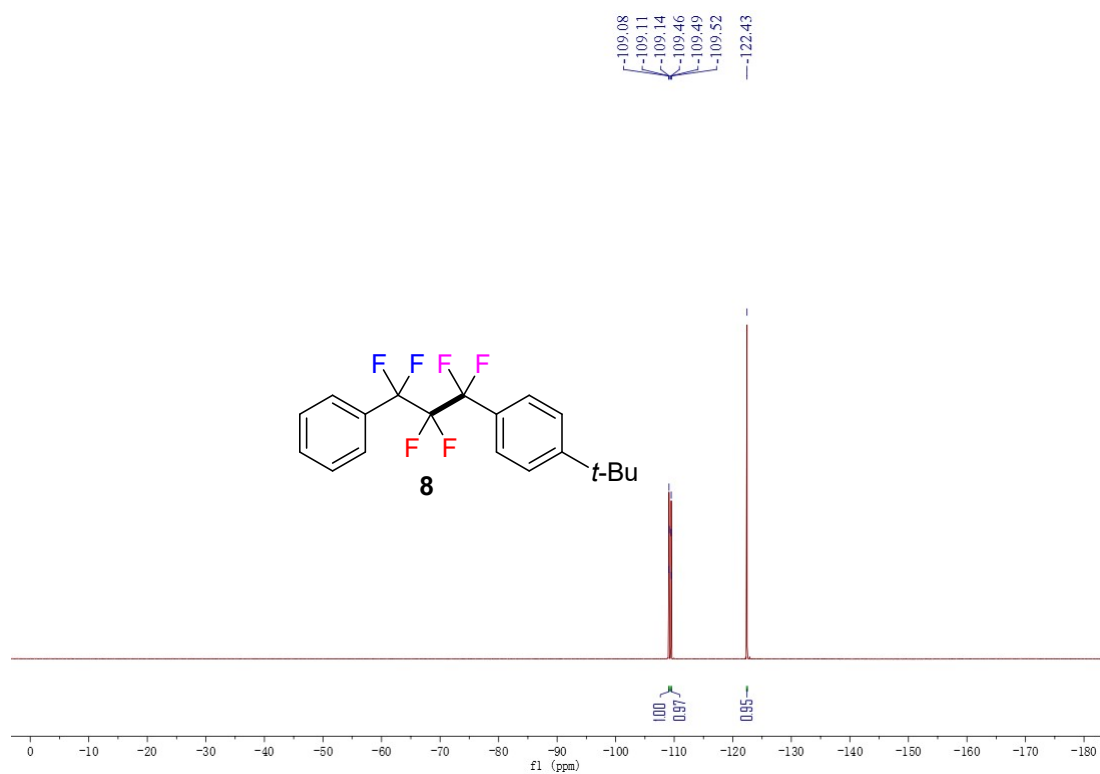

$^{13}\text{C}$  NMR (101 MHz,  $\text{CDCl}_3$ )

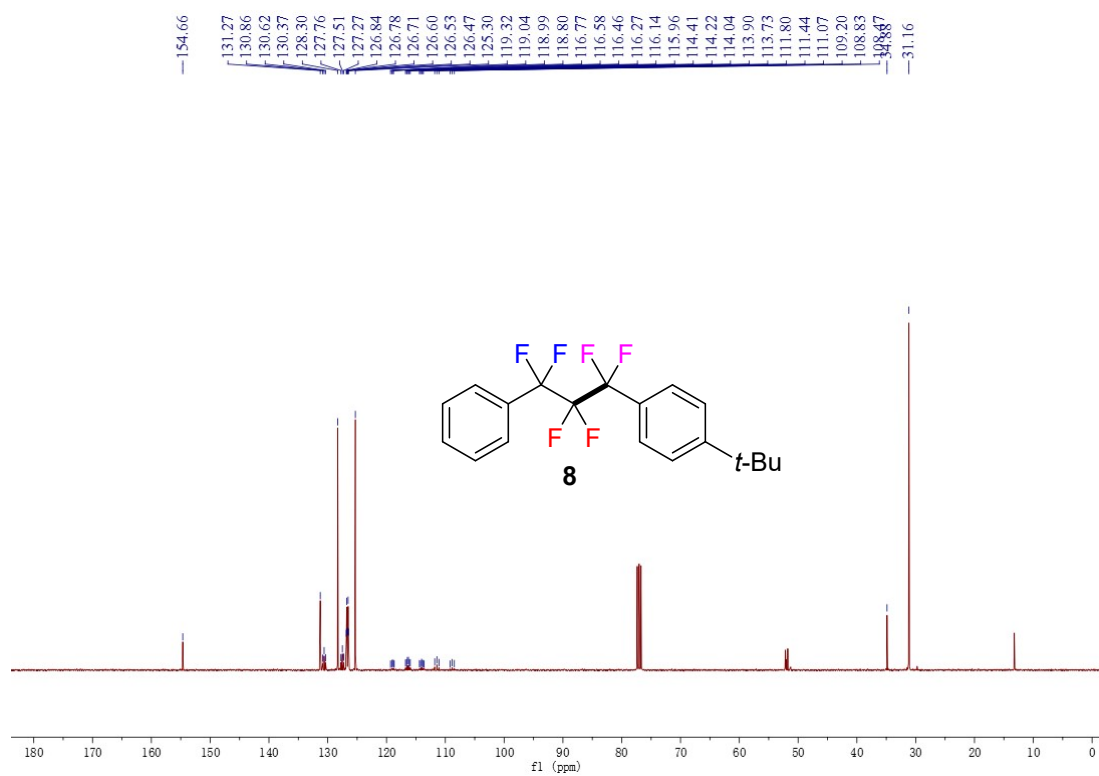

$^1\text{H}$  NMR (400 MHz,  $\text{CDCl}_3$ )

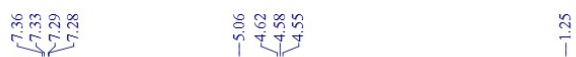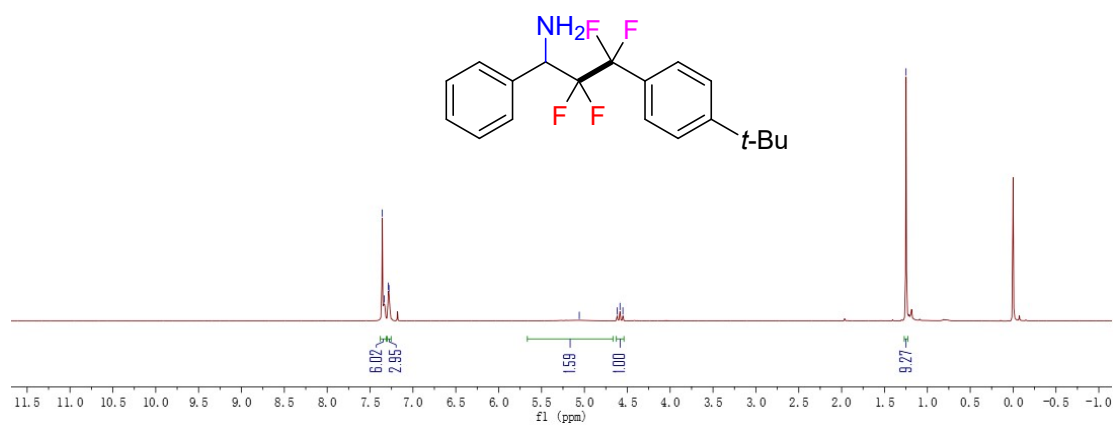

$^{19}\text{F}$  NMR (377 MHz,  $\text{CDCl}_3$ )

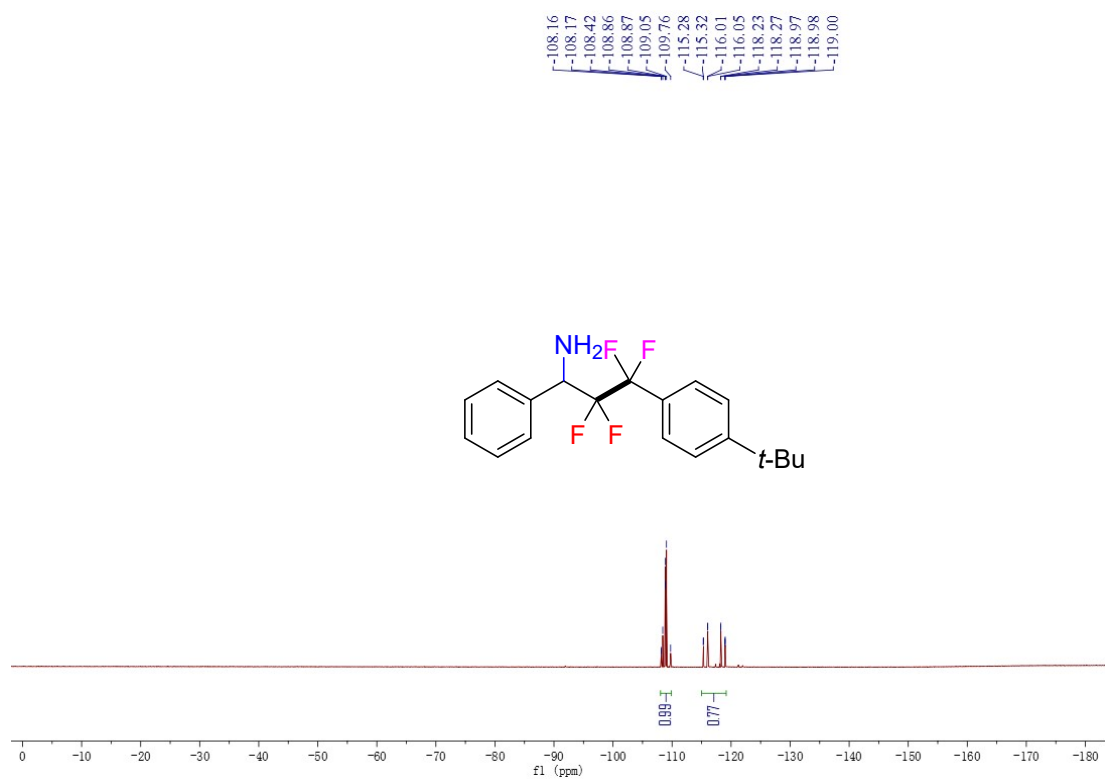

<sup>13</sup>C NMR (101 MHz, CDCl<sub>3</sub>)

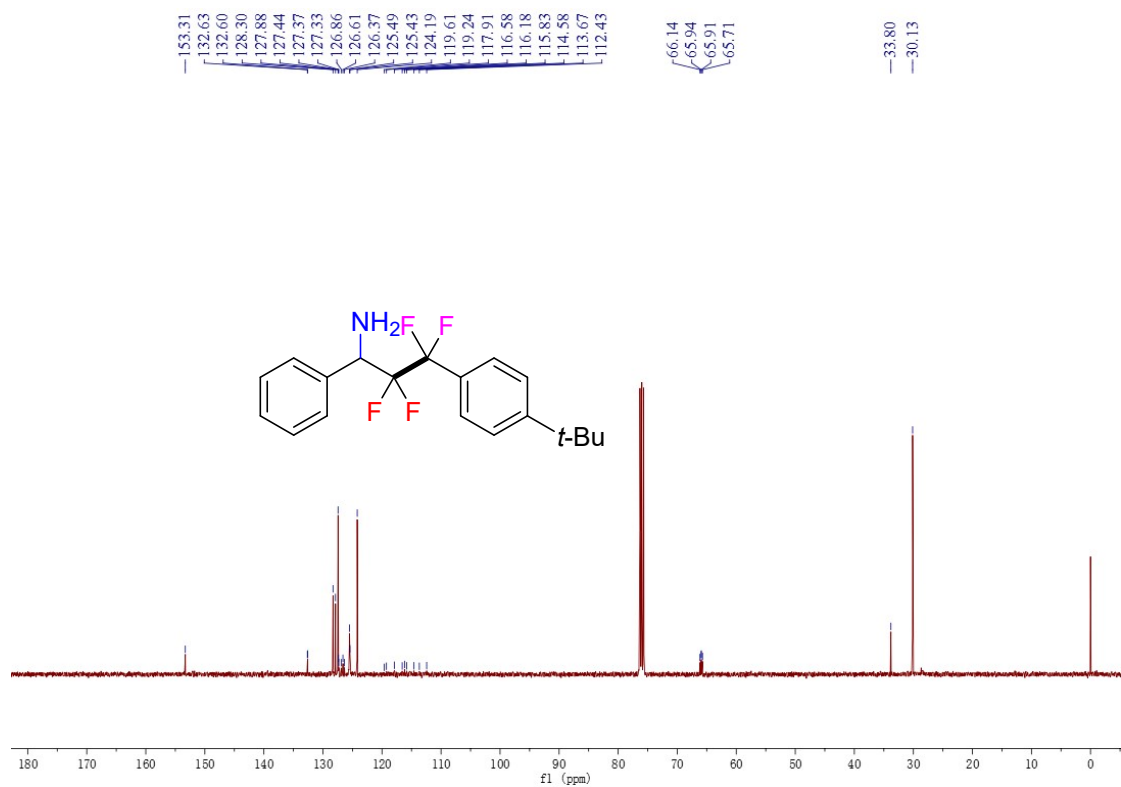

<sup>1</sup>H NMR (400 MHz, CDCl<sub>3</sub>)

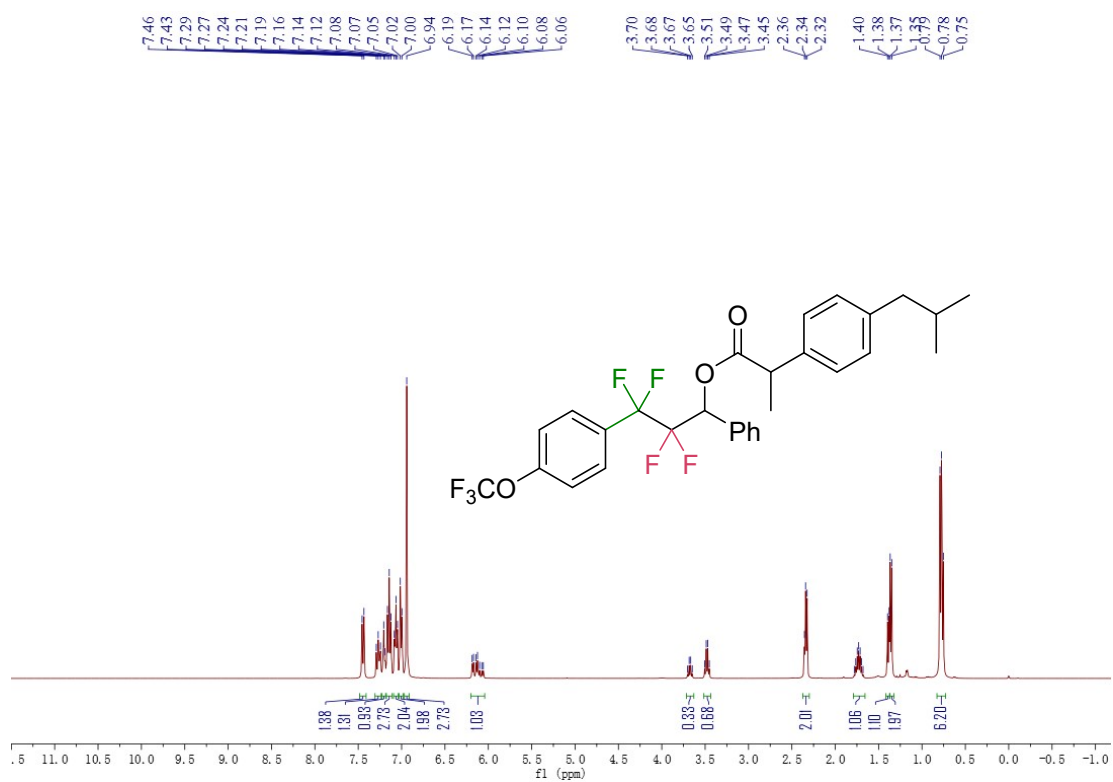

$^{19}\text{F}$  NMR (377 MHz,  $\text{CDCl}_3$ )

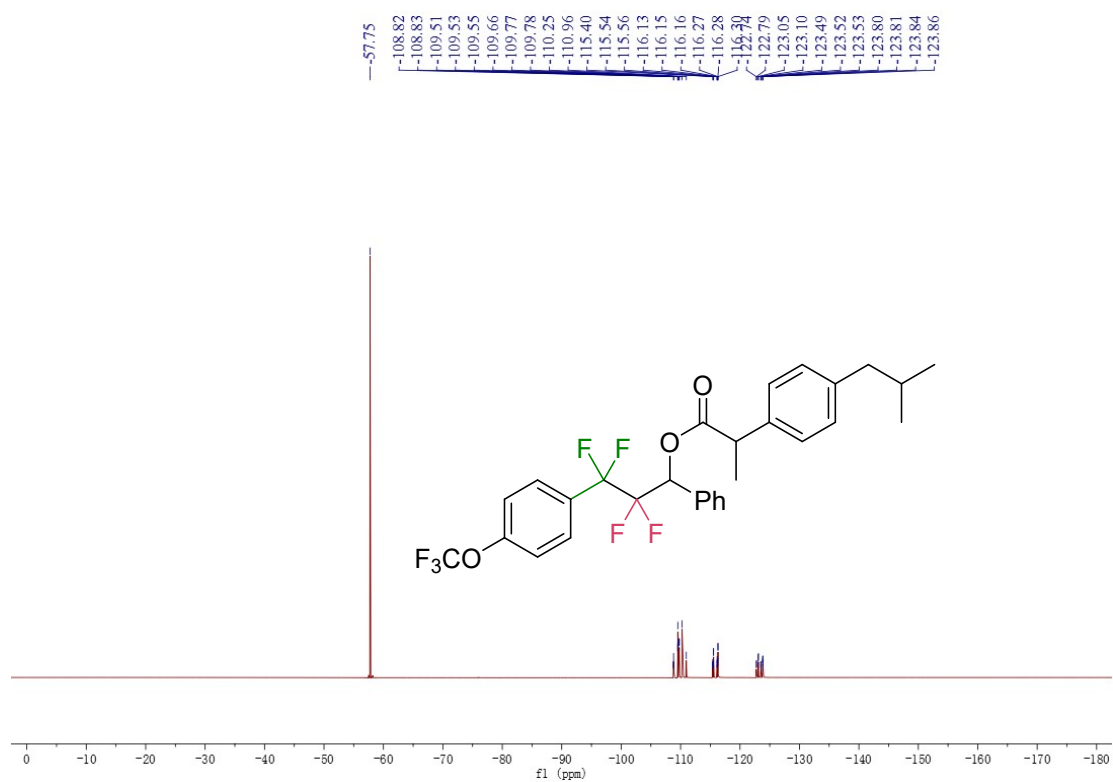

$^{13}\text{C}$  NMR (101 MHz,  $\text{CDCl}_3$ )

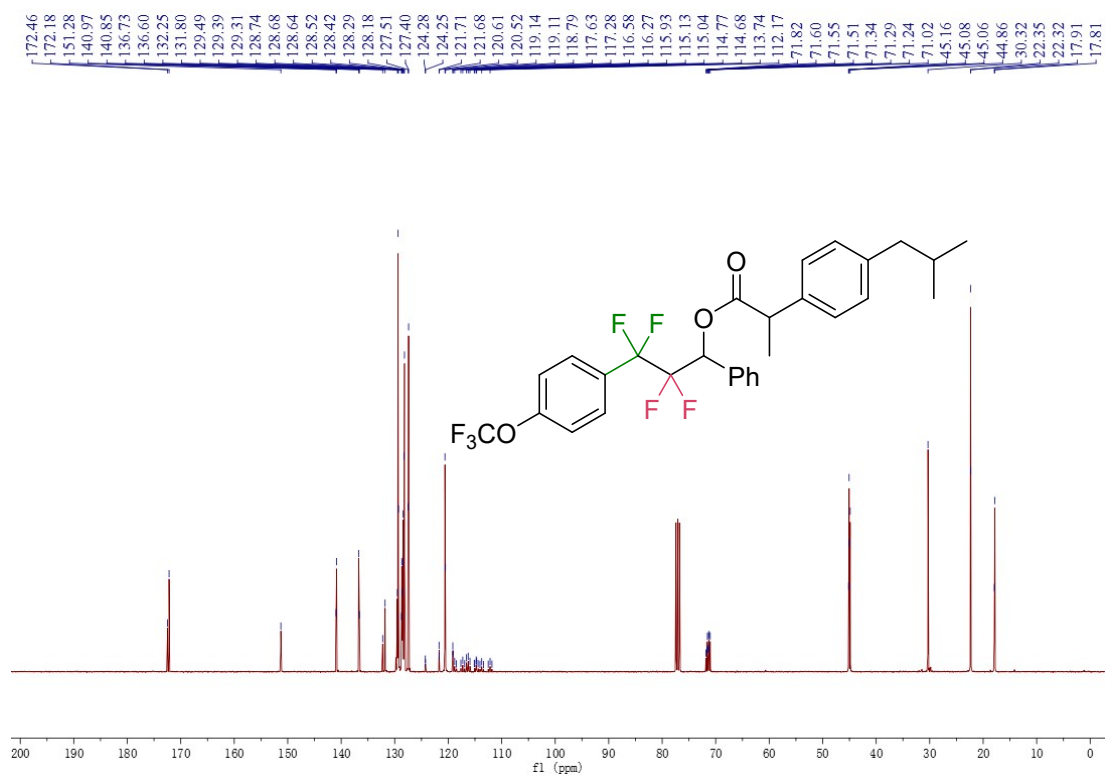

<sup>1</sup>H NMR (400 MHz, CDCl<sub>3</sub>)

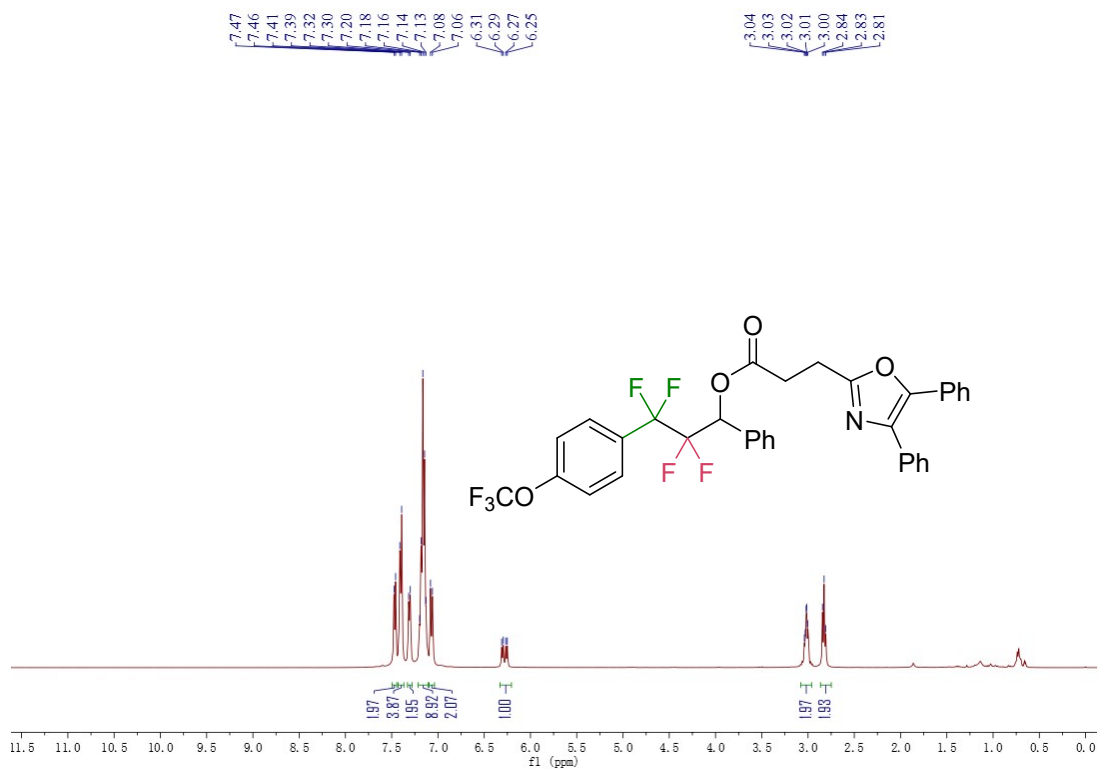

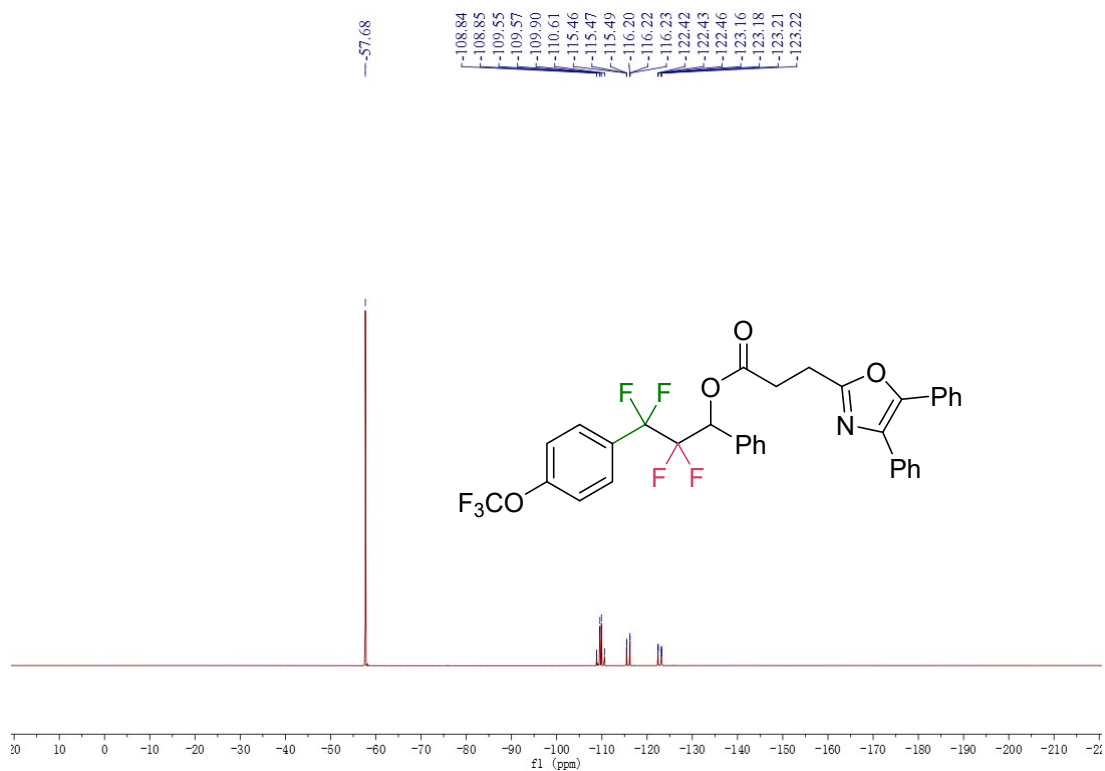

<sup>13</sup>C NMR (101 MHz, CDCl<sub>3</sub>)

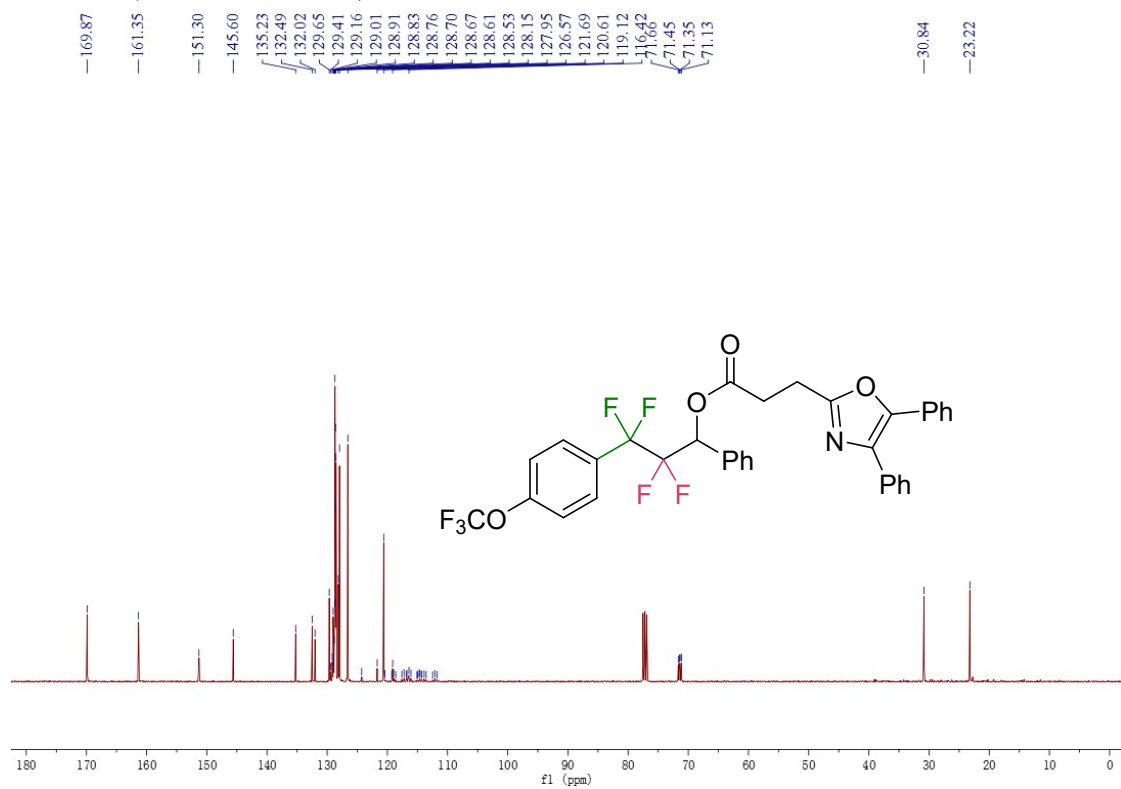



$^1\text{H}$  NMR (400 MHz,  $\text{CDCl}_3$ )

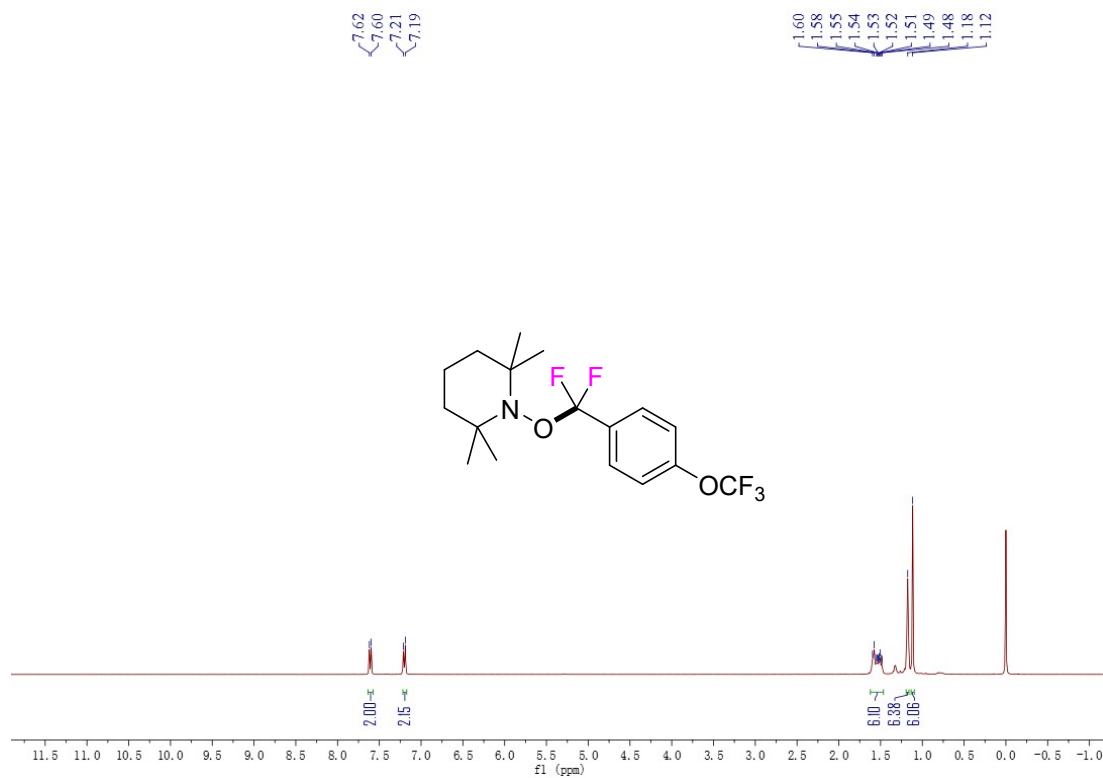

$^{19}\text{F}$  NMR (377 MHz,  $\text{CDCl}_3$ )

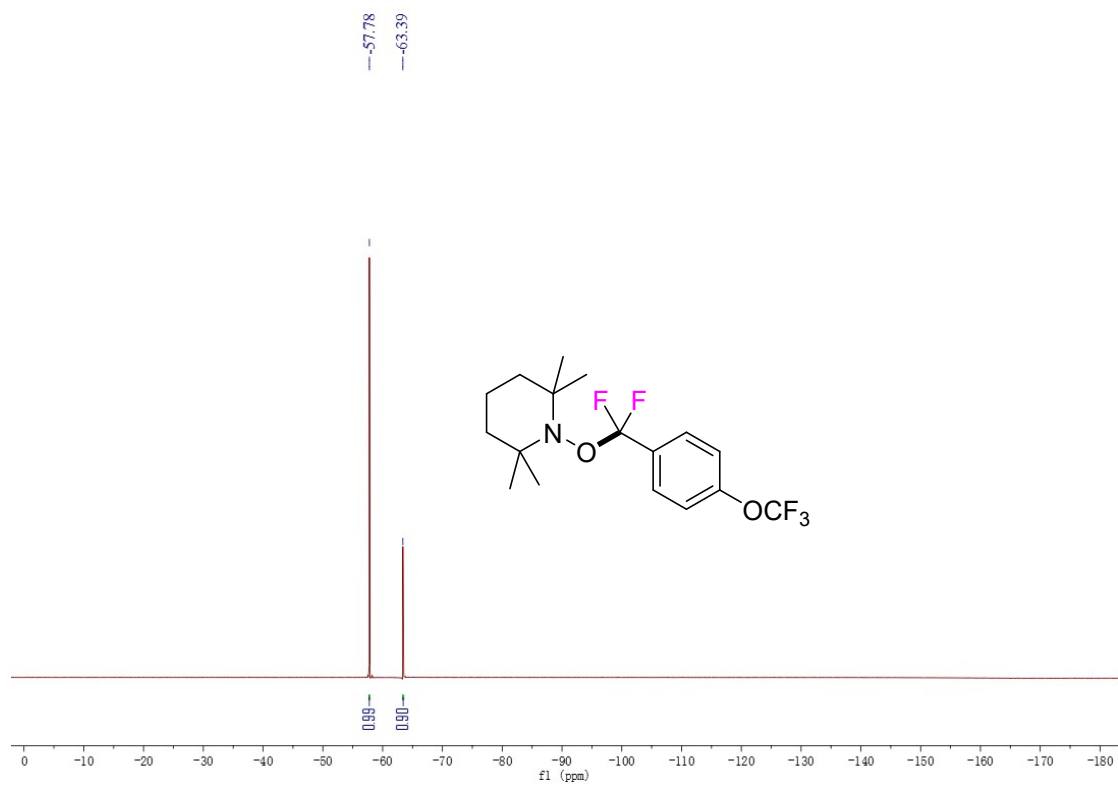

Supplement: d3qo01606d1.pdf [file d3qo01606d1.pdf]
